# Supplementary material for: Transcriptome Analysis of Key Genes Involved in Color Variation between Blue and White Flowers of Iris bulleyana
Source: Hindawi journal article supplement (doi:10.1155/2023/7407772), 2023-01-01
Supplement: f1 [file 7407772.f1.zip]

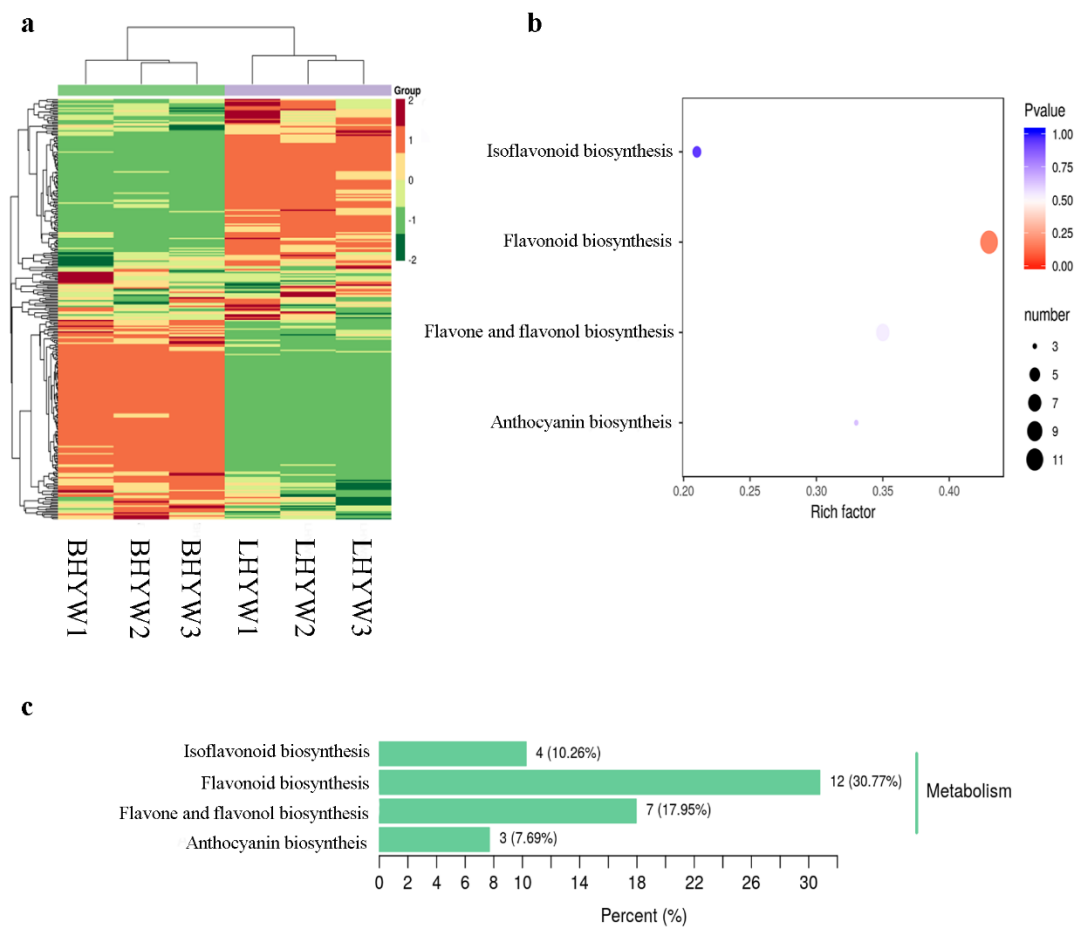

Additional file 1. Flavonoid targeted metabolomics a) clustering of identified metabolites in Southwest iris (LHYW) and its white variant (BHYW) b) KEGG enrichment map of different metabolites c) KEGG enrichment for flavonoid metabolic pathways

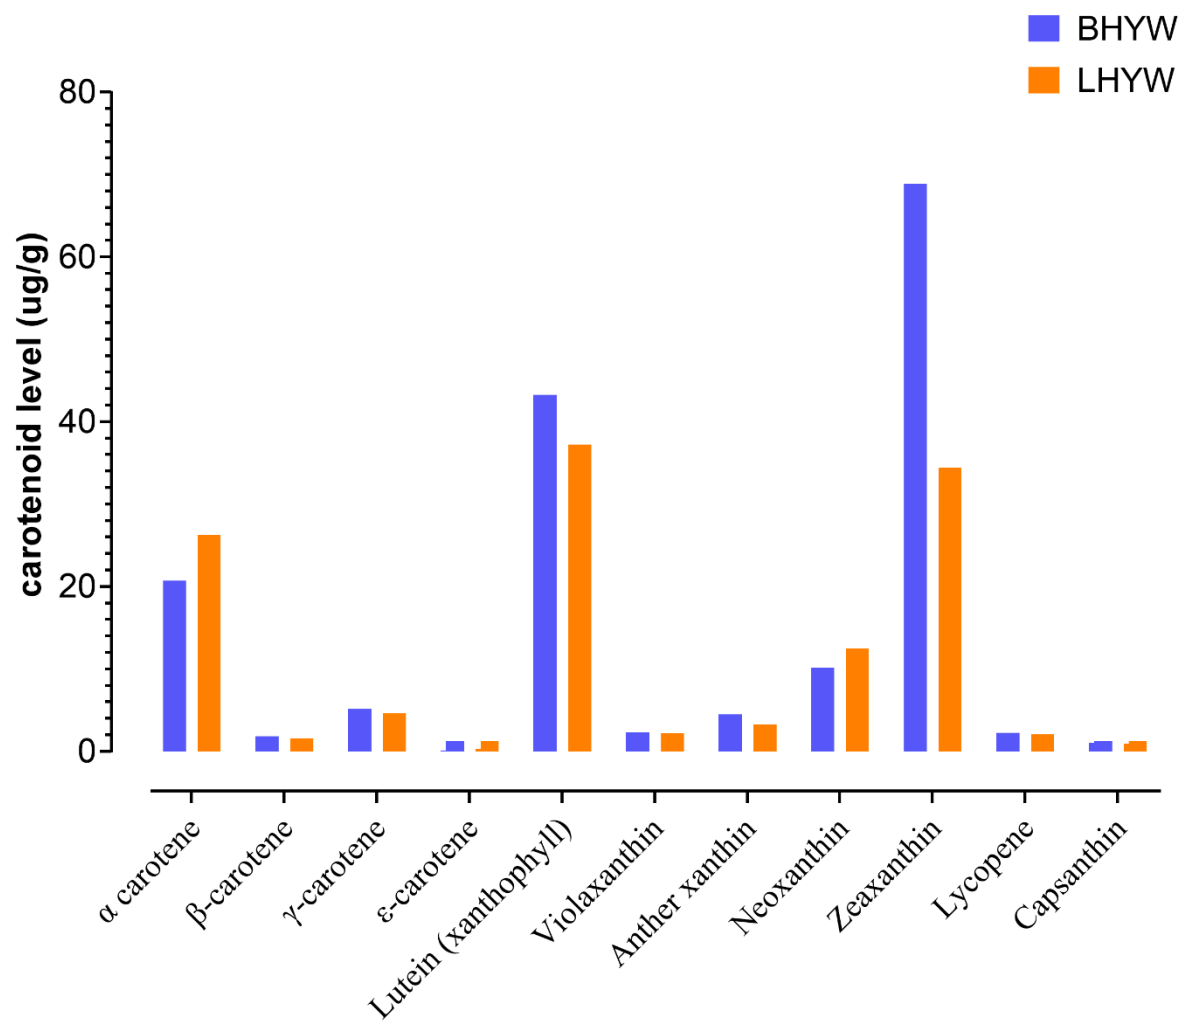

Additional file 3. Histogram of identified carotenoids and their corresponding levels in Southwest iris (LHYW) and its white variant (BHYW);
