# Supplementary material for: Transcriptome Analysis of Key Genes Involved in Color Variation between Blue and White Flowers of Iris bulleyana
Source: Biomed Res Int. 2023 Jan 18;2023:7407772. doi: 10.1155/2023/7407772 (PMC9876678; doi:10.1155/2023/7407772)
Supplement: Supplementary Materials — Additional File 1: flavonoid targeted metabolomics. (a) Clustering of identified metabolites in Southwest iris (LHYW) and its white variant (BHYW). (b) KEGG enrichment map of different metabolites. (c) KEGG enrichment for flavonoid metabolic pathways. Table S2: top 20 most abundant metabolites in pitaya fruit peel. Table S3: top 20 most abundant metabolites in pitaya fruit pulp. Additional File 2: flavonoid profile of Southwest iris (LHYW) and its white variant (BHYW). Additional File 3: histogram of identified carotenoids and their corresponding levels in Southwest iris (LHYW) and its white variant (BHYW). Additional File 4: targeted metabolomics for carotenoids and identified carotenoids between BHYW (white) and LHYW (Southwest blue iris). Additional File 5: metabolic profile of carotenoids and identified carotenoids between BHYW (white) and LHYW (Southwest blue iris). Additional File 6; summary of sequencing data quality. Additional File 7: list of differentially expressed genes (DEGs) identified as a result of the transcriptomic study of Southwest iris. Additional File 8: list of primers used for qRT-PCR. [file 7407772.f1.zip › Additional File 2.txt]

Additional file 2; Flavonoid targeted metabolomics profile of Southestern Iris (LHYW) and its whit variant (BHYW)
Column1	Index	Compounds	Class	LHYW1	LHYW2	LHYW3	BHYW1	BHYW2	BHYW3	VIP	Fold_Change	LogFC	Regulation
1	MWKH2569	unknown	-	7,91E+06	7,84E+06	7,85E+06	3,99E+07	4,01E+07	3,91E+07	9,65E-01	5,05E+00	2,34E+00	-
2	MWKH2570	unknown	-	9,00E+00	9,00E+00	9,00E+00	2,14E+04	1,87E+04	1,82E+04	2,10E+00	2,16E+03	1,11E+01	-
3	MWKH2571	unknown	-	2,29E+05	1,98E+05	1,99E+05	1,48E+05	1,78E+05	1,54E+05	3,66E-01	7,67E-01	-3,83E-01	-
4	MWKH2575	unknown	-	4,55E+07	5,04E+07	5,19E+07	4,21E+05	2,36E+05	2,24E+05	1,72E+00	5,96E-03	-7,39E+00	-
5	pma0214	methylQuercetin O-hexoside	Flavonol	8,44E+06	8,71E+06	7,96E+06	1,14E+07	1,15E+07	1,23E+07	4,36E-01	1,40E+00	4,87E-01	-
6	pma0249	Selgin 5-O-hexoside	Flavone	1,07E+07	1,12E+07	1,06E+07	2,57E+07	2,69E+07	2,48E+07	7,05E-01	2,38E+00	1,25E+00	-
7	pma0253	O-methylChrysoeriol 5-O-hexoside	Flavone	1,12E+07	1,10E+07	1,06E+07	9,96E+06	9,73E+06	9,94E+06	2,35E-01	9,03E-01	-1,47E-01	-
8	pma0294	Chrysoeriol 5-O-hexoside	Flavone	2,64E+06	2,79E+06	2,59E+06	5,28E+05	5,06E+05	5,15E+05	9,72E-01	1,93E-01	-2,37E+00	-
9	pma0359	Tricin 5-O-acetylglucoside	Flavone	1,62E+04	2,01E+04	1,82E+04	3,66E+04	3,84E+04	3,74E+04	6,42E-01	2,06E+00	1,04E+00	-
10	pma0724	Naringenin C-hexoside	Flavone	4,05E+07	3,86E+07	3,76E+07	5,37E+07	5,61E+07	5,58E+07	4,46E-01	1,42E+00	5,05E-01	-
11	pma0757	Tricin O-oxalylhexoside	Flavone	1,16E+05	1,26E+05	1,18E+05	1,79E+05	1,45E+05	1,24E+05	2,87E-01	1,24E+00	3,16E-01	-
12	pma0760	Selgin O-malonylhexoside	Flavone	2,71E+05	2,94E+05	3,36E+05	3,92E+05	3,66E+05	3,52E+05	3,18E-01	1,23E+00	3,01E-01	-
13	pma0791	Naringenin O-malonylhexoside	Flavanone	6,34E+06	6,25E+06	5,96E+06	4,91E+06	5,20E+06	5,07E+06	3,34E-01	8,18E-01	-2,89E-01	-
14	pma0795	Tricetin O-malonylhexoside	Flavone	2,69E+05	2,47E+05	2,80E+05	2,61E+05	2,66E+05	2,62E+05	2,08E-02	9,91E-01	-1,27E-02	-
15	pma0825	Chrysin O-malonylhexoside	Flavone	1,55E+06	1,53E+06	1,64E+06	1,40E+06	1,31E+06	1,31E+06	2,94E-01	8,52E-01	-2,32E-01	-
16	pma1108	Apigenin C-glucoside	Flavone	9,65E+06	9,75E+06	8,63E+06	1,08E+07	1,25E+07	1,15E+07	3,31E-01	1,24E+00	3,12E-01	-
17	pma1116	Kaempferide	Flavonol	2,35E+05	1,91E+05	1,78E+05	3,70E+04	4,67E+04	4,71E+04	9,32E-01	2,17E-01	-2,21E+00	-
18	pma1590	Peonidin O-hexoside	Anthocyanins	7,55E+05	7,25E+05	5,11E+05	1,66E+05	1,32E+05	1,77E+05	8,95E-01	2,39E-01	-2,07E+00	-
19	pma3443	Tricin 7-O-acetylglucoside	Flavone	5,13E+04	4,89E+04	4,30E+04	3,44E+04	4,25E+04	3,89E+04	3,13E-01	8,09E-01	-3,06E-01	-
20	pma6199	Chrysin O-hexoside	Flavone	5,60E+06	5,71E+06	5,58E+06	3,21E+06	3,15E+06	3,19E+06	5,72E-01	5,65E-01	-8,23E-01	-
21	pma6216	Acacetin C-hexoside	Flavone	3,81E+06	4,24E+06	3,32E+06	7,13E+06	4,94E+06	4,44E+06	3,91E-01	1,45E+00	5,38E-01	-
22	pma6218	O-methylnaringenin C-pentoside	Flavone	4,06E+07	4,00E+07	3,53E+07	5,04E+07	5,01E+07	5,63E+07	4,03E-01	1,35E+00	4,36E-01	-
23	pma6229	Eriodictyol C-hexoside	Flavone	8,07E+06	7,81E+06	7,91E+06	1,26E+07	1,23E+07	1,27E+07	5,13E-01	1,58E+00	6,60E-01	-
24	pma6353	Chrysin C-hexoside	Flavone	1,08E+07	1,15E+07	1,13E+07	1,36E+07	1,33E+07	1,44E+07	3,37E-01	1,23E+00	2,98E-01	-
25	pma6360	O-methylChrysoeriol 8-C-hexoside	Flavone	1,77E+06	1,80E+06	1,62E+06	1,20E+05	1,43E+05	1,39E+05	1,21E+00	7,75E-02	-3,69E+00	Down-regulated
26	pma6371	di-C,C-hexosyl-luteolin	Flavone	1,33E+05	1,95E+05	1,74E+05	1,51E+05	1,89E+05	1,22E+05	1,11E-01	9,20E-01	-1,20E-01	-
27	pma6389	Ayanin	Flavonol	4,32E+04	3,74E+04	4,33E+04	1,03E+05	9,42E+04	1,01E+05	7,08E-01	2,41E+00	1,27E+00	-
28	pma6496	Luteolin 6-C-glucoside	Flavone	2,71E+06	2,68E+06	2,61E+06	3,88E+06	3,69E+06	3,62E+06	4,37E-01	1,40E+00	4,84E-01	-
29	pma6499	Limocitrin O-hexoside	Flavone	1,35E+04	9,00E+00	9,00E+00	1,93E+05	2,17E+05	2,11E+05	1,92E+00	4,59E+01	5,52E+00	Up-regulated
30	pma6515	C-hexosyl-chrysin O-feruloylhexoside	Flavone	8,93E+04	8,07E+04	8,63E+04	6,22E+04	6,56E+04	6,59E+04	3,95E-01	7,56E-01	-4,04E-01	-
31	pma6518	C-pentosyl-chrysoeriol 7-O-feruloylhexoside	Flavone	1,34E+06	1,30E+06	1,28E+06	1,58E+06	1,69E+06	1,64E+06	3,56E-01	1,25E+00	3,25E-01	-
32	pma6558	Velutin	Flavone	7,50E+04	9,26E+04	7,97E+04	1,57E+05	1,58E+05	1,63E+05	6,12E-01	1,93E+00	9,51E-01	-
33	pma6576	Spinacetin	Flavone	9,00E+00	9,00E+00	9,00E+00	3,19E+05	3,23E+05	3,68E+05	2,46E+00	3,74E+04	1,52E+01	Up-regulated
34	pma6586	Tricin O-glycerylhexoside	Flavone	4,63E+06	4,57E+06	4,28E+06	4,44E+06	4,72E+06	4,74E+06	8,74E-02	1,03E+00	4,43E-02	-
35	pma6638	O-methylChrysoeriol 7-O-hexoside	Flavone	1,14E+07	1,11E+07	1,12E+07	1,03E+07	9,78E+06	9,97E+06	2,52E-01	8,92E-01	-1,65E-01	-
36	pma6639	Isorhamnetin O-hexoside	Flavonol	4,87E+06	5,07E+06	4,60E+06	1,75E+07	1,50E+07	1,72E+07	8,38E-01	3,42E+00	1,77E+00	-
37	pma6647	C-hexosyl-chrysoeriol O-hexoside	Flavone	2,33E+05	2,29E+05	2,16E+05	7,41E+05	7,14E+05	8,60E+05	8,37E-01	3,41E+00	1,77E+00	-
38	pmb0277	Tricin	Flavone	1,10E+06	1,12E+06	1,11E+06	4,06E+06	3,90E+06	4,11E+06	8,60E-01	3,62E+00	1,86E+00	-
39	pmb0358	Selgin O-hexosyl-O-hexoside	Flavone	1,68E+05	9,00E+00	1,26E+05	9,00E+00	9,00E+00	9,00E+00	1,62E+00	9,18E-05	-1,34E+01	Down-regulated
40	pmb0378	Luteolin O-feruloylhexoside	Flavone	7,50E+04	6,65E+04	8,58E+04	6,87E+04	4,73E+04	7,46E+04	2,36E-01	8,39E-01	-2,54E-01	-
41	pmb0541	Cyanidin 3-O-glucosyl-malonylglucoside	Anthocyanins	6,50E+03	7,47E+03	5,98E+03	4,21E+03	9,00E+00	9,00E+00	1,39E+00	2,12E-01	-2,24E+00	Down-regulated
42	pmb0547	Delphinidin O-malonylhexoside	Anthocyanins	6,58E+03	7,15E+03	5,72E+03	5,13E+03	5,42E+03	5,26E+03	3,12E-01	8,13E-01	-2,99E-01	-
43	pmb0558	Delphinidin O-malonyl-malonylhexoside	Anthocyanins	3,60E+04	2,72E+04	3,19E+04	9,00E+00	9,00E+00	9,00E+00	2,17E+00	2,84E-04	-1,18E+01	Down-regulated
44	pmb0563	Peonidin	Anthocyanins	1,35E+05	1,17E+05	1,11E+05	3,07E+04	4,43E+04	9,00E+00	1,15E+00	2,07E-01	-2,27E+00	Down-regulated
45	pmb0565	Syringetin 3-O-hexoside	Flavonol	9,00E+00	9,00E+00	9,00E+00	2,09E+05	2,05E+05	1,95E+05	2,40E+00	2,26E+04	1,45E+01	Up-regulated
46	pmb0566	Luteolin O-hexosyl-O-pentoside	Flavone	3,09E+06	3,36E+06	2,95E+06	3,21E+06	3,43E+06	3,33E+06	1,41E-01	1,06E+00	8,49E-02	-
47	pmb0569	Syringetin 5-O-hexoside	Flavone	9,34E+04	9,06E+04	7,66E+04	4,72E+06	5,25E+06	5,75E+06	1,53E+00	6,03E+01	5,91E+00	Up-regulated
48	pmb0576	Apigenin O-malonylhexoside	Flavone	3,86E+06	3,60E+06	3,50E+06	4,98E+06	5,23E+06	5,41E+06	4,46E-01	1,43E+00	5,11E-01	-
49	pmb0578	Luteolin O-sinapoylhexoside	Flavone	1,04E+05	7,65E+04	8,85E+04	8,23E+04	6,40E+04	8,46E+04	2,13E-01	8,58E-01	-2,20E-01	-
50	pmb0580	Chrysin 5-O-glucoside (Toringin)	Flavone	5,54E+06	5,82E+06	5,66E+06	3,35E+06	3,07E+06	3,16E+06	5,74E-01	5,63E-01	-8,29E-01	-
51	pmb0588	Luteolin 3',7-di-O-glucoside	Flavone	4,00E+05	3,88E+05	3,84E+05	7,47E+05	6,22E+05	7,63E+05	5,78E-01	1,82E+00	8,63E-01	-
52	pmb0595	Isorhamnetin 5-O-hexoside	Flavonol	8,76E+06	6,85E+06	7,87E+06	7,78E+06	7,44E+06	8,30E+06	1,09E-02	1,00E+00	2,46E-03	-
53	pmb0602	Syringetin 7-O-hexoside	Flavone	9,00E+00	9,00E+00	9,00E+00	9,46E+06	8,92E+06	9,81E+06	2,82E+00	1,04E+06	2,00E+01	Up-regulated
54	pmb0603	Chrysoeriol O-hexosyl-O-hexoside	Flavone	6,30E+04	6,93E+04	6,67E+04	4,01E+04	6,84E+04	6,79E+04	1,82E-01	8,86E-01	-1,74E-01	-
55	pmb0604	Kaempferol 3-O-glucoside (Astragalin)	Flavonol	7,02E+05	8,05E+05	7,21E+05	5,68E+05	4,75E+05	5,56E+05	4,20E-01	7,18E-01	-4,79E-01	-
56	pmb0605	Apigenin 7-O-glucoside (Cosmosiin)	Flavone	1,57E+06	1,63E+06	1,71E+06	1,48E+06	1,52E+06	1,30E+06	2,45E-01	8,76E-01	-1,91E-01	-
57	pmb0608	Chrysoeriol O-malonylhexoside	Flavone	6,45E+05	6,26E+05	5,81E+05	3,74E+05	3,97E+05	4,03E+05	5,08E-01	6,34E-01	-6,58E-01	-
58	pmb0613	Apigenin 6-C-hexosyl-8-C-hexosyl-O-hexoside	Flavone	1,94E+05	1,91E+05	1,82E+05	5,46E+05	5,68E+05	5,48E+05	7,86E-01	2,93E+00	1,55E+00	-
59	pmb0615	Hesperetin C-hexosyl-O-hexosyl-O-hexoside	Flavone	2,36E+05	2,15E+05	1,80E+05	1,21E+06	1,06E+06	1,19E+06	9,88E-01	5,48E+00	2,46E+00	-
60	pmb0617	C-hexosyl-apigenin O-hexosyl-O-pentoside	Flavone	5,30E+04	5,16E+04	4,51E+04	4,30E+04	4,50E+04	3,70E+04	2,82E-01	8,35E-01	-2,60E-01	-
61	pmb0618	8-C-hexosyl-hesperetin O-hexoside	Flavone	3,67E+05	3,43E+05	3,08E+05	5,79E+05	6,43E+05	5,32E+05	5,49E-01	1,72E+00	7,85E-01	-
62	pmb0619	Eriodictiol 6-C-hexoside 8-C-hexoside-O-hexoside	Flavone	3,93E+04	4,02E+04	4,14E+04	5,04E+04	5,36E+04	5,92E+04	4,03E-01	1,35E+00	4,33E-01	-
63	pmb0620	Chrysoeriol 6-C-hexoside 8-C-hexoside-O-hexoside	Flavone	1,32E+06	1,56E+06	1,17E+06	4,15E+04	3,44E+04	2,89E+04	1,45E+00	2,59E-02	-5,27E+00	Down-regulated
64	pmb0621	C-hexosyl-isorhamnetin O-hexoside	Flavone	1,71E+05	1,56E+05	1,37E+05	1,12E+05	1,16E+05	9,95E+04	4,26E-01	7,06E-01	-5,03E-01	-
65	pmb0622	C-hexosyl-luteolin O-hexoside	Flavone	9,85E+06	9,65E+06	9,26E+06	5,24E+06	5,06E+06	5,63E+06	5,81E-01	5,54E-01	-8,52E-01	-
66	pmb0623	6-C-hexosyl chrysoeriol O-hexoside	Flavone	6,01E+05	7,51E+05	6,67E+05	6,66E+05	4,82E+05	6,31E+05	1,92E-01	8,81E-01	-1,83E-01	-
67	pmb0624	6-C-hexosyl-luteolin O-hexoside	Flavone	7,00E+05	7,39E+05	6,66E+05	5,56E+05	5,55E+05	5,56E+05	3,60E-01	7,92E-01	-3,37E-01	-
68	pmb0626	6-C-hexosyl-apigenin O-hexosyl-O-hexoside	Flavone	3,84E+05	4,28E+05	3,81E+05	2,42E+05	2,38E+05	2,39E+05	5,36E-01	6,03E-01	-7,31E-01	-
69	pmb0628	Eriodictiol C-hexosyl-O-hexoside	Flavone	4,13E+06	4,00E+06	4,01E+06	3,65E+06	3,82E+06	3,89E+06	1,79E-01	9,36E-01	-9,58E-02	-
70	pmb0629	Chrysoeriol 6-C-hexoside	Flavone	9,09E+04	1,43E+05	1,55E+05	4,20E+05	3,20E+05	3,27E+05	7,45E-01	2,74E+00	1,46E+00	-
71	pmb0631	C-hexosyl-luteolin C-pentoside	Flavone	7,68E+05	7,95E+05	8,61E+05	7,48E+05	8,05E+05	8,05E+05	6,92E-02	9,73E-01	-3,98E-02	-
72	pmb0636	6-C-hexosyl luteolin O-pentoside	Flavone	4,14E+05	4,02E+05	4,33E+05	7,20E+05	8,22E+05	8,23E+05	6,02E-01	1,89E+00	9,21E-01	-
73	pmb0639	8-C-hexosyl-apigenin O-hexosyl-O-hexoside	Flavone	2,66E+07	2,58E+07	2,28E+07	1,18E+07	1,19E+07	1,22E+07	6,48E-01	4,77E-01	-1,07E+00	-
74	pmb0644	Luteolin C-hexoside	Flavone	2,57E+06	2,61E+06	2,48E+06	3,83E+06	3,55E+06	3,75E+06	4,61E-01	1,45E+00	5,39E-01	-
75	pmb0645	6-C-hexosyl-hesperetin O-hexoside	Flavone	9,99E+05	9,51E+05	9,16E+05	1,18E+06	1,12E+06	1,07E+06	2,90E-01	1,18E+00	2,34E-01	-
76	pmb0647	8-C-hexosyl-luteolin O-pentoside	Flavone	5,64E+05	5,55E+05	5,03E+05	1,27E+06	1,12E+06	1,22E+06	6,75E-01	2,23E+00	1,15E+00	-
77	pmb0648	Isorhamnetin C-hexoside	Flavone	9,93E+03	1,34E+04	2,39E+04	4,41E+04	4,31E+04	3,62E+04	7,23E-01	2,61E+00	1,39E+00	-
78	pmb0652	C-hexosyl-apigenin O-pentoside	Flavone	1,36E+06	1,38E+06	1,13E+06	2,56E+06	2,73E+06	2,65E+06	6,39E-01	2,05E+00	1,04E+00	-
79	pmb0653	di-C,C-hexosyl-apigenin	Flavone	9,00E+05	8,93E+05	6,89E+05	2,17E+06	2,36E+06	2,12E+06	7,49E-01	2,68E+00	1,42E+00	-
80	pmb0657	C-rhamnosyl-acacetin O-p-coumaroylhexoside	Flavone	3,12E+03	7,45E+03	5,44E+03	2,90E+04	2,87E+04	3,06E+04	9,88E-01	5,52E+00	2,46E+00	-
81	pmb0660	C-hexosyl-luteolin O-p-coumaroylhexoside	Flavone	2,42E+04	2,48E+04	2,77E+04	1,82E+04	1,82E+04	1,10E+04	4,90E-01	6,18E-01	-6,94E-01	-
82	pmb0661	Chrysoeriol C-hexosyl-O-rhamnoside	Flavone	2,78E+06	2,79E+06	2,39E+06	2,67E+06	3,27E+06	2,96E+06	1,92E-01	1,12E+00	1,61E-01	-
83	pmb0663	8-C-hexosyl-luteolin O-hexoside	Flavone	1,26E+06	1,13E+06	1,01E+06	4,04E+06	4,15E+06	4,29E+06	8,64E-01	3,67E+00	1,88E+00	-
84	pmb0665	Luteolin 8-C-hexosyl-O-hexoside	Flavone	5,25E+05	5,45E+05	5,53E+05	1,38E+06	1,50E+06	1,49E+06	7,54E-01	2,69E+00	1,43E+00	-
85	pmb0666	6-C-hexosyl-apigenin O-sinapoylhexoside	Flavone	1,50E+05	1,60E+05	1,18E+05	9,00E+00	9,00E+00	9,00E+00	2,36E+00	6,31E-05	-1,40E+01	Down-regulated
86	pmb0668	Apigenin C-hexosyl-O-hexosyl-O-Salicylic acid	Flavone	9,00E+00	5,26E+03	9,88E+03	1,21E+04	1,31E+04	2,27E+04	9,75E-01	3,16E+00	1,66E+00	-
87	pmb0673	Apigenin 6-C-pentoside	Flavone	2,23E+06	2,07E+06	2,03E+06	3,91E+06	3,98E+06	3,83E+06	5,94E-01	1,85E+00	8,89E-01	-
88	pmb0674	C-pentosyl apigenin O-salicyloyl hexoside	Flavone	7,58E+04	8,58E+04	7,92E+04	6,07E+04	7,38E+04	7,24E+04	2,55E-01	8,59E-01	-2,19E-01	-
89	pmb0675	C-pentosyl-apigenin O-p-coumaroylhexoside	Flavone	1,26E+05	1,21E+05	9,64E+04	1,27E+05	9,11E+04	1,48E+05	6,67E-02	1,07E+00	9,23E-02	-
90	pmb0676	8-C-hexosyl-chrysoeriol O-feruloylhexoside	Flavone	3,78E+04	4,52E+04	3,86E+04	3,45E+04	3,78E+04	3,38E+04	2,35E-01	8,73E-01	-1,97E-01	-
91	pmb0678	8-C-hexosyl-apigenin O-feruloylhexoside	Flavone	1,16E+06	1,16E+06	1,11E+06	1,35E+06	1,22E+06	1,30E+06	2,46E-01	1,13E+00	1,74E-01	-
92	pmb0681	Apigenin 8-C-pentoside	Flavone	1,25E+07	1,33E+07	1,19E+07	1,79E+07	1,71E+07	1,74E+07	4,31E-01	1,39E+00	4,75E-01	-
93	pmb0684	C-hexosyl-luteolin O-sinapic acid	Flavone	5,05E+04	5,97E+04	4,39E+04	5,51E+04	5,09E+04	4,52E+04	2,36E-02	9,81E-01	-2,74E-02	-
94	pmb0686	Eriodictyol O-malonylhexoside	Flavanone	7,38E+04	8,06E+04	8,63E+04	7,64E+04	9,34E+04	5,71E+04	1,05E-01	9,43E-01	-8,52E-02	-
95	pmb0687	C-hexosyl-apigenin O-cinnamoylhexoside	Flavone	7,94E+04	7,85E+04	5,37E+04	6,29E+04	8,25E+04	8,08E+04	1,01E-01	1,07E+00	9,63E-02	-
96	pmb0689	Chrysoeriol C-hexoside	Flavone	6,56E+05	6,92E+05	6,16E+05	1,84E+05	1,98E+05	1,81E+05	8,46E-01	2,87E-01	-1,80E+00	-
97	pmb0693	C-hexosyl-apigenin C-pentoside	Flavone	1,52E+07	1,39E+07	1,32E+07	2,06E+07	2,14E+07	1,90E+07	4,50E-01	1,44E+00	5,28E-01	-
98	pmb0695	C-hexosyl-chrysoeriol O-rutinoside	Flavone	1,53E+05	1,58E+05	1,66E+05	1,63E+05	1,76E+05	1,84E+05	1,96E-01	1,10E+00	1,33E-01	-
99	pmb0696	8-C-hexosyl chrysoeriol O-hexoside	Flavone	6,12E+04	6,28E+04	5,63E+04	1,49E+05	1,00E+05	1,39E+05	6,40E-01	2,15E+00	1,11E+00	-
100	pmb0711	Quercetin 7-O-rutinoside	Flavonol	9,00E+00	9,00E+00	9,00E+00	4,72E+06	4,57E+06	4,02E+06	2,74E+00	4,93E+05	1,89E+01	Up-regulated
101	pmb0712	Tricin 5-O-hexosyl-O-hexoside	Flavone	1,32E+05	1,05E+05	1,18E+05	1,03E+05	9,62E+04	1,08E+05	2,37E-01	8,65E-01	-2,09E-01	-
102	pmb0713	Tricin 7-O-hexosyl-O-hexoside	Flavone	1,86E+05	1,73E+05	1,61E+05	1,32E+05	1,18E+05	1,35E+05	4,01E-01	7,40E-01	-4,34E-01	-
103	pmb0714	Tricin 4'-O-(?-guaiacylglyceryl) ether 5-O-hexoside	Flavone	9,00E+00	9,00E+00	9,00E+00	3,44E+04	4,29E+04	3,85E+04	2,19E+00	4,29E+03	1,21E+01	Up-regulated
104	pmb0720	Tricin O-malonylhexoside	Flavone	5,37E+05	5,07E+05	5,01E+05	5,44E+05	5,52E+05	5,34E+05	1,53E-01	1,06E+00	7,73E-02	-
105	pmb0721	Tricin O-feruloylhexoside O-hexoside	Flavone	3,77E+04	3,13E+04	3,98E+04	9,00E+00	9,00E+00	9,00E+00	2,18E+00	2,48E-04	-1,20E+01	Down-regulated
106	pmb0723	Tricin 4'-O-(?-guaiacylglyceryl) ether O-hexoside	Flavone	7,57E+04	7,51E+04	1,01E+05	9,00E+00	9,00E+00	9,00E+00	2,29E+00	1,07E-04	-1,32E+01	Down-regulated
107	pmb0724	Tricin O-rhamnoside	Flavone	1,35E+06	1,58E+06	1,38E+06	8,32E+05	7,74E+05	8,03E+05	5,72E-01	5,59E-01	-8,39E-01	-
108	pmb0733	Tricin 5-O-rutinoside	Flavone	6,02E+04	6,38E+04	4,51E+04	5,59E+04	4,44E+04	6,16E+04	5,84E-02	9,57E-01	-6,28E-02	-
109	pmb0736	Tricin 7-O-hexoside	Flavone	2,07E+07	1,88E+07	1,98E+07	1,47E+07	1,47E+07	1,47E+07	4,09E-01	7,44E-01	-4,27E-01	-
110	pmb0835	Gallocatechin-gallocatechin	Polyphenol	3,17E+06	3,21E+06	3,35E+06	1,48E+06	1,36E+06	1,41E+06	6,89E-01	4,37E-01	-1,19E+00	-
111	pmb1108	Luteolin 6-C-hexoside 8-C-hexosyl-O-hexoside	Flavone	4,03E+04	5,31E+04	4,42E+04	4,59E+04	4,56E+04	4,92E+04	5,20E-02	1,02E+00	3,21E-02	-
112	pmb1466	Tricin 4'-O-syringic acid	Flavone	2,76E+04	3,03E+04	2,75E+04	9,00E+00	9,00E+00	9,00E+00	2,15E+00	3,16E-04	-1,16E+01	Down-regulated
113	pmb2586	Gallocatechin-catechin	Polyphenol	3,37E+05	3,79E+05	3,10E+05	3,05E+05	2,69E+05	2,98E+05	2,64E-01	8,50E-01	-2,35E-01	-
114	pmb2831	Protocatechuic acid O-glucoside	Polyphenol	6,22E+05	6,93E+05	5,57E+05	7,64E+05	8,25E+05	8,19E+05	3,60E-01	1,29E+00	3,63E-01	-
115	pmb2954	Luteolin O-hexosyl-O-hexosyl-O-hexoside	Flavone	1,38E+05	1,62E+05	1,37E+05	3,89E+05	4,30E+05	4,80E+05	7,87E-01	2,97E+00	1,57E+00	-
116	pmb2957	Cyanidin O-syringic acid	Anthocyanins	1,93E+06	2,26E+06	1,77E+06	9,00E+00	9,00E+00	9,00E+00	2,66E+00	4,53E-06	-1,78E+01	Down-regulated
117	pmb2962	Pelargonidin O-acetylhexoside	Anthocyanins	2,44E+03	3,39E+03	2,97E+03	6,54E+03	7,01E+03	4,61E+03	6,13E-01	2,06E+00	1,05E+00	-
118	pmb2975	Hesperetin O-Glucuronic acid	Flavanone	2,13E+04	2,11E+04	1,72E+04	1,03E+04	1,09E+04	9,05E+03	6,13E-01	5,08E-01	-9,78E-01	-
119	pmb2977	Chrysoeriol 8-C-pentosyl-O-rutinoside	Flavone	9,00E+00	6,64E+03	3,42E+04	5,74E+03	9,15E+03	6,83E+03	5,66E-01	5,32E-01	-9,11E-01	-
120	pmb2978	Apigenin O-hexosyl-O-pentoside	Flavone	9,69E+05	9,27E+05	9,42E+05	6,42E+05	6,17E+05	5,21E+05	5,10E-01	6,27E-01	-6,73E-01	-
121	pmb2979	Hesperetin O-malonylhexoside	Flavanone	2,59E+04	2,10E+04	3,11E+04	3,38E+04	2,79E+04	2,18E+04	8,38E-02	1,07E+00	9,83E-02	-
122	pmb2984	Acetyl-eriodictyol O-hexoside	Flavone	2,55E+04	3,50E+04	3,07E+04	2,29E+04	1,95E+04	2,09E+04	4,23E-01	6,94E-01	-5,27E-01	-
123	pmb2986	Chrysoeriol O-hexosyl-O-malonylhexoside	Flavone	7,57E+03	9,08E+03	8,71E+03	8,17E+03	9,90E+03	9,42E+03	1,44E-01	1,08E+00	1,16E-01	-
124	pmb2987	Acacetin O-acetyl hexoside	Flavone	9,50E+04	9,73E+04	9,06E+04	1,45E+05	1,58E+05	1,50E+05	5,18E-01	1,60E+00	6,79E-01	-
125	pmb2988	Luteolin O-hexosyl-O-gluconic acid	Flavone	9,00E+00	9,00E+00	9,00E+00	2,74E+04	2,86E+04	3,04E+04	2,15E+00	3,20E+03	1,16E+01	Up-regulated
126	pmb2991	Apigenin O-hexosyl-O-rutinoside	Flavone	2,92E+04	3,75E+04	1,86E+04	2,14E+04	2,56E+04	2,50E+04	1,50E-01	8,44E-01	-2,45E-01	-
127	pmb3000	Chrysoeriol O-acetylhexoside	Flavone	2,85E+05	2,96E+05	2,71E+05	1,33E+05	1,28E+05	1,42E+05	6,54E-01	4,73E-01	-1,08E+00	-
128	pmb3007	Chrysoeriol O-glucuronic acid	Flavone	1,11E+04	2,10E+04	1,51E+04	1,15E+04	1,22E+04	1,78E+04	1,26E-01	8,79E-01	-1,86E-01	-
129	pmb3012	Chrysoeriol 7-O-hexoside	Flavone	1,13E+06	1,23E+06	1,16E+06	4,20E+05	3,87E+05	4,19E+05	7,78E-01	3,48E-01	-1,52E+00	-
130	pmb3013	Isorhamnetin O-acetyl-hexoside	Flavonol	8,84E+04	8,33E+04	9,07E+04	8,36E+04	7,59E+04	6,84E+04	2,49E-01	8,69E-01	-2,03E-01	-
131	pmb3014	Luteolin O-eudesmic acid-O-hexoside	Flavone	8,28E+03	9,37E+03	9,27E+03	5,58E+03	7,86E+03	7,33E+03	3,44E-01	7,72E-01	-3,74E-01	-
132	pmb3028	Tricin O-sinapic acid	Flavone	4,85E+05	5,16E+05	4,32E+05	3,48E+05	4,35E+05	3,96E+05	2,94E-01	8,23E-01	-2,81E-01	-
133	pmb3031	Tricin O-glycerol	Flavone	1,33E+04	1,84E+04	1,53E+04	5,68E+03	5,33E+03	5,56E+03	7,64E-01	3,53E-01	-1,50E+00	-
134	pmb3032	Tricin O-malonyl rhamnoside	Flavone	1,34E+04	1,71E+04	1,56E+04	1,00E+04	1,04E+04	1,22E+04	4,18E-01	7,07E-01	-5,00E-01	-
135	pmb3041	Tricin O-saccharic acid	Flavone	2,04E+06	2,32E+06	2,02E+06	2,28E+06	2,14E+06	2,13E+06	6,57E-02	1,03E+00	3,79E-02	-
136	pmb3042	Tricin 5-O-hexoside	Flavone	1,84E+05	2,01E+05	1,81E+05	8,88E+04	7,79E+04	5,76E+04	7,21E-01	3,96E-01	-1,34E+00	-
137	pmb3044	Tricin di-O-hexoside	Flavone	9,00E+00	9,00E+00	9,00E+00	4,47E+05	4,20E+05	4,51E+05	2,49E+00	4,88E+04	1,56E+01	Up-regulated
138	pmb3045	Tricin O-glucuronic acid	Flavone	1,59E+04	1,92E+04	1,52E+04	1,91E+04	1,62E+04	1,47E+04	1,10E-02	9,94E-01	-8,63E-03	-
139	pmb3047	Tricin 4'-O-(syringyl alcohol) ether 5-O-hexoside	Flavone	2,41E+04	2,02E+04	2,20E+04	2,19E+04	2,26E+04	2,04E+04	4,31E-02	9,79E-01	-3,08E-02	-
140	pmb3051	Tricin 4'-O-syringyl alcohol	Flavone	9,00E+00	9,00E+00	9,00E+00	1,97E+04	1,94E+04	1,76E+04	2,10E+00	2,10E+03	1,10E+01	Up-regulated
141	pmb3053	Tricin O-eudesmic acid	Flavone	3,39E+03	2,18E+03	2,94E+03	2,28E+04	2,65E+04	2,32E+04	1,11E+00	8,52E+00	3,09E+00	Up-regulated
142	pmb3114	Epicatechin-epiafzelechin	Polyphenol	2,57E+03	3,04E+03	2,79E+03	7,68E+03	6,98E+03	7,18E+03	7,39E-01	2,60E+00	1,38E+00	-
143	pmb3894	Di-O-methylquercetin	Flavonol	3,90E+05	5,05E+05	4,18E+05	1,94E+07	1,93E+07	1,87E+07	1,47E+00	4,37E+01	5,45E+00	Up-regulated
144	pmc1990	4'-Hydroxy-5,7-dimethoxyflavanone	Flavanone	4,35E+04	9,61E+04	5,53E+04	3,75E+04	4,16E+04	3,74E+04	4,28E-01	5,98E-01	-7,42E-01	-
145	pme0002	Hesperetin 7-O-neohesperidoside (Neohesperidin)	Flavanone	9,17E+05	7,88E+05	8,21E+05	9,00E+00	9,00E+00	9,00E+00	2,56E+00	1,07E-05	-1,65E+01	Down-regulated
146	pme0089	Luteolin	Flavone	3,31E+05	2,94E+05	3,19E+05	2,22E+06	2,01E+06	2,30E+06	1,05E+00	6,92E+00	2,79E+00	Up-regulated
147	pme0094	Cyanidin 3-O-glucoside (Kuromanin)	Anthocyanins	4,80E+05	5,09E+05	4,80E+05	9,00E+00	9,00E+00	9,00E+00	2,50E+00	1,84E-05	-1,57E+01	Down-regulated
148	pme0197	Quercetin 3-O-rutinoside (Rutin)	Flavonol	7,70E+05	8,24E+05	6,50E+05	1,03E+07	8,89E+06	9,12E+06	1,21E+00	1,26E+01	3,66E+00	Up-regulated
149	pme0200	Kaempferol	Flavonol	1,92E+05	1,53E+05	1,72E+05	3,16E+06	2,92E+06	3,50E+06	1,29E+00	1,85E+01	4,21E+00	Up-regulated
150	pme0204	Amentoflavone	Flavone	2,58E+04	2,36E+04	3,02E+04	3,07E+04	2,97E+04	2,81E+04	1,93E-01	1,11E+00	1,53E-01	-
151	pme0205	Catechin	Polyphenol	8,74E+06	9,40E+06	7,02E+06	9,90E+06	1,01E+07	1,05E+07	2,92E-01	1,21E+00	2,78E-01	-
152	pme0331	Naringenin 7-O-neohesperidoside (Naringin)	Flavanone	1,86E+05	1,45E+05	9,95E+04	2,91E+05	3,70E+05	2,87E+05	6,48E-01	2,20E+00	1,14E+00	-
153	pme0333	Apigenin 7-O-neohesperidoside (Rhoifolin)	Flavone	5,23E+05	5,23E+05	4,64E+05	7,13E+05	7,25E+05	8,18E+05	4,70E-01	1,49E+00	5,79E-01	-
154	pme0355	Daidzein	Isoflavone	4,73E+04	4,35E+04	4,75E+04	1,75E+04	2,15E+04	1,60E+04	7,24E-01	3,98E-01	-1,33E+00	-
155	pme0359	Apigenin 5-O-glucoside	Flavone	6,80E+05	7,54E+05	5,81E+05	7,69E+05	7,56E+05	8,06E+05	2,46E-01	1,16E+00	2,10E-01	-
156	pme0361	Quercetin 3-alpha-L-arabinofuranoside (Avicularin)	Flavonol	9,00E+00	9,00E+00	9,00E+00	1,66E+05	1,82E+05	1,76E+05	2,38E+00	1,94E+04	1,42E+01	Up-regulated
157	pme0364	Chrysoeriol	Flavone	1,84E+06	1,96E+06	1,60E+06	4,29E+06	4,17E+06	4,51E+06	7,07E-01	2,40E+00	1,26E+00	-
158	pme0367	Apigenin 7-rutinoside (Isorhoifolin)	Flavone	1,16E+07	1,29E+07	1,15E+07	9,59E+06	9,81E+06	1,04E+07	3,13E-01	8,28E-01	-2,73E-01	-
159	pme0369	Kaempferol 3-O-rutinoside (Nicotiflorin)	Flavonol	2,32E+07	2,32E+07	2,34E+07	1,59E+07	1,40E+07	1,51E+07	5,00E-01	6,45E-01	-6,33E-01	-
160	pme0372	Naringenin 7-O-glucoside (Prunin)	Flavanone	3,13E+07	3,08E+07	2,91E+07	1,78E+07	1,67E+07	1,80E+07	5,62E-01	5,76E-01	-7,97E-01	-
161	pme0374	Isovitexin	Flavone	6,61E+06	6,53E+06	7,61E+06	5,81E+06	5,36E+06	5,67E+06	3,24E-01	8,12E-01	-3,01E-01	-
162	pme0376	Naringenin	Flavanone	1,38E+06	1,51E+06	1,39E+06	1,02E+07	9,87E+06	1,02E+07	1,06E+00	7,07E+00	2,82E+00	Up-regulated
163	pme0379	Apigenin	Flavone	3,45E+06	3,43E+06	3,35E+06	2,09E+07	1,90E+07	2,26E+07	1,02E+00	6,11E+00	2,61E+00	Up-regulated
164	pme0421	Phloretin	Flavanone	5,05E+04	7,73E+04	8,00E+04	7,28E+05	7,21E+05	6,84E+05	1,16E+00	1,03E+01	3,36E+00	Up-regulated
165	pme0433	Procyanidin A2	Proanthocyanidins	2,89E+05	2,23E+05	2,43E+05	2,55E+05	3,03E+05	2,92E+05	1,96E-01	1,13E+00	1,71E-01	-
166	pme0435	Procyanidin B2	Proanthocyanidins	2,40E+06	2,56E+06	2,45E+06	2,71E+06	2,56E+06	2,62E+06	1,68E-01	1,06E+00	9,06E-02	-
167	pme0436	Procyanidin B3	Proanthocyanidins	1,17E+05	1,27E+05	1,18E+05	2,55E+05	2,85E+05	2,63E+05	6,75E-01	2,22E+00	1,15E+00	-
168	pme0443	Malvidin 3-O-galactoside	Anthocyanins	2,12E+05	2,19E+05	1,74E+05	5,07E+05	5,84E+05	5,09E+05	7,43E-01	2,64E+00	1,40E+00	-
169	pme0444	Malvidin 3-O-glucoside (Oenin)	Anthocyanins	3,40E+05	2,91E+05	1,75E+05	4,53E+05	4,27E+05	5,10E+05	5,21E-01	1,72E+00	7,86E-01	-
170	pme0460	L-Epicatechin	Polyphenol	2,34E+05	2,42E+05	2,69E+05	1,35E+06	1,31E+06	1,30E+06	9,80E-01	5,32E+00	2,41E+00	-
171	pme1398	Delphinidin 3-O-glucoside (Mirtillin)	Anthocyanins	4,48E+06	4,77E+06	4,07E+06	2,26E+04	2,32E+04	1,47E+04	1,76E+00	4,54E-03	-7,78E+00	Down-regulated
172	pme1399	Xanthohumol	Flavanone	2,09E+05	2,19E+05	2,16E+05	9,89E+04	1,05E+05	9,40E+04	6,65E-01	4,63E-01	-1,11E+00	-
173	pme1480	Myricetin	Flavonol	4,51E+05	4,58E+05	4,13E+05	4,10E+05	4,13E+05	4,62E+05	6,77E-02	9,72E-01	-4,10E-02	-
174	pme1496	Formononetin (4'-O-methyldaidzein)	Isoflavone	1,16E+04	1,31E+04	1,36E+04	4,22E+03	4,59E+03	5,31E+03	7,53E-01	3,69E-01	-1,44E+00	-
175	pme1502	Kumatakenin	Flavonol	2,99E+05	3,35E+05	3,29E+05	6,01E+05	5,92E+05	6,41E+05	6,06E-01	1,90E+00	9,29E-01	-
176	pme1506	Kaempferol 7-O-rhamnoside	Flavonol	7,86E+04	7,22E+04	6,03E+04	7,05E+04	6,20E+04	6,92E+04	7,35E-02	9,55E-01	-6,57E-02	-
177	pme1507	Chrysin	Flavone	6,37E+03	7,70E+03	9,26E+03	1,67E+04	1,56E+04	1,72E+04	6,49E-01	2,12E+00	1,09E+00	-
178	pme1510	Baicalein (5,6,7-Trihydroxyflavone)	Flavone	9,00E+00	9,00E+00	9,00E+00	2,63E+04	2,36E+04	2,59E+04	2,14E+00	2,81E+03	1,15E+01	Up-regulated
179	pme1514	Epigallocatechin (EGC)	Polyphenol	1,39E+07	1,56E+07	1,23E+07	1,48E+07	1,57E+07	1,61E+07	1,99E-01	1,11E+00	1,57E-01	-
180	pme1518	Nobiletin	Flavone	1,62E+05	1,58E+05	1,63E+05	3,54E+05	1,75E+05	1,53E+05	2,71E-01	1,41E+00	4,98E-01	-
181	pme1521	Dihydroquercetin (Taxifolin)	Flavonol	6,10E+05	6,25E+05	5,94E+05	4,01E+06	3,55E+06	3,88E+06	1,03E+00	6,25E+00	2,64E+00	Up-regulated
182	pme1537	(+)-Gallocatechin (GC)	Polyphenol	1,48E+06	1,53E+06	1,59E+06	1,39E+06	1,34E+06	1,36E+06	2,50E-01	8,89E-01	-1,70E-01	-
183	pme1539	Isorhamnetin 3-O-neohesperidoside	Flavonol	3,06E+07	2,82E+07	2,90E+07	3,40E+07	3,04E+07	2,73E+07	8,07E-02	1,04E+00	6,27E-02	-
184	pme1541	Acacetin	Flavone	8,37E+05	1,07E+06	9,25E+05	1,17E+06	1,17E+06	1,22E+06	3,38E-01	1,26E+00	3,30E-01	-
185	pme1550	Tangeretin	Flavone	1,02E+05	9,75E+04	9,67E+04	1,56E+05	1,04E+05	1,01E+05	2,33E-01	1,22E+00	2,85E-01	-
186	pme1552	Myricetin 3-O-rhamnoside (Myricitrin)	Flavonol	1,26E+04	6,17E+03	6,40E+03	2,38E+05	2,26E+05	2,63E+05	1,40E+00	2,89E+01	4,85E+00	Up-regulated
187	pme1564	Epicatechin gallate (ECG)	Polyphenol	7,78E+03	1,12E+04	6,25E+03	1,51E+04	1,65E+04	1,78E+04	5,99E-01	1,96E+00	9,69E-01	-
188	pme1568	Orobol (5,7,3',4'-tetrahydroxyisoflavone)	Isoflavone	1,02E+04	1,08E+04	1,02E+04	7,46E+04	6,59E+04	8,09E+04	1,06E+00	7,10E+00	2,83E+00	Up-regulated
189	pme1578	Genistein (4',5,7-Trihydroxyisoflavone)	Isoflavone	4,07E+04	3,51E+04	3,11E+04	6,40E+04	5,71E+04	6,54E+04	5,54E-01	1,74E+00	8,03E-01	-
190	pme1580	Eriodictyol	Flavanone	2,87E+05	2,98E+05	2,78E+05	2,86E+06	2,83E+06	2,85E+06	1,15E+00	9,90E+00	3,31E+00	Up-regulated
191	pme1590	Isorhamnetin	Flavonol	5,25E+04	4,84E+04	3,55E+04	1,22E+06	1,09E+06	1,33E+06	1,37E+00	2,67E+01	4,74E+00	Up-regulated
192	pme1598	Hesperetin 5-O-glucoside	Flavanone	9,06E+06	1,06E+07	9,61E+06	4,04E+06	3,83E+06	3,52E+06	7,33E-01	3,89E-01	-1,36E+00	-
193	pme1599	7-O-Methyleriodictyol	Flavanone	1,69E+04	2,17E+04	1,69E+04	1,24E+04	1,53E+04	1,14E+04	4,08E-01	7,05E-01	-5,05E-01	-
194	pme1601	Apigenin 4-O-rhamnoside	Flavone	2,06E+06	2,09E+06	1,95E+06	1,71E+06	1,54E+06	1,58E+06	3,58E-01	7,92E-01	-3,37E-01	-
195	pme1605	Kaempferol 3-O-robinobioside (Biorobin)	Flavonol	1,94E+06	2,06E+06	1,65E+06	1,90E+06	1,90E+06	1,78E+06	1,75E-02	9,88E-01	-1,80E-02	-
196	pme1611	Isohemiphloin	Flavone	2,10E+07	2,14E+07	1,67E+07	1,62E+07	1,61E+07	1,73E+07	2,64E-01	8,39E-01	-2,53E-01	-
197	pme1662	sakuranetin	Flavone	1,41E+05	1,50E+05	1,43E+05	8,00E+04	7,97E+04	7,49E+04	5,93E-01	5,41E-01	-8,87E-01	-
198	pme1667	Isovitexin 7-O-glucoside (Saponarin)	Flavonoid	4,31E+06	4,56E+06	4,88E+06	5,74E+06	6,18E+06	5,81E+06	3,73E-01	1,29E+00	3,67E-01	-
199	pme1773	Cyanidin 3-O-rutinoside (Keracyanin)	Anthocyanins	2,95E+06	3,52E+06	3,07E+06	2,67E+06	2,47E+06	2,56E+06	3,27E-01	8,07E-01	-3,09E-01	-
200	pme1777	Cyanidin 3,5-O-diglucoside (Cyanin)	Anthocyanins	3,20E+06	3,35E+06	3,56E+06	1,26E+06	1,23E+06	1,22E+06	7,58E-01	3,67E-01	-1,45E+00	-
201	pme1786	Malvidin 3,5-diglucoside (Malvin)	Anthocyanins	3,84E+05	4,38E+05	4,61E+05	9,00E+00	9,00E+00	9,00E+00	2,49E+00	2,10E-05	-1,55E+01	Down-regulated
202	pme1793	Pelargonin	Anthocyanins	2,98E+05	3,25E+05	2,91E+05	2,03E+05	2,26E+05	2,14E+05	4,42E-01	7,04E-01	-5,07E-01	-
203	pme1824	Protocatechuic acid	Polyphenol	1,97E+05	2,17E+05	2,28E+05	3,65E+05	3,61E+05	3,49E+05	5,41E-01	1,67E+00	7,44E-01	-
204	pme2246	Ellagic acid	Polyphenol	2,58E+04	3,17E+04	2,02E+04	4,56E+04	4,14E+04	4,26E+04	5,20E-01	1,67E+00	7,38E-01	-
205	pme2296	Curcumin	Polyphenol	9,00E+00	9,00E+00	9,00E+00	3,42E+04	3,02E+04	3,06E+04	2,17E+00	3,52E+03	1,18E+01	Up-regulated
206	pme2319	Hesperetin	Flavanone	1,69E+04	1,95E+04	1,62E+04	2,22E+05	2,29E+05	2,31E+05	1,21E+00	1,30E+01	3,70E+00	Up-regulated
207	pme2457	Luteolin 7-O-glucoside (Cynaroside)	Flavone	3,15E+06	3,32E+06	2,31E+06	1,80E+06	2,16E+06	1,76E+06	4,53E-01	6,51E-01	-6,18E-01	-
208	pme2478	Protocatechuic aldehyde	Polyphenol	9,19E+03	9,59E+03	8,93E+03	6,35E+04	6,35E+04	5,85E+04	1,05E+00	6,69E+00	2,74E+00	Up-regulated
209	pme2493	Kaempferol 3,7-dirhamnoside (Kaempferitrin)	Flavonol	2,33E+05	2,47E+05	2,12E+05	3,44E+05	3,20E+05	3,17E+05	4,40E-01	1,42E+00	5,03E-01	-
210	pme2895	Dihydromyricetin	Flavonol	8,65E+05	1,02E+06	7,34E+05	1,38E+06	1,67E+06	1,65E+06	5,63E-01	1,79E+00	8,44E-01	-
211	pme2957	Naringenin chalcone	Flavanone	7,12E+05	7,87E+05	7,09E+05	5,19E+05	4,95E+05	5,16E+05	4,54E-01	6,93E-01	-5,29E-01	-
212	pme2963	Aromadedrin (Dihydrokaempferol)	Flavonol	4,11E+05	4,49E+05	4,07E+05	5,54E+06	5,38E+06	5,62E+06	1,22E+00	1,31E+01	3,71E+00	Up-regulated
213	pme2975	Icariin (kaempferol 3,7-O-diglucoside 8-prenyl derivative)	Flavonol	1,34E+05	1,39E+05	1,39E+05	1,24E+05	1,29E+05	1,33E+05	1,75E-01	9,37E-01	-9,40E-02	-
214	pme2979	Pinocembrin (Dihydrochrysin)	Flavanone	2,58E+05	3,02E+05	2,58E+05	1,51E+05	1,50E+05	1,43E+05	5,87E-01	5,43E-01	-8,82E-01	-
215	pme3129	Quercetin 4'-O-glucoside (Spiraeoside)	Flavonol	8,26E+06	1,02E+07	1,05E+07	3,33E+06	3,29E+06	3,22E+06	7,82E-01	3,40E-01	-1,56E+00	-
216	pme3134	3-Hydroxyflavone	Flavonol	4,09E+03	4,65E+03	4,94E+03	2,77E+04	2,78E+04	2,63E+04	1,01E+00	5,98E+00	2,58E+00	Up-regulated
217	pme3208	Glycitin	Isoflavone	1,88E+05	2,87E+05	2,70E+05	1,01E+05	1,34E+05	1,35E+05	6,00E-01	4,97E-01	-1,01E+00	-
218	pme3209	Genistein 7-O-Glucoside (Genistin)	Isoflavone	2,69E+06	2,82E+06	2,71E+06	2,09E+06	2,23E+06	2,00E+06	3,83E-01	7,69E-01	-3,79E-01	-
219	pme3212	Quercetin 3-O-glucoside (Isotrifoliin)	Flavonol	4,30E+05	4,84E+05	4,33E+05	1,88E+05	1,79E+05	1,61E+05	7,31E-01	3,92E-01	-1,35E+00	-
220	pme3217	Isoliquiritigenin	Flavanone	1,06E+04	1,32E+04	1,32E+04	2,14E+04	1,27E+04	1,13E+04	1,91E-01	1,23E+00	2,95E-01	-
221	pme3224	Vitexin 2''-O-beta-L-rhamnoside	Flavone	7,64E+05	7,22E+05	9,05E+05	5,94E+05	6,54E+05	6,21E+05	3,45E-01	7,82E-01	-3,55E-01	-
222	pme3230	Calycosin	Isoflavone	4,59E+05	4,52E+05	4,60E+05	1,53E+05	1,71E+05	1,61E+05	7,73E-01	3,54E-01	-1,50E+00	-
223	pme3237	Liquiritigenin	Flavanone	3,87E+04	3,92E+04	3,61E+04	3,85E+04	3,57E+04	9,00E+00	8,51E-01	6,51E-01	-6,19E-01	-
224	pme3250	Biochanin A	Isoflavone	1,70E+05	1,67E+05	1,75E+05	2,07E+05	1,97E+05	2,16E+05	3,24E-01	1,21E+00	2,76E-01	-
225	pme3251	Glycitein	Isoflavone	3,54E+05	4,12E+05	3,81E+05	1,60E+05	1,35E+05	1,76E+05	7,10E-01	4,11E-01	-1,28E+00	-
226	pme3256	Delphinidin 3-O-rutinoside (Tulipanin)	Anthocyanins	7,41E+07	8,12E+07	8,54E+07	6,45E+05	4,02E+05	4,33E+05	1,71E+00	6,15E-03	-7,35E+00	Down-regulated
227	pme3261	6-Hydroxydaidzein	Isoflavone	5,43E+04	5,28E+04	5,07E+04	7,76E+05	6,76E+05	6,68E+05	1,22E+00	1,34E+01	3,75E+00	Up-regulated
228	pme3263	2'-Hydroxydaidzein	Isoflavone	1,71E+04	2,30E+04	2,12E+04	1,55E+04	1,68E+04	1,54E+04	3,34E-01	7,78E-01	-3,62E-01	-
229	pme3267	Kaempferol 3-O-galactoside (Trifolin)	Flavonol	5,74E+06	5,27E+06	6,41E+06	3,02E+06	3,21E+06	3,53E+06	5,68E-01	5,60E-01	-8,36E-01	-
230	pme3276	2'-Hydroxygenistein	Isoflavone	4,15E+04	4,42E+04	3,91E+04	2,45E+05	2,34E+05	2,80E+05	1,02E+00	6,08E+00	2,60E+00	Up-regulated
231	pme3285	Afzelechin (3,5,7,4'-Tetrahydroxyflavan)	Flavanone	1,75E+04	1,78E+04	1,74E+04	3,98E+04	3,66E+04	4,94E+04	6,97E-01	2,39E+00	1,26E+00	-
232	pme3290	3,7-Di-O-methylquercetin	Flavonol	9,00E+00	9,00E+00	9,00E+00	1,57E+04	1,56E+04	2,11E+04	2,08E+00	1,94E+03	1,09E+01	Up-regulated
233	pme3292	Prunetin	Isoflavone	9,09E+05	1,12E+06	9,53E+05	1,25E+06	1,20E+06	1,22E+06	3,22E-01	1,23E+00	2,99E-01	-
234	pme3296	Kaempferol 3-O-rhamnoside (Kaempferin)	Flavonol	8,07E+06	8,32E+06	8,25E+06	9,74E+06	9,51E+06	9,61E+06	3,00E-01	1,17E+00	2,28E-01	-
235	pme3300	Tricetin	Flavone	2,09E+06	2,01E+06	1,82E+06	3,51E+06	3,59E+06	3,96E+06	5,95E-01	1,87E+00	9,02E-01	-
236	pme3391	Petunidin 3-O-glucoside	Anthocyanins	9,55E+05	9,99E+05	8,03E+05	7,12E+05	6,95E+05	7,75E+05	3,34E-01	7,91E-01	-3,37E-01	-
237	pme3392	Pelargonidin 3-O-beta-D-glucoside?Callistephin chloride)	Anthocyanins	3,57E+06	3,53E+06	2,79E+06	9,00E+00	9,00E+00	9,00E+00	2,71E+00	2,73E-06	-1,85E+01	Down-regulated
238	pme3396	Fustin	Flavonol	9,65E+04	9,06E+04	9,00E+04	1,04E+05	1,20E+05	9,33E+04	2,21E-01	1,15E+00	1,95E-01	-
239	pme3400	Sissotrin	Isoflavone	3,19E+07	3,28E+07	2,88E+07	1,52E+07	1,47E+07	1,45E+07	6,52E-01	4,75E-01	-1,07E+00	-
240	pme3401	Syringetin	Flavonol	3,07E+03	2,26E+03	1,92E+03	6,77E+05	5,92E+05	6,40E+05	1,79E+00	2,63E+02	8,04E+00	Up-regulated
241	pme3407	Laricitrin	Flavonol	1,59E+04	1,39E+04	1,12E+04	2,07E+05	1,64E+05	1,74E+05	1,22E+00	1,33E+01	3,73E+00	Up-regulated
242	pme3440	Butein	Flavanone	4,69E+04	4,78E+04	4,82E+04	2,51E+04	3,38E+04	2,64E+04	5,33E-01	5,97E-01	-7,44E-01	-
243	pme3442	Quercetin 7-O-?-D-Glucuronide	Flavonol	1,02E+04	1,21E+04	6,92E+03	6,43E+03	6,64E+03	4,57E+03	4,67E-01	6,04E-01	-7,28E-01	-
244	pme3451	Rotenone	Isoflavone	1,94E+04	1,13E+04	1,77E+04	1,73E+04	2,02E+04	1,23E+04	3,87E-02	1,03E+00	4,11E-02	-
245	pme3461	Homoeriodictyol	Flavanone	1,67E+04	1,52E+04	1,62E+04	1,62E+05	1,75E+05	1,79E+05	1,17E+00	1,07E+01	3,42E+00	Up-regulated
246	pme3468	Kaempferol-3-O-robinoside-7-O-rhamnoside (Robinin)	Flavonol	7,03E+04	7,47E+04	7,08E+04	6,69E+04	6,06E+04	7,84E+04	9,80E-02	9,54E-01	-6,78E-02	-
247	pme3473	Butin	Flavone	1,94E+06	2,00E+06	1,91E+06	1,42E+07	1,42E+07	1,39E+07	1,07E+00	7,23E+00	2,85E+00	Up-regulated
248	pme3484	Myricetin 3-O-galactoside	Flavonol	6,58E+04	5,75E+04	5,75E+04	3,94E+05	3,85E+05	2,89E+05	1,00E+00	5,91E+00	2,56E+00	Up-regulated
249	pme3504	Formononetin 7-O-glucoside (Ononin)	Isoflavone	3,72E+05	3,41E+05	3,72E+05	2,89E+05	2,93E+05	2,87E+05	3,50E-01	8,01E-01	-3,20E-01	-
250	pme3514	Morin	Flavonol	4,23E+04	3,45E+04	3,47E+04	9,44E+05	8,79E+05	1,02E+06	1,36E+00	2,55E+01	4,67E+00	Up-regulated
251	pme3609	Cyanidin	Anthocyanins	5,12E+04	7,01E+04	5,41E+04	9,56E+04	1,00E+05	1,02E+05	5,39E-01	1,70E+00	7,63E-01	-
252	pmf0005	Narirutin	Flavone	1,28E+05	1,36E+05	1,26E+05	2,18E+05	2,13E+05	2,57E+05	5,63E-01	1,76E+00	8,19E-01	-
253	pmf0011	Apigenin 6,8-C-diglucoside	Flavone	7,22E+06	6,86E+06	6,70E+06	5,64E+06	6,43E+06	6,62E+06	2,09E-01	8,99E-01	-1,53E-01	-
254	pmf0012	6,8-di-C-glucoside Apigenine	Flavone	6,09E+06	6,02E+06	5,57E+06	6,49E+06	6,88E+06	6,38E+06	2,31E-01	1,12E+00	1,60E-01	-
255	pmf0027	Cyanidin 3-O-galactoside	Anthocyanins	7,73E+07	7,71E+07	7,14E+07	9,00E+00	9,00E+00	9,00E+00	3,03E+00	1,20E-07	-2,30E+01	Down-regulated
256	pmf0057	4,2',4',6'-Tetrahydroxychalcone	Flavone	1,95E+06	2,02E+06	1,91E+06	1,38E+07	1,40E+07	1,38E+07	1,06E+00	7,07E+00	2,82E+00	Up-regulated
257	pmf0058	4',5,7-Trihydroxyflavanone	Flavanone	1,85E+06	1,99E+06	1,90E+06	1,37E+07	1,36E+07	1,37E+07	1,06E+00	7,14E+00	2,84E+00	Up-regulated
258	pmf0127	Deoxyrhapontin	Flavonoid	1,23E+05	1,57E+05	1,49E+05	1,06E+05	9,60E+04	1,00E+05	4,25E-01	7,04E-01	-5,06E-01	-
259	pmf0151	Quercetin	Flavonoid	4,06E+04	4,49E+04	4,11E+04	1,02E+06	9,49E+05	1,07E+06	1,35E+00	2,40E+01	4,59E+00	Up-regulated
260	pmf0179	Narcissoside	Flavonoid	2,99E+07	3,25E+07	3,46E+07	2,00E+07	2,11E+07	2,06E+07	5,04E-01	6,36E-01	-6,53E-01	-
261	pmf0203	Peonidin 3-O-glucoside chloride	Anthocyanins	5,63E+05	4,30E+05	4,23E+05	1,32E+05	1,34E+05	1,53E+05	8,28E-01	2,96E-01	-1,76E+00	-
262	pmf0204	Hyperoside	Flavonoid	9,62E+05	1,15E+06	6,68E+05	1,79E+06	1,73E+06	2,09E+06	6,13E-01	2,02E+00	1,01E+00	-
263	pmf0208	Isoquercitroside	Flavonoid	7,93E+06	7,80E+06	6,90E+06	9,00E+00	9,00E+00	9,00E+00	2,80E+00	1,19E-06	-1,97E+01	Down-regulated
264	pmf0234	Isoschaftoside	Flavonoid	1,03E+06	1,24E+06	8,80E+05	1,02E+06	9,52E+05	9,23E+05	1,22E-01	9,19E-01	-1,22E-01	-
265	pmf0236	Theaflavin	Polyphenol	1,44E+04	1,58E+04	1,08E+04	2,00E+04	1,85E+04	1,89E+04	4,08E-01	1,40E+00	4,85E-01	-
266	pmf0239	Theaflavin-3-gallate	Polyphenol	8,87E+03	1,13E+04	1,36E+04	1,72E+04	1,31E+04	1,21E+04	2,77E-01	1,26E+00	3,28E-01	-
267	pmf0247	Orientin	Flavonoid	2,67E+06	2,77E+06	2,74E+06	3,56E+06	3,70E+06	3,70E+06	4,09E-01	1,34E+00	4,22E-01	-
268	pmf0266	5,7-Dihydroxychromone	Flavonoid	9,00E+00	9,00E+00	9,00E+00	1,70E+05	1,65E+05	1,50E+05	2,37E+00	1,80E+04	1,41E+01	Up-regulated
269	pmf0275	Herbacetin	Flavonoid	1,26E+05	1,47E+05	1,24E+05	1,12E+05	1,22E+05	9,42E+04	2,82E-01	8,27E-01	-2,75E-01	-
270	pmf0277	Gossypol	Polyphenol	1,27E+05	1,54E+05	1,48E+05	2,15E+06	2,15E+06	1,86E+06	1,24E+00	1,44E+01	3,84E+00	Up-regulated
271	pmf0278	Gossypitrin	Flavonoid	1,12E+05	1,53E+05	1,22E+05	3,22E+04	3,37E+04	4,48E+04	8,39E-01	2,86E-01	-1,81E+00	-
272	pmf0302	Engeletin	Flavonoid	3,02E+05	3,53E+05	3,31E+05	4,26E+05	3,61E+05	4,04E+05	2,98E-01	1,21E+00	2,73E-01	-
273	pmf0330	Spinosin	Flavonoid	3,83E+06	3,73E+06	3,33E+06	3,64E+06	3,58E+06	3,69E+06	9,09E-03	1,00E+00	2,65E-03	-
274	pmf0345	(-)-Epiafzelechin	Polyphenol	4,58E+04	5,01E+04	3,61E+04	9,00E+00	1,39E+04	9,00E+00	1,64E+00	1,05E-01	-3,25E+00	Down-regulated
275	pmf0360	Astilbin	Flavonoid	5,43E+05	6,03E+05	5,15E+05	1,95E+05	2,32E+05	2,44E+05	7,17E-01	4,04E-01	-1,31E+00	-
276	pmf0363	Hydroxygenkwanin	Flavonoid	3,95E+04	4,91E+04	4,81E+04	1,64E+05	1,54E+05	1,82E+05	8,61E-01	3,66E+00	1,87E+00	-
277	pmf0370	Persicoside	Flavonoid	7,92E+06	9,03E+06	8,08E+06	9,37E+06	9,73E+06	9,45E+06	2,54E-01	1,14E+00	1,90E-01	-
278	pmf0372	Pedalitin	Flavonoid	1,91E+06	1,63E+06	1,74E+06	2,39E+06	2,12E+06	2,25E+06	3,60E-01	1,28E+00	3,56E-01	-
279	pmf0374	Isorhamnetin 3-O-glucoside	Flavonoid	1,28E+06	1,43E+06	1,41E+06	3,11E+06	3,12E+06	2,90E+06	6,75E-01	2,22E+00	1,15E+00	-
280	pmf0381	Vicenin-3	Flavonoid	2,05E+07	2,28E+07	2,23E+07	1,62E+07	1,43E+07	1,64E+07	4,29E-01	7,15E-01	-4,84E-01	-
281	pmf0393	Persicogenin	Flavonoid	1,53E+05	1,65E+05	1,67E+05	1,38E+05	1,50E+05	1,52E+05	2,07E-01	9,07E-01	-1,40E-01	-
282	pmf0417	Eriocitrin	Flavonoid	1,96E+05	2,44E+05	1,56E+05	1,53E+05	1,61E+05	1,53E+05	2,93E-01	7,84E-01	-3,52E-01	-
283	pmf0454	Silibinin	Flavonoid	1,58E+05	1,53E+05	1,47E+05	1,39E+05	1,26E+05	1,26E+05	2,86E-01	8,54E-01	-2,28E-01	-
284	pmf0458	6-Gingerol	Polyphenol	3,95E+06	4,05E+06	4,09E+06	1,06E+07	1,04E+07	1,04E+07	7,41E-01	2,60E+00	1,38E+00	-
285	pmf0464	Farrerol	Flavonoid	2,05E+04	1,73E+04	2,09E+04	9,00E+00	9,00E+00	9,00E+00	2,10E+00	4,60E-04	-1,11E+01	Down-regulated
286	pmf0472	Apiin	Flavonoid	3,40E+06	3,58E+06	3,06E+06	3,20E+06	3,42E+06	3,61E+06	4,34E-02	1,02E+00	2,70E-02	-
287	pmf0493	Puararin	Flavonoid	3,89E+04	4,94E+04	4,62E+04	5,05E+04	7,16E+04	7,13E+04	4,03E-01	1,44E+00	5,24E-01	-
288	pmf0548	Schaftoside	Flavonoid	2,26E+07	2,49E+07	2,02E+07	1,41E+07	1,44E+07	1,41E+07	5,05E-01	6,29E-01	-6,68E-01	-
289	pmf0549	Diosmin	Flavonoid	8,29E+04	8,25E+04	9,07E+04	5,61E+04	5,41E+04	5,76E+04	4,89E-01	6,55E-01	-6,10E-01	-
290	pmf0551	Tectochrysin	Flavonoid	2,24E+04	2,42E+04	2,33E+04	1,35E+04	1,66E+04	1,12E+04	5,33E-01	5,91E-01	-7,59E-01	-
291	pmf0567	Tectorigenin	Flavonoid	1,26E+04	1,46E+04	1,04E+04	2,31E+04	2,39E+04	3,12E+04	6,28E-01	2,08E+00	1,06E+00	-
292	pmf0569	Liquiritin	Flavonoid	3,86E+04	2,79E+04	4,55E+04	4,16E+04	2,89E+04	4,01E+04	6,72E-03	9,88E-01	-1,81E-02	-
293	pmf0583	Phloridzin	Flavonoid	3,03E+06	3,98E+06	3,98E+06	5,38E+04	5,54E+04	6,14E+04	1,55E+00	1,55E-02	-6,01E+00	Down-regulated
294	pmf0611	Chalcone	Flavonoid	9,49E+03	1,01E+04	1,22E+04	2,53E+04	1,99E+04	2,31E+04	6,52E-01	2,15E+00	1,10E+00	-
295	pmf0614	Peonidin 3, 5-diglucoside chloride	Anthocyanins	1,39E+04	2,19E+04	2,03E+04	9,00E+00	9,00E+00	9,00E+00	2,09E+00	4,81E-04	-1,10E+01	Down-regulated
296	pmf0615	Petunidin 3, 5-diglucoside	Anthocyanins	1,66E+06	1,86E+06	1,62E+06	1,26E+05	1,33E+05	1,04E+05	1,23E+00	7,06E-02	-3,82E+00	Down-regulated
297	pmf0617	Peonidin 3-sophoroside-5-glucoside.	Anthocyanins	1,39E+05	1,31E+05	1,27E+05	9,00E+00	9,00E+00	9,00E+00	2,35E+00	6,80E-05	-1,38E+01	Down-regulated
