# Supplementary material for: Transcriptome Analysis of Key Genes Involved in Color Variation between Blue and White Flowers of Iris bulleyana
Source: Biomed Res Int. 2023 Jan 18;2023:7407772. doi: 10.1155/2023/7407772 (PMC9876678; doi:10.1155/2023/7407772)
Supplement: Supplementary Materials — Additional File 1: flavonoid targeted metabolomics. (a) Clustering of identified metabolites in Southwest iris (LHYW) and its white variant (BHYW). (b) KEGG enrichment map of different metabolites. (c) KEGG enrichment for flavonoid metabolic pathways. Table S2: top 20 most abundant metabolites in pitaya fruit peel. Table S3: top 20 most abundant metabolites in pitaya fruit pulp. Additional File 2: flavonoid profile of Southwest iris (LHYW) and its white variant (BHYW). Additional File 3: histogram of identified carotenoids and their corresponding levels in Southwest iris (LHYW) and its white variant (BHYW). Additional File 4: targeted metabolomics for carotenoids and identified carotenoids between BHYW (white) and LHYW (Southwest blue iris). Additional File 5: metabolic profile of carotenoids and identified carotenoids between BHYW (white) and LHYW (Southwest blue iris). Additional File 6; summary of sequencing data quality. Additional File 7: list of differentially expressed genes (DEGs) identified as a result of the transcriptomic study of Southwest iris. Additional File 8: list of primers used for qRT-PCR. [file 7407772.f1.zip › Additional file 4.txt]

Additional file 4; Targeted metabolomics for carotenoids and identified carotenoids between BHYW (White) and LHYW (Southwestern blue iris)
Sample #	variable	Group	N	value	Sd	SE	ci
1	?-carotene	BHYW	3	20,72893333	0,504300906	0,291158264	1,252752898
2	?-carotene	LHYW	3	26,27916667	0,718289923	0,41470488	1,784331085
3	?-carotene	BHYW	3	1,8142	0,025283394	0,014597374	0,062807432
4	?-carotene	LHYW	3	1,575833333	0,015144086	0,008743442	0,037619995
5	?-carotene	BHYW	3	5,173433333	0,364074667	0,210198607	0,904411611
6	?-carotene	LHYW	3	4,636	0,363208466	0,209698506	0,902259848
7	?-carotene	BHYW	3	0,136466667	0,025946548	0,014980246	0,064454797
8	?-carotene	LHYW	3	0,3251	0,011862125	0,006848601	0,029467151
9	xanthophyll	BHYW	3	43,23486667	4,065830121	2,347408115	10,10008193
10	xanthophyll	LHYW	3	37,19736667	1,747125371	1,008703303	4,340100022
11	Violaxanthin	BHYW	3	2,280666667	0,159655922	0,092177389	0,396607296
12	Violaxanthin	LHYW	3	2,167466667	0,124367895	0,071803838	0,308946978
13	Anther xanthin	BHYW	3	4,480066667	0,151707031	0,087588095	0,376861157
14	Anther xanthin	LHYW	3	3,276833333	0,043236597	0,024962661	0,107405662
15	Neoxanthin	BHYW	3	10,1831	0,822983517	0,475149755	2,044404392
16	Neoxanthin	LHYW	3	12,45856667	1,744786681	1,00735306	4,334290394
17	Zeaxanthin	BHYW	3	68,8937	3,015895938	1,741228332	7,491900835
18	Zeaxanthin	LHYW	3	34,46113333	1,683144311	0,971763821	4,181162259
19	Lycopene	BHYW	3	2,256366667	0,02753985	0,01590014	0,06841278
20	Lycopene	LHYW	3	2,045566667	0,02069839	0,011950221	0,05141765
21	Capsanthin	BHYW	3	1,042	0,001249	0,00072111	0,003102687
22	Capsanthin	LHYW	3	0,9521	0,022656346	0,013080647	0,056281483
