# Supplementary material for: Transcriptome Analysis of Key Genes Involved in Color Variation between Blue and White Flowers of Iris bulleyana
Source: Biomed Res Int. 2023 Jan 18;2023:7407772. doi: 10.1155/2023/7407772 (PMC9876678; doi:10.1155/2023/7407772)
Supplement: Supplementary Materials — Additional File 1: flavonoid targeted metabolomics. (a) Clustering of identified metabolites in Southwest iris (LHYW) and its white variant (BHYW). (b) KEGG enrichment map of different metabolites. (c) KEGG enrichment for flavonoid metabolic pathways. Table S2: top 20 most abundant metabolites in pitaya fruit peel. Table S3: top 20 most abundant metabolites in pitaya fruit pulp. Additional File 2: flavonoid profile of Southwest iris (LHYW) and its white variant (BHYW). Additional File 3: histogram of identified carotenoids and their corresponding levels in Southwest iris (LHYW) and its white variant (BHYW). Additional File 4: targeted metabolomics for carotenoids and identified carotenoids between BHYW (white) and LHYW (Southwest blue iris). Additional File 5: metabolic profile of carotenoids and identified carotenoids between BHYW (white) and LHYW (Southwest blue iris). Additional File 6; summary of sequencing data quality. Additional File 7: list of differentially expressed genes (DEGs) identified as a result of the transcriptomic study of Southwest iris. Additional File 8: list of primers used for qRT-PCR. [file 7407772.f1.zip › Additional file 5.txt]

Additional file 5; Metabolic profile of carotenoids and identified carotenoids between BHYW (White) and LHYW (Southwestern blue iris)
Sample_ID	Group	?-Carotene	?-Carotene	?-Carotene	?-Carotene	Lutein	Violaxanthin	Antheraxanthin	Neoxanthin	Zeaxanthin	?-Cryptoxanthin	ycopene	Phytofluene	(E/Z)-Phytoene	Astaxanthin	Capsanthin	Apocarotenal
BHYW1	BHYW	20,9279	1,8127	5,3475	0,1081	38,5472	2,0994	4,3174	10,5654	66,2572	N/A	2,2302	N/A	N/A	N/A	1,0406	N/A
BHYW2	BHYW	20,1555	1,7897	4,755	0,1423	45,803	2,4004	4,6177	10,7454	68,2416	N/A	2,2851	N/A	N/A	N/A	1,043	N/A
BHYW3	BHYW	21,1034	1,8402	5,4178	0,159	45,3544	2,3422	4,5051	9,2385	72,1823	N/A	2,2538	N/A	N/A	N/A	1,0424	N/A
LHYW1	LHYW	26,5213	1,5706	4,6778	0,3126	37,2774	2,0858	3,3261	11,1686	34,709	N/A	2,0274	N/A	N/A	N/A	0,9636	N/A
LHYW2	LHYW	26,8451	1,5929	4,9765	0,3362	38,9031	2,106	3,2592	11,7633	36,0066	N/A	2,0681	N/A	N/A	N/A	0,9667	N/A
LHYW3	LHYW	25,4711	1,564	4,2537	0,3265	35,4116	2,3106	3,2452	14,4438	32,6678	N/A	2,0412	N/A	N/A	N/A	0,926	N/A
