# Supplementary material for: Transcriptome Analysis of Key Genes Involved in Color Variation between Blue and White Flowers of Iris bulleyana
Source: Biomed Res Int. 2023 Jan 18;2023:7407772. doi: 10.1155/2023/7407772 (PMC9876678; doi:10.1155/2023/7407772)
Supplement: Supplementary Materials — Additional File 1: flavonoid targeted metabolomics. (a) Clustering of identified metabolites in Southwest iris (LHYW) and its white variant (BHYW). (b) KEGG enrichment map of different metabolites. (c) KEGG enrichment for flavonoid metabolic pathways. Table S2: top 20 most abundant metabolites in pitaya fruit peel. Table S3: top 20 most abundant metabolites in pitaya fruit pulp. Additional File 2: flavonoid profile of Southwest iris (LHYW) and its white variant (BHYW). Additional File 3: histogram of identified carotenoids and their corresponding levels in Southwest iris (LHYW) and its white variant (BHYW). Additional File 4: targeted metabolomics for carotenoids and identified carotenoids between BHYW (white) and LHYW (Southwest blue iris). Additional File 5: metabolic profile of carotenoids and identified carotenoids between BHYW (white) and LHYW (Southwest blue iris). Additional File 6; summary of sequencing data quality. Additional File 7: list of differentially expressed genes (DEGs) identified as a result of the transcriptomic study of Southwest iris. Additional File 8: list of primers used for qRT-PCR. [file 7407772.f1.zip › Additional file 7.txt]

Additional file 7; List of differentially expressed genes (DEGs) identified as a result of transcriptomic study of Southwestern Iris (LHYW) and white variant (BHYW) and corresponding annotations
#	gene_id	BHYW_readcount	LHYW_readcount	log2FoldChange	pval	padj	Regulation	Column1	NR ID	NR Description	NT ID	NT Description	KO ID	KO Name	KO Description	Swissprot ID	Swissprot Description	PFAM ID	PFAM description	Gene Ontology Biological Pathway	BP Description	Gene Ontology Molecular Function	MF Description	Gene Ontology Cellular Component	CC Description	KOG ID
1	c174379_g1	36,97020073	38412,75554	-10,021	4,41E-80	1,05E-74	Down-regulated		BAD83701.1	anthocyanidin 3-O-glucosyltransferase [Iris hollandica]	AB161175.1	Iris hollandica Ih3GT mRNA for anthocyanidin 3-O-glucosyltransferase, cpmplete cds	K12930	BZ1	anthocyanidin 3-O-glucosyltransferase	Q40289	Anthocyanidin 3-O-glucosyltransferase 7 (Fragment) OS=Manihot esculenta GN=GT7 PE=2 SV=1	PF04101//PF00201	Glycosyltransferase family 28 C-terminal domain//UDP-glucoronosyl and UDP-glucosyl transferase	GO:0008152	metabolic process	GO:0016758	transferase activity, transferring hexosyl groups	--	--	KOG1192
2	c138508_g1	367,1396936	0	-	2,25E-36	1,81E-31	Up-regulated		--	--	--	--	--	--	--	--	--	PF06703	Microsomal signal peptidase 25 kDa subunit (SPC25)	GO:0006465	signal peptide processing	GO:0008233	peptidase activity	GO:0016021//GO:0005787	integral component of membrane//signal peptidase complex	--
3	c172577_g4	401,0103325	0,481224962	9,7027	2,28E-36	1,81E-31	Up-regulated		XP_010258403.1	PREDICTED: uncharacterized protein LOC104598171 [Nelumbo nucifera]	--	--	--	--	--	--	--	--	--	--	--	--	--	--	--	--
4	c174534_g2	970,3330532	11,96028662	6,3422	4,12E-35	2,46E-30	Up-regulated		XP_010914761.1	PREDICTED: pleiotropic drug resistance protein 3-like [Elaeis guineensis]	XM_010916460.1	PREDICTED: Elaeis guineensis pleiotropic drug resistance protein 3-like (LOC105040086), mRNA	--	--	--	Q8GU83	ABC transporter G family member 41 OS=Oryza sativa subsp. japonica GN=ABCG41 PE=3 SV=1	PF03193//PF01061//PF13304//PF00005	Protein of unknown function, DUF258//ABC-2 type transporter//AAA domain, putative AbiEii toxin, Type IV TA system//ABC transporter	--	--	GO:0016887//GO:0003924//GO:0005524//GO:0005525	ATPase activity//GTPase activity//ATP binding//GTP binding	GO:0016020	membrane	KOG0065
5	c222718_g1	370,4718732	0,768696257	8,9127	4,60E-34	2,19E-29	Up-regulated		--	--	--	--	--	--	--	--	--	--	--	--	--	--	--	--	--	--
6	c113554_g1	322,6490486	0,908430717	8,4724	5,39E-31	2,14E-26	Up-regulated		XP_009783549.1	PREDICTED: uncharacterized protein LOC104232135 [Nicotiana sylvestris]	--	--	--	--	--	--	--	--	--	--	--	--	--	--	--	--
7	c268593_g1	0,319058642	355,4052732	-10,121	1,75E-30	5,97E-26	Down-regulated		XP_009406448.1	PREDICTED: glutathione S-transferase zeta class-like isoform X3 [Musa acuminata subsp. malaccensis]	--	--	K01800	maiA, GSTZ1	maleylacetoacetate isomerase	P57108	Glutathione S-transferase zeta class OS=Euphorbia esula PE=2 SV=1	PF02798//PF13409//PF13417	Glutathione S-transferase, N-terminal domain//Glutathione S-transferase, N-terminal domain//Glutathione S-transferase, N-terminal domain	--	--	GO:0005515	protein binding	--	--	KOG0868
8	c140010_g1	0	225,7312127	-	4,19E-30	1,25E-25	Down-regulated		--	--	--	--	--	--	--	--	--	--	--	--	--	--	--	--	--	--
9	c134319_g1	1034,66028	5133,332091	-2,3107	5,03E-03	3,47E-02	Down-regulated
10	c173208_g1	0	223,7695382	-	6,89E-30	1,82E-25	Down-regulated		XP_006485449.1	PREDICTED: uncharacterized protein LOC102621413 [Citrus sinensis]	--	--	--	--	--	P93295	Uncharacterized mitochondrial protein AtMg00310 OS=Arabidopsis thaliana GN=AtMg00310 PE=4 SV=1	PF01140	Matrix protein (MA), p15	--	--	GO:0005198	structural molecule activity	GO:0019028	viral capsid	--
11	c162693_g1	225,6717727	0	-	1,67E-28	3,97E-24	Up-regulated		XP_010243263.1	PREDICTED: uncharacterized protein LOC104587376 [Nelumbo nucifera]	--	--	--	--	--	--	--	PF16588	C2H2 zinc-finger	--	--	GO:0003676//GO:0008270	nucleic acid binding//zinc ion binding	--	--	--
12	c154476_g2	0,316036187	236,4384969	-9,5472	3,35E-28	7,25E-24	Down-regulated		XP_006858694.1	PREDICTED: guanosine nucleotide diphosphate dissociation inhibitor 2 [Amborella trichopoda]>gi|548862805|gb|ERN20161.1| hypothetical protein AMTR_s00066p00096020 [Amborella trichopoda]	--	--	--	--	--	O24653	Guanosine nucleotide diphosphate dissociation inhibitor 2 OS=Arabidopsis thaliana GN=GDI2 PE=2 SV=1	--	--	--	--	--	--	--	--	--
13	c161235_g1	0,531659165	264,9577872	-8,961	1,55E-27	3,08E-23	Down-regulated		XP_009417884.1	PREDICTED: SUN domain-containing protein 3-like [Musa acuminata subsp. malaccensis]>gi|695059085|ref|XP_009417885.1| PREDICTED: SUN domain-containing protein 3-like [Musa acuminata subsp. malaccensis]	XR_605115.1	PREDICTED: Phoenix dactylifera SUN domain-containing protein 2-like (LOC103713858), transcript variant X4, misc_RNA	K19347	SUN1_2	SUN domain-containing protein 1/2	Q9FF75	Protein SAD1/UNC-84 domain protein 1 OS=Arabidopsis thaliana GN=SUN1 PE=1 SV=1	PF08702//PF00435	Fibrinogen alpha/beta chain family//Spectrin repeat	GO:0051258//GO:0030168//GO:0007165	protein polymerization//platelet activation//signal transduction	GO:0005515//GO:0030674//GO:0005102	protein binding//protein binding, bridging//receptor binding	GO:0005577	fibrinogen complex	KOG2687
14	c173573_g2	270,3125581	1,924899846	7,1337	2,39E-27	4,38E-23	Up-regulated		CCA66188.1	hypothetical protein [Beta vulgaris subsp. vulgaris]	--	--	--	--	--	P08548	LINE-1 reverse transcriptase homolog OS=Nycticebus coucang PE=3 SV=1	--	--	--	--	--	--	--	--	--
15	c107597_g1	188,5634979	0	-	7,97E-26	1,36E-21	Up-regulated		--	--	--	--	--	--	--	--	--	--	--	--	--	--	--	--	--	--
16	c143295_g2	199,141868	0,333488125	9,2219	2,80E-25	4,45E-21	Up-regulated		--	--	--	--	--	--	--	--	--	--	--	--	--	--	--	--	--	--
17	c175026_g6	0,319058642	168,5979967	-9,0456	8,47E-25	1,26E-20	Down-regulated		--	--	--	--	--	--	--	--	--	PF03493//PF16557//PF16099	Calcium-activated BK potassium channel alpha subunit//CUT1-like DNA-binding domain of SATB//Recq-mediated genome instability protein 1, C-terminal OB-fold	GO:0006813	potassium ion transport	GO:0015269//GO:0000166//GO:0003677	calcium-activated potassium channel activity//nucleotide binding//DNA binding	GO:0016020	membrane	--
18	c172898_g1	0,265829582	161,0777135	-9,243	1,33E-23	1,87E-19	Down-regulated		--	--	--	--	--	--	--	--	--	PF04512	Baculovirus polyhedron envelope protein, PEP, N terminus	--	--	GO:0005198	structural molecule activity	GO:0019031//GO:0019028	viral envelope//viral capsid	--
19	c173149_g5	450,2606366	0,287471296	10,613	2,68E-23	3,54E-19	Up-regulated		--	--	--	--	--	--	--	--	--	--	--	--	--	--	--	--	--	--
20	c158349_g1	0,265829582	203,1593429	-9,5779	4,07E-23	4,85E-19	Down-regulated		XP_010269981.1	PREDICTED: aluminum-activated malate transporter 12-like [Nelumbo nucifera]	--	--	--	--	--	O49696	Aluminum-activated malate transporter 12 OS=Arabidopsis thaliana GN=ALMT12 PE=2 SV=1	PF04632//PF11744	Fusaric acid resistance protein family//Aluminium activated malate transporter	GO:0015743//GO:0006810	malate transport//transport	--	--	GO:0005886	plasma membrane	--
21	c167671_g1	1592,390765	76,98951798	4,3704	4,05E-23	4,85E-19	Up-regulated		KJB29513.1	hypothetical protein B456_005G104500 [Gossypium raimondii]	--	--	--	--	--	Q6AVI0	Zinc finger BED domain-containing protein RICESLEEPER 2 OS=Oryza sativa subsp. japonica GN=Os03g0733400 PE=2 SV=1	PF14372//PF07402//PF05699//PF02892	Domain of unknown function (DUF4413)//Human herpesvirus U26 protein//hAT family C-terminal dimerisation region//BED zinc finger	--	--	GO:0046983//GO:0003677	protein dimerization activity//DNA binding	GO:0016021	integral component of membrane	--
22	c149359_g1	155,7806202	0	-	4,35E-23	4,94E-19	Up-regulated		--	--	--	--	--	--	--	--	--	--	--	--	--	--	--	--	--	--
23	c174321_g3	3,069016026	322,5438986	-6,7156	1,96E-21	2,12E-17	Down-regulated		--	--	--	--	--	--	--	--	--	--	--	--	--	--	--	--	--	--
24	c42746_g1	6,852926605	285,0084458	-5,3781	2,78E-21	2,88E-17	Down-regulated		AIY34665.1	4-coumarate:CoA ligase-like protein [Ornithogalum longebracteatum]	AY389699.1	Hyacinthus orientalis AMP-binding protein mRNA, partial cds	--	--	--	Q8VZF1	Acetate/butyrate--CoA ligase AAE7, peroxisomal OS=Arabidopsis thaliana GN=AAE7 PE=1 SV=1	PF00501	AMP-binding enzyme	GO:0008152	metabolic process	GO:0003824	catalytic activity	--	--	KOG1176
25	c174750_g1	206,1220942	3,268538695	5,9787	6,67E-21	6,63E-17	Up-regulated		--	--	--	--	--	--	--	--	--	--	--	--	--	--	--	--	--	--
26	c168493_g2	150,9366417	0,620959421	7,9252	1,73E-20	1,65E-16	Up-regulated		--	--	--	--	--	--	--	--	--	--	--	--	--	--	--	--	--	--
27	c149905_g1	128,2031409	0	-	2,30E-20	2,11E-16	Up-regulated		XP_009776196.1	PREDICTED: uncharacterized protein LOC104226005 [Nicotiana sylvestris]	--	--	--	--	--	--	--	--	--	--	--	--	--	--	--	--
28	c177855_g1	157,3846243	1,443674885	6,7684	3,04E-20	2,68E-16	Up-regulated		XP_010934080.1	PREDICTED: glyoxylate/hydroxypyruvate reductase HPR3-like [Elaeis guineensis]	XM_008785364.1	PREDICTED: Phoenix dactylifera glyoxylate/hydroxypyruvate reductase HPR3-like (LOC103702799), mRNA	K15919	HPR2	hydroxypyruvate reductase 2	Q9LE33	Glyoxylate/hydroxypyruvate reductase HPR3 OS=Arabidopsis thaliana GN=HPR3 PE=2 SV=1	PF00899//PF00096//PF03446//PF13241//PF00389//PF07992//PF02826	ThiF family//Zinc finger, C2H2 type//NAD binding domain of 6-phosphogluconate dehydrogenase//Putative NAD(P)-binding//D-isomer specific 2-hydroxyacid dehydrogenase, catalytic domain//Pyridine nucleotide-disulphide oxidoreductase//D-isomer specific 2-hydroxyacid dehydrogenase, NAD binding domain	GO:0008152//GO:0006779//GO:0006098//GO:0055114//GO:0019521//GO:0019354	metabolic process//porphyrin-containing compound biosynthetic process//pentose-phosphate shunt//oxidation-reduction process//D-gluconate metabolic process//siroheme biosynthetic process	GO:0016491//GO:0004616//GO:0051287//GO:0008641//GO:0043115//GO:0046872//GO:0016616	oxidoreductase activity//phosphogluconate dehydrogenase (decarboxylating) activity//NAD binding//small protein activating enzyme activity//precorrin-2 dehydrogenase activity//metal ion binding//oxidoreductase activity, acting on the CH-OH group of donors, NAD or NADP as acceptor	--	--	KOG0069
29	c145536_g1	145,3214295	1,000464375	7,1824	3,04E-19	2,59E-15	Up-regulated		--	--	--	--	--	--	--	--	--	--	--	--	--	--	--	--	--	--
30	c149184_g1	4,61076446	204,8196948	-5,4732	4,50E-19	3,70E-15	Down-regulated		XP_009388880.1	PREDICTED: U3 small nucleolar RNA-associated protein 6 homolog [Musa acuminata subsp. malaccensis]	XM_008780326.1	PREDICTED: Phoenix dactylifera U3 small nucleolar RNA-associated protein 6 homolog (LOC103698328), transcript variant X2, mRNA	K14557	UTP6	U3 small nucleolar RNA-associated protein 6	Q02354	U3 small nucleolar RNA-associated protein 6 OS=Saccharomyces cerevisiae (strain ATCC 204508 / S288c) GN=UTP6 PE=1 SV=2	PF04904	NAB conserved region 1 (NCD1)	GO:0045892	negative regulation of transcription, DNA-templated	--	--	GO:0005634	nucleus	KOG2396
31	c171388_g4	210,1415746	6,589412625	4,9951	6,65E-19	5,28E-15	Up-regulated		--	--	--	--	--	--	--	--	--	--	--	--	--	--	--	--	--	--
32	c129929_g1	139,7216804	1,77716301	6,2968	6,38E-18	4,90E-14	Up-regulated		XP_010920789.1	PREDICTED: uncharacterized protein LOC105044559 [Elaeis guineensis]	--	--	--	--	--	--	--	PF06529	Vertebrate interleukin-3 regulated transcription factor	GO:0006351//GO:0007623	transcription, DNA-templated//circadian rhythm	--	--	GO:0005634	nucleus	--
33	c18901_g1	102,3700369	0	-	1,53E-17	1,14E-13	Up-regulated		XP_010917078.1	PREDICTED: cytochrome P450 704B1 [Elaeis guineensis]	--	--	--	--	--	Q9C788	Cytochrome P450 704B1 OS=Arabidopsis thaliana GN=CYP704B1 PE=2 SV=1	PF00067	Cytochrome P450	GO:0055114	oxidation-reduction process	GO:0020037//GO:0016705//GO:0005506	heme binding//oxidoreductase activity, acting on paired donors, with incorporation or reduction of molecular oxygen//iron ion binding	--	--	--
34	c160181_g1	0	90,43292912	-	2,03E-17	1,47E-13	Down-regulated		--	--	--	--	--	--	--	--	--	--	--	--	--	--	--	--	--	--
35	c155269_g1	58,47004452	733,7331855	-3,6495	2,34E-17	1,64E-13	Down-regulated		--	--	KC118825.1	Iris typhifolia voucher C. Wilson DBG05-35 RSA petL-psbE intergenic spacer, partial sequence; plastid	--	--	--	--	--	--	--	--	--	--	--	--	--	--
36	c118215_g1	45,17374815	611,3638289	-3,7585	2,88E-17	1,96E-13	Down-regulated		XP_010908889.1	PREDICTED: uncharacterized protein LOC105035148 [Elaeis guineensis]	--	--	--	--	--	--	--	--	--	--	--	--	--	--	--	--
37	c172399_g11	98,42933308	0	-	4,29E-17	2,84E-13	Up-regulated		--	--	--	--	--	--	--	--	--	--	--	--	--	--	--	--	--	--
38	c266162_g1	2,114862555	1456,049762	-9,4273	7,40E-17	4,77E-13	Down-regulated		XP_008809388.1	PREDICTED: sulfate transporter 3.1-like [Phoenix dactylifera]	XM_008809041.1	PREDICTED: Phoenix dactylifera sulfate transporter 3.1-like (LOC103719682), mRNA	K17471	SULTR3	sulfate transporter 3	Q9SV13	Sulfate transporter 3.1 OS=Arabidopsis thaliana GN=SULTR3;1 PE=2 SV=1	PF00916	Sulfate permease family	GO:0008272	sulfate transport	GO:0015116	sulfate transmembrane transporter activity	GO:0016021	integral component of membrane	KOG0236
39	c174183_g1	92,15678139	0	-	2,49E-16	1,56E-12	Up-regulated		--	--	--	--	--	--	--	--	--	--	--	--	--	--	--	--	--	--
40	c100441_g1	96,29709571	0	-	2,82E-16	1,73E-12	Up-regulated		XP_011079457.1	PREDICTED: uncharacterized protein LOC105162973 [Sesamum indicum]	--	--	--	--	--	--	--	--	--	--	--	--	--	--	--	--
41	c142341_g2	126,7638403	1,529390137	6,373	4,09E-16	2,44E-12	Up-regulated		--	--	--	--	--	--	--	--	--	--	--	--	--	--	--	--	--	--
42	c132864_g1	0	83,47463828	-	4,59E-16	2,66E-12	Down-regulated		--	--	--	--	--	--	--	--	--	--	--	--	--	--	--	--	--	--
43	c143554_g1	89,41765096	0	-	4,69E-16	2,66E-12	Up-regulated		--	--	--	--	--	--	--	--	--	--	--	--	--	--	--	--	--	--
44	c168493_g1	111,2892505	0,908430717	6,9367	6,84E-16	3,79E-12	Up-regulated		--	--	--	--	--	--	--	--	--	--	--	--	--	--	--	--	--	--
45	c171250_g5	263,8573499	11,86361852	4,4751	8,30E-16	4,49E-12	Up-regulated		XP_006475270.1	PREDICTED: uncharacterized protein LOC102625722 [Citrus sinensis]	XM_004309316.1	PREDICTED: Fragaria vesca subsp. vesca uncharacterized LOC101306581 (LOC101306581), mRNA	--	--	--	--	--	--	--	--	--	--	--	--	--	--
46	c149446_g1	84,79294936	0	-	1,85E-15	9,81E-12	Up-regulated		XP_009595604.1	PREDICTED: protein tesmin/TSO1-like CXC 5 isoform X4 [Nicotiana tomentosiformis]	--	--	--	--	--	Q9SZD1	Protein tesmin/TSO1-like CXC 5 OS=Arabidopsis thaliana GN=TCX5 PE=1 SV=1	PF07731	Multicopper oxidase	GO:0055114	oxidation-reduction process	GO:0005507//GO:0016491	copper ion binding//oxidoreductase activity	--	--	--
47	c165886_g1	165,4933475	6,535393419	4,6624	2,13E-15	1,10E-11	Up-regulated		XP_010933721.1	PREDICTED: vacuolar-processing enzyme [Elaeis guineensis]>gi|743827938|ref|XP_010933722.1| PREDICTED: vacuolar-processing enzyme [Elaeis guineensis]	AK357911.1	Hordeum vulgare subsp. vulgare mRNA for predicted protein, complete cds, clone: NIASHv1064L11	K01369	LGMN	legumain	P49045	Vacuolar-processing enzyme OS=Glycine max PE=2 SV=1	--	--	--	--	--	--	--	--	--
48	c167020_g7	0,797488747	94,38245138	-6,8869	2,71E-15	1,38E-11	Down-regulated		XP_010936356.1	PREDICTED: pentatricopeptide repeat-containing protein At3g29290 [Elaeis guineensis]>gi|743837303|ref|XP_010936357.1| PREDICTED: pentatricopeptide repeat-containing protein At3g29290 [Elaeis guineensis]	--	--	--	--	--	Q84J46	Pentatricopeptide repeat-containing protein At3g29290 OS=Arabidopsis thaliana GN=EMB2076 PE=2 SV=1	--	--	--	--	--	--	--	--	--
49	c171084_g5	92,66673966	0,333488125	8,1183	2,95E-15	1,46E-11	Up-regulated		--	--	--	--	--	--	--	--	--	PF04420//PF00204	CHD5-like protein//DNA gyrase B	GO:0006265//GO:0071816	DNA topological change//tail-anchored membrane protein insertion into ER membrane	GO:0003677//GO:0003918//GO:0005524	DNA binding//DNA topoisomerase type II (ATP-hydrolyzing) activity//ATP binding	--	--	--
50	c244905_g1	80,90830985	0	-	5,94E-15	2,89E-11	Up-regulated		--	--	--	--	--	--	--	--	--	--	--	--	--	--	--	--	--	--
51	c172707_g2	88,78503488	0,333488125	8,0565	7,57E-15	3,61E-11	Up-regulated		XP_008809273.1	PREDICTED: uncharacterized protein LOC103721024 [Phoenix dactylifera]	--	--	--	--	--	Q6F4F5	Cytochrome P450 724B1 OS=Oryza sativa subsp. japonica GN=CYP724B1 PE=1 SV=1	PF02531	PsaD	GO:0015979	photosynthesis	--	--	GO:0009522//GO:0009538	photosystem I//photosystem I reaction center	--
52	c139794_g1	88,36501932	0,287471296	8,2639	9,11E-15	4,26E-11	Up-regulated		--	--	--	--	--	--	--	--	--	--	--	--	--	--	--	--	--	--
53	c172142_g1	102,6396606	1,287935671	6,3164	2,54E-14	1,17E-10	Up-regulated		--	--	--	--	--	--	--	--	--	--	--	--	--	--	--	--	--	--
54	c31822_g1	138,5991876	4,510457537	4,9415	2,74E-14	1,23E-10	Up-regulated		XP_009342933.1	PREDICTED: uncharacterized protein LOC103934897 [Pyrus x bretschneideri]	--	--	--	--	--	--	--	--	--	--	--	--	--	--	--	--
55	c169196_g2	0,635094829	457,917833	-9,4939	2,84E-14	1,25E-10	Down-regulated		XP_010495244.1	PREDICTED: uncharacterized protein LOC104772312 [Camelina sativa]	--	--	--	--	--	--	--	--	--	--	--	--	--	--	--	--
56	c173539_g1	0,635094829	79,55809119	-6,9689	4,46E-14	1,93E-10	Down-regulated		XP_011087392.1	PREDICTED: uncharacterized protein LOC105168895 [Sesamum indicum]	--	--	--	--	--	--	--	PF04434	SWIM zinc finger	--	--	GO:0008270	zinc ion binding	--	--	--
57	c171465_g2	0,265829582	80,43745022	-8,2412	5,05E-14	2,15E-10	Down-regulated		XP_009759333.1	PREDICTED: uncharacterized protein LOC104211895 [Nicotiana sylvestris]	--	--	--	--	--	--	--	PF08159	NUC153 domain	--	--	--	--	GO:0005634	nucleus	--
58	c175343_g7	322,2534289	27,34653511	3,5588	2,34E-13	9,77E-10	Up-regulated		--	--	--	--	--	--	--	--	--	--	--	--	--	--	--	--	--	--
59	c170849_g2	176,3093509	9,292381615	4,2459	3,25E-13	1,34E-09	Up-regulated		--	--	--	--	--	--	--	--	--	--	--	--	--	--	--	--	--	--
60	c168097_g1	234,7468034	11,08987035	4,4038	5,21E-13	2,10E-09	Up-regulated		XP_012855474.1	PREDICTED: uncharacterized protein LOC105974861 [Erythranthe guttatus]	--	--	--	--	--	--	--	--	--	--	--	--	--	--	--	--
61	c167745_g2	0	97,50831921	-	5,99E-13	2,38E-09	Down-regulated		ABD63151.1	hypothetical protein 20.t00003 [Asparagus officinalis]	--	--	--	--	--	--	--	PF00296//PF04977//PF04963//PF04947	Luciferase-like monooxygenase//Septum formation initiator//Sigma-54 factor, core binding domain//Poxvirus Late Transcription Factor VLTF3 like	GO:0055114//GO:0046782//GO:0007049//GO:0006352	oxidation-reduction process//regulation of viral transcription//cell cycle//DNA-templated transcription, initiation	GO:0003677//GO:0016705	DNA binding//oxidoreductase activity, acting on paired donors, with incorporation or reduction of molecular oxygen	--	--	--
62	c163402_g3	66,12209098	0	-	6,15E-13	2,39E-09	Up-regulated		--	--	--	--	--	--	--	--	--	--	--	--	--	--	--	--	--	--
63	c170008_g2	66,27789629	0	-	6,20E-13	2,39E-09	Up-regulated		--	--	--	--	--	--	--	--	--	--	--	--	--	--	--	--	--	--
64	c161306_g1	0	125,7628676	-	6,60E-13	2,50E-09	Down-regulated		--	--	--	--	--	--	--	--	--	--	--	--	--	--	--	--	--	--
65	c172898_g3	65,4777008	0	-	8,55E-13	3,18E-09	Up-regulated		--	--	--	--	--	--	--	--	--	--	--	--	--	--	--	--	--	--
66	c163682_g1	0	103,132957	-	1,28E-12	4,64E-09	Down-regulated		XP_001772410.1	predicted protein [Physcomitrella patens]>gi|162676397|gb|EDQ62881.1| predicted protein [Physcomitrella patens]	XM_006662355.1	PREDICTED: Oryza brachyantha chaperonin CPN60-1, mitochondrial-like (LOC102709114), mRNA	K04077	groEL, HSPD1	chaperonin GroEL	Q8L7B5	Chaperonin CPN60-like 1, mitochondrial OS=Arabidopsis thaliana GN=At2g33210 PE=2 SV=1	--	--	GO:0042026	protein refolding	GO:0005524	ATP binding	GO:0005737	cytoplasm	KOG0356
67	c246455_g1	0	93,31078793	-	1,28E-12	4,64E-09	Down-regulated		--	--	--	--	--	--	--	--	--	PF04709	Anti-Mullerian hormone, N terminal region	GO:0007165//GO:0008406//GO:0008283//GO:0040007	signal transduction//gonad development//cell proliferation//growth	GO:0008083	growth factor activity	--	--	--
68	c173748_g2	64,2484224	0	-	1,46E-12	5,18E-09	Up-regulated		--	--	--	--	--	--	--	--	--	--	--	--	--	--	--	--	--	--
69	c15541_g2	63,28087549	0	-	1,84E-12	6,45E-09	Up-regulated		--	--	--	--	--	--	--	--	--	--	--	--	--	--	--	--	--	--
70	c171721_g5	73,72919229	0	-	2,05E-12	7,09E-09	Up-regulated		XP_010247624.1	PREDICTED: uncharacterized protein LOC104590605 [Nelumbo nucifera]	--	--	--	--	--	--	--	PF08675	RNA binding domain	GO:0051252//GO:0006402	regulation of RNA metabolic process//mRNA catabolic process	GO:0004535//GO:0003723//GO:0046872	poly(A)-specific ribonuclease activity//RNA binding//metal ion binding	GO:0005634//GO:0005737	nucleus//cytoplasm	--
71	c170590_g5	62,4437791	0	-	2,37E-12	8,05E-09	Up-regulated		XP_010445386.1	PREDICTED: uncharacterized protein LOC104728041 [Camelina sativa]	--	--	--	--	--	--	--	PF07822//PF01467	Neurotoxin B-IV-like protein//Cytidylyltransferase-like	GO:0009405//GO:0006810//GO:0009058	pathogenesis//transport//biosynthetic process	GO:0019871//GO:0003824	sodium channel inhibitor activity//catalytic activity	GO:0005576	extracellular region	--
72	c100441_g2	64,15048794	0	-	3,02E-12	1,02E-08	Up-regulated		XP_007031313.1	Uncharacterized protein TCM_016763 [Theobroma cacao]>gi|508710342|gb|EOY02239.1| Uncharacterized protein TCM_016763 [Theobroma cacao]	--	--	--	--	--	P11369	LINE-1 retrotransposable element ORF2 protein OS=Mus musculus GN=Pol PE=1 SV=2	--	--	--	--	--	--	--	--	--
73	c174719_g11	93,12063366	2,499842438	5,2192	3,19E-12	1,06E-08	Up-regulated		CAN76793.1	hypothetical protein VITISV_026680 [Vitis vinifera]	--	--	--	--	--	P0CT40	Transposon Tf2-9 polyprotein OS=Schizosaccharomyces pombe (strain 972 / ATCC 24843) GN=Tf2-9 PE=3 SV=1	PF00665	Integrase core domain	GO:0015074	DNA integration	--	--	--	--	KOG0017
74	c171478_g4	273,5091776	22,59335662	3,5976	3,38E-12	1,10E-08	Up-regulated		EEE53199.1	hypothetical protein OsJ_36071 [Oryza sativa Japonica Group]	--	--	--	--	--	--	--	--	--	--	--	--	--	--	--	--
75	c114394_g1	0	57,5364006	-	3,75E-12	1,21E-08	Down-regulated		--	--	--	--	--	--	--	--	--	--	--	--	--	--	--	--	--	--
76	c177905_g1	60,67648091	0	-	4,73E-12	1,50E-08	Up-regulated		--	--	--	--	--	--	--	--	--	--	--	--	--	--	--	--	--	--
77	c171250_g1	67,22113508	0,287471296	7,8694	4,85E-12	1,52E-08	Up-regulated		--	--	--	--	--	--	--	--	--	--	--	--	--	--	--	--	--	--
78	c170109_g6	0,638117285	67,69846753	-6,7292	5,44E-12	1,68E-08	Down-regulated		--	--	--	--	--	--	--	--	--	PF01372//PF01612	Melittin//3'-5' exonuclease	GO:0045859//GO:0006139	regulation of protein kinase activity//nucleobase-containing compound metabolic process	GO:0008408//GO:0004860//GO:0003676	3'-5' exonuclease activity//protein kinase inhibitor activity//nucleic acid binding	GO:0005576	extracellular region	--
79	c161624_g2	76,26538579	0	-	6,14E-12	1,88E-08	Up-regulated		--	--	--	--	--	--	--	--	--	PF07392//PF10717	Cyclin-dependent kinase inhibitor 2a p19Arf N-terminus//Occlusion-derived virus envelope protein ODV-E18	GO:0008285//GO:0006915//GO:0007050	negative regulation of cell proliferation//apoptotic process//cell cycle arrest	--	--	GO:0019031	viral envelope	--
80	c116544_g1	74,49763162	0,954447546	6,2864	1,55E-11	4,69E-08	Up-regulated		--	--	--	--	--	--	--	--	--	--	--	--	--	--	--	--	--	--
81	c174751_g2	692,1925909	95,21294714	2,8619	1,70E-11	5,01E-08	Up-regulated		CDX79446.1	BnaC03g17820D [Brassica napus]	--	--	--	--	--	F4IRU3	Myosin-12 OS=Arabidopsis thaliana GN=XI-F PE=2 SV=1	PF02230//PF00063	Phospholipase/Carboxylesterase//Myosin head (motor domain)	--	--	GO:0005524//GO:0016787//GO:0003774	ATP binding//hydrolase activity//motor activity	GO:0016459	myosin complex	--
82	c289276_g1	1,270189659	71,68768822	-5,8186	1,69E-11	5,01E-08	Down-regulated		XP_010464785.1	PREDICTED: uncharacterized protein LOC104745284 [Camelina sativa]	--	--	--	--	--	--	--	PF13897	Golgi-dynamics membrane-trafficking	GO:0006810	transport	--	--	GO:0016021	integral component of membrane	--
83	c172003_g3	0	51,17675866	-	2,05E-11	5,96E-08	Down-regulated		--	--	--	--	--	--	--	--	--	--	--	--	--	--	--	--	--	--
84	c77885_g1	55,82515391	0	-	2,26E-11	6,49E-08	Up-regulated		--	--	--	--	--	--	--	--	--	--	--	--	--	--	--	--	--	--
85	c169601_g2	55,42457671	0	-	3,05E-11	8,66E-08	Up-regulated		--	--	--	--	--	--	--	--	--	--	--	--	--	--	--	--	--	--
86	c169295_g4	212,4617534	1,102184382	7,5907	3,29E-11	9,14E-08	Up-regulated		--	--	--	--	--	--	--	--	--	--	--	--	--	--	--	--	--	--
87	c203624_g1	54,65690906	0	-	3,30E-11	9,14E-08	Up-regulated		--	--	--	--	--	--	--	--	--	--	--	--	--	--	--	--	--	--
88	c132334_g1	54,00517036	0	-	4,32E-11	1,18E-07	Up-regulated		XP_002310263.1	hypothetical protein POPTR_0007s13310g [Populus trichocarpa]>gi|222853166|gb|EEE90713.1| hypothetical protein POPTR_0007s13310g [Populus trichocarpa]	--	--	--	--	--	--	--	PF02123	Viral RNA-directed RNA-polymerase	GO:0006144//GO:0006351	purine nucleobase metabolic process//transcription, DNA-templated	GO:0003968//GO:0003723	RNA-directed RNA polymerase activity//RNA binding	GO:0031379	RNA-directed RNA polymerase complex	--
89	c4597_g1	53,2994309	0	-	7,13E-11	1,93E-07	Up-regulated		--	--	--	--	--	--	--	--	--	--	--	--	--	--	--	--	--	--
90	c162798_g2	1172,512062	6762,607117	-2,528	7,52E-11	2,01E-07	Down-regulated		XP_008782021.1	PREDICTED: protein ASPARTIC PROTEASE IN GUARD CELL 2-like [Phoenix dactylifera]	XM_010928681.1	PREDICTED: Elaeis guineensis protein ASPARTIC PROTEASE IN GUARD CELL 2-like (LOC105049122), mRNA	--	--	--	Q9LS40	Protein ASPARTIC PROTEASE IN GUARD CELL 1 OS=Arabidopsis thaliana GN=ASPG1 PE=1 SV=1	PF00026	Eukaryotic aspartyl protease	GO:0006508	proteolysis	GO:0004190	aspartic-type endopeptidase activity	--	--	KOG1339
91	c169630_g2	71,54373763	1,195902012	5,9027	1,07E-10	2,83E-07	Up-regulated		--	--	--	--	--	--	--	--	--	PF00260	Protamine P1	GO:0007283	spermatogenesis	GO:0003677	DNA binding	GO:0005634//GO:0000786	nucleus//nucleosome	--
92	c171970_g3	0,316036187	52,20555113	-7,368	1,18E-10	3,09E-07	Down-regulated		--	--	--	--	--	--	--	--	--	PF07127//PF16045	Late nodulin protein//LisH	GO:0009878	nodule morphogenesis	GO:0005515//GO:0046872	protein binding//metal ion binding	--	--	--
93	c161809_g1	0	61,5760631	-	1,28E-10	3,32E-07	Down-regulated		XP_002445305.1	hypothetical protein SORBIDRAFT_07g008565 [Sorghum bicolor]>gi|241941655|gb|EES14800.1| hypothetical protein SORBIDRAFT_07g008565, partial [Sorghum bicolor]	--	--	--	--	--	--	--	--	--	--	--	GO:0003676	nucleic acid binding	--	--	--
94	c106022_g1	51,32634878	0	-	1,31E-10	3,35E-07	Up-regulated		--	--	--	--	--	--	--	--	--	--	--	--	--	--	--	--	--	--
95	c174627_g3	62,54125759	0,814713087	6,2624	1,47E-10	3,72E-07	Up-regulated		--	--	XM_010102959.1	Morus notabilis 40S ribosomal protein SA partial mRNA	--	--	--	--	--	PF00050	Kazal-type serine protease inhibitor domain	--	--	GO:0005515	protein binding	--	--	--
96	c171572_g1	149,4638543	0	-	1,52E-10	3,81E-07	Up-regulated		XP_003561709.1	PREDICTED: peroxisomal membrane protein 11-3 [Brachypodium distachyon]	--	--	--	--	--	Q10MN2	Peroxisomal membrane protein 11-3 OS=Oryza sativa subsp. japonica GN=PEX11-3 PE=2 SV=1	PF05648	Peroxisomal biogenesis factor 11 (PEX11)	GO:0016559	peroxisome fission	--	--	GO:0005779	integral component of peroxisomal membrane	--
97	c15541_g1	50,46376914	0	-	1,58E-10	3,93E-07	Up-regulated		--	--	--	--	--	--	--	--	--	--	--	--	--	--	--	--	--	--
98	c174807_g4	128,843462	3,927512568	5,0359	1,65E-10	4,05E-07	Up-regulated		--	--	--	--	--	--	--	--	--	--	--	--	--	--	--	--	--	--
99	c246593_g1	50,83496943	0	-	1,66E-10	4,05E-07	Up-regulated		--	--	--	--	--	--	--	--	--	--	--	--	--	--	--	--	--	--
100	c172091_g6	0,265829582	51,14674658	-7,588	2,17E-10	5,22E-07	Down-regulated		--	--	--	--	--	--	--	--	--	--	--	--	--	--	--	--	--	--
101	c160891_g1	60,58049328	0,66697625	6,5051	2,25E-10	5,35E-07	Up-regulated		CAX68207.1	Copia-like retrotransposon [Helianthus annuus]	AP007302.1	Lotus japonicus genomic DNA, chromosome 2, clone: LjT10F20, TM0796, complete sequence	--	--	--	P10978	Retrovirus-related Pol polyprotein from transposon TNT 1-94 OS=Nicotiana tabacum PE=2 SV=1	--	--	--	--	--	--	--	--	--
102	c171610_g3	50,0435256	0	-	2,27E-10	5,35E-07	Up-regulated		XP_010943345.1	PREDICTED: DNA-directed RNA polymerase 2B, chloroplastic/mitochondrial isoform X1 [Elaeis guineensis]	--	--	K10908	POLRMT, RPO41	DNA-directed RNA polymerase, mitochondrial	Q8L6J3	DNA-directed RNA polymerase 2B, chloroplastic/mitochondrial OS=Nicotiana tabacum GN=RPOT2-TOM PE=2 SV=2	--	--	--	--	--	--	--	--	--
103	c127746_g2	0	45,33866702	-	2,34E-10	5,48E-07	Down-regulated		--	--	--	--	--	--	--	--	--	--	--	--	--	--	--	--	--	--
104	c170490_g2	70,47301826	0,620959421	6,8264	2,82E-10	6,52E-07	Up-regulated		--	--	--	--	--	--	--	--	--	--	--	--	--	--	--	--	--	--
105	c21149_g1	54,33329637	0,333488125	7,3481	3,52E-10	8,08E-07	Up-regulated		CDP14239.1	unnamed protein product [Coffea canephora]	--	--	--	--	--	--	--	PF00098	Zinc knuckle	--	--	GO:0008270//GO:0003676	zinc ion binding//nucleic acid binding	--	--	--
106	c158534_g1	22,39549498	260,0343266	-3,5374	3,61E-10	8,20E-07	Down-regulated		XP_009404662.1	PREDICTED: phosphopantetheine adenylyltransferase-like isoform X1 [Musa acuminata subsp. malaccensis]>gi|694998452|ref|XP_009404671.1| PREDICTED: phosphopantetheine adenylyltransferase-like isoform X1 [Musa acuminata subsp. malaccensis]>gi|694998454|ref|XP_009404677.1| PREDICTED: phosphopantetheine adenylyltransferase-like isoform X2 [Musa acuminata subsp. malaccensis]>gi|694998456|ref|XP_0094046…	--	--	K02201	E2.7.7.3B	pantetheine-phosphate adenylyltransferase	Q9ZPV8	Phosphopantetheine adenylyltransferase OS=Arabidopsis thaliana GN=COAD PE=1 SV=1	PF06574//PF01467	FAD synthetase//Cytidylyltransferase-like	GO:0009058//GO:0009231//GO:0006771	biosynthetic process//riboflavin biosynthetic process//riboflavin metabolic process	GO:0003824//GO:0003919	catalytic activity//FMN adenylyltransferase activity	--	--	KOG3351
107	c131825_g1	47,76293095	0	-	5,17E-10	1,16E-06	Up-regulated		XP_002311170.2	hypothetical protein POPTR_0008s05660g [Populus trichocarpa]>gi|550332493|gb|EEE88537.2| hypothetical protein POPTR_0008s05660g [Populus trichocarpa]	--	--	K06941	rlmN	23S rRNA (adenine2503-C2)-methyltransferase	B2J6D0	Probable dual-specificity RNA methyltransferase RlmN OS=Nostoc punctiforme (strain ATCC 29133 / PCC 73102) GN=rlmN PE=3 SV=1	--	--	--	--	--	--	--	--	--
108	c114472_g1	10,12245333	371,4901013	-5,1977	5,52E-10	1,23E-06	Down-regulated		--	--	--	--	--	--	--	--	--	PF05964	F/Y-rich N-terminus	--	--	--	--	GO:0005634	nucleus	--
109	c164081_g1	46,02933573	0	-	8,40E-10	1,85E-06	Up-regulated		--	--	--	--	--	--	--	--	--	--	--	--	--	--	--	--	--	--
110	c170945_g3	0	44,0459929	-	8,44E-10	1,85E-06	Down-regulated		XP_010943831.1	PREDICTED: LOW QUALITY PROTEIN: pentatricopeptide repeat-containing protein At4g21065-like [Elaeis guineensis]	--	--	--	--	--	--	--	--	--	--	--	--	--	--	--	--
111	c117735_g1	191,5971916	16,67333516	3,5225	8,71E-10	1,87E-06	Up-regulated		--	--	XM_005821197.1	Guillardia theta CCMP2712 hypothetical protein (GUITHDRAFT_119564) mRNA, complete cds	--	--	--	--	--	--	--	--	--	--	--	--	--	--
112	c175789_g2	0	43,89825606	-	8,70E-10	1,87E-06	Down-regulated		XP_010911854.1	PREDICTED: uncharacterized protein LOC105037921 [Elaeis guineensis]	--	--	--	--	--	--	--	--	--	--	--	--	--	--	--	--
113	c100268_g1	0,265829582	196,3258908	-9,5285	9,66E-10	2,06E-06	Down-regulated		--	--	--	--	--	--	--	--	--	--	--	--	--	--	--	--	--	--
114	c174586_g1	966,5232677	159,4884285	2,5994	1,03E-09	2,16E-06	Up-regulated		CCA65997.1	hypothetical protein [Beta vulgaris subsp. vulgaris]	--	--	--	--	--	P08548	LINE-1 reverse transcriptase homolog OS=Nycticebus coucang PE=3 SV=1	PF01589	Alphavirus E1 glycoprotein	--	--	GO:0004252	serine-type endopeptidase activity	GO:0019028//GO:0055036	viral capsid//virion membrane	KOG1075
115	c156093_g1	0	41,81803448	-	1,08E-09	2,26E-06	Down-regulated		KEH20857.1	trehalose-phosphate phosphatase [Medicago truncatula]	--	--	--	--	--	Q67X99	Probable trehalose-phosphate phosphatase E OS=Arabidopsis thaliana GN=TPPE PE=2 SV=1	--	--	--	--	--	--	--	--	--
116	c100628_g1	45,60476612	0	-	1,11E-09	2,30E-06	Up-regulated		--	--	--	--	--	--	--	--	--	--	--	--	--	--	--	--	--	--
117	c152870_g1	0	41,36081665	-	1,60E-09	3,28E-06	Down-regulated		CAN75292.1	hypothetical protein VITISV_014745 [Vitis vinifera]	AM477213.1	Vitis vinifera, whole genome shotgun sequence, contig VV78X036932.12, clone ENTAV 115	--	--	--	P10978	Retrovirus-related Pol polyprotein from transposon TNT 1-94 OS=Nicotiana tabacum PE=2 SV=1	PF02115//PF00706	RHO protein GDP dissociation inhibitor//Anenome neurotoxin	GO:0009966	regulation of signal transduction	GO:0005094	Rho GDP-dissociation inhibitor activity	GO:0005576//GO:0005737	extracellular region//cytoplasm	--
118	c143608_g1	249,1640202	28,98797117	3,1036	1,65E-09	3,36E-06	Up-regulated		XP_009411666.1	PREDICTED: bidirectional sugar transporter SWEET16-like isoform X1 [Musa acuminata subsp. malaccensis]	--	--	K15382	SLC50A, SWEET	solute carrier family 50 (sugar transporter)	Q84WN3	Bidirectional sugar transporter SWEET17 OS=Arabidopsis thaliana GN=SWEET17 PE=2 SV=2	PF03083//PF01292	Sugar efflux transporter for intercellular exchange//Prokaryotic cytochrome b561	GO:0006118	obsolete electron transport	GO:0009055	electron carrier activity	GO:0016021	integral component of membrane	--
119	c173207_g3	8,837467114	111,6976986	-3,6598	1,92E-09	3,89E-06	Down-regulated		XP_008776572.1	PREDICTED: probable glutamate carboxypeptidase 2, partial [Phoenix dactylifera]	--	--	--	--	--	--	--	--	--	--	--	--	--	--	--	--
120	c271696_g1	0	40,00381005	-	2,00E-09	4,01E-06	Down-regulated		XP_009416204.1	PREDICTED: probable envelope ADP,ATP carrier protein, chloroplastic isoform X1 [Musa acuminata subsp. malaccensis]	XM_003529101.2	PREDICTED: Glycine max thylakoid ADP,ATP carrier protein, chloroplastic-like (LOC100778912), mRNA	--	--	--	O65023	Probable envelope ADP,ATP carrier protein, chloroplastic OS=Arabidopsis thaliana GN=EAAC PE=2 SV=2	--	--	--	--	--	--	--	--	--
121	c69830_g1	43,53072709	0	-	2,36E-09	4,70E-06	Up-regulated		--	--	--	--	--	--	--	--	--	--	--	--	--	--	--	--	--	--
122	c44633_g1	49,33102206	0,287471296	7,4229	2,51E-09	4,94E-06	Up-regulated		--	--	--	--	--	--	--	--	--	--	--	--	--	--	--	--	--	--
123	c174028_g5	0	39,90672448	-	2,54E-09	4,95E-06	Down-regulated		--	--	--	--	--	--	--	--	--	PF06357	Omega-atracotoxin	GO:0006952//GO:0006810//GO:0009405	defense response//transport//pathogenesis	GO:0019855	calcium channel inhibitor activity	GO:0005576	extracellular region	--
124	c146598_g1	64,38713963	0	-	3,05E-09	5,86E-06	Up-regulated		--	--	--	--	--	--	--	--	--	--	--	--	--	--	--	--	--	--
125	c163280_g4	0	40,78714055	-	3,04E-09	5,86E-06	Down-regulated		XP_009405386.1	PREDICTED: nucleolar complex protein 3 homolog [Musa acuminata subsp. malaccensis]>gi|695035905|ref|XP_009405387.1| PREDICTED: nucleolar complex protein 3 homolog [Musa acuminata subsp. malaccensis]>gi|695035907|ref|XP_009405388.1| PREDICTED: nucleolar complex protein 3 homolog [Musa acuminata subsp. malaccensis]>gi|695035909|ref|XP_009405389.1| PREDICTED: nucleolar complex protein 3 homolog [Mus…	--	--	K14834	NOC3	nucleolar complex protein 3	--	--	--	--	--	--	--	--	--	--	--
126	c175378_g1	271,5719615	4081,518285	-3,9097	4,22E-09	8,05E-06	Down-regulated		XP_010911437.1	PREDICTED: cytochrome P450 86B1-like [Elaeis guineensis]	XM_004985705.2	PREDICTED: Setaria italica alkane hydroxylase MAH1-like (LOC101782968), mRNA	--	--	--	Q9FMY1	Cytochrome P450 86B1 OS=Arabidopsis thaliana GN=CYP86B1 PE=2 SV=1	PF00067	Cytochrome P450	GO:0055114	oxidation-reduction process	GO:0020037//GO:0016705//GO:0005506	heme binding//oxidoreductase activity, acting on paired donors, with incorporation or reduction of molecular oxygen//iron ion binding	--	--	--
127	c115664_g1	0	37,41698587	-	4,46E-09	8,44E-06	Down-regulated		--	--	--	--	--	--	--	--	--	--	--	--	--	--	--	--	--	--
128	c157935_g4	93,04322496	8,180824346	3,5076	5,03E-09	9,45E-06	Up-regulated		--	--	--	--	--	--	--	--	--	--	--	--	--	--	--	--	--	--
129	c153353_g1	10,47994447	113,6479761	-3,4389	5,56E-09	1,04E-05	Down-regulated		--	--	--	--	--	--	--	--	--	--	--	--	--	--	--	--	--	--
130	c15408_g1	0	46,45907568	-	6,55E-09	1,21E-05	Down-regulated		XP_007203452.1	hypothetical protein PRUPE_ppa022115mg [Prunus persica]>gi|462398983|gb|EMJ04651.1| hypothetical protein PRUPE_ppa022115mg [Prunus persica]	--	--	--	--	--	P0C2F6	Putative ribonuclease H protein At1g65750 OS=Arabidopsis thaliana GN=At1g65750 PE=3 SV=1	--	--	--	--	--	--	--	--	--
131	c156940_g2	0	37,1251936	-	6,81E-09	1,25E-05	Down-regulated		--	--	--	--	--	--	--	--	--	--	--	--	--	--	--	--	--	--
132	c116864_g1	1463,887116	129,6235287	3,4974	7,05E-09	1,28E-05	Up-regulated		XP_008801184.1	PREDICTED: beta-glucosidase 31-like [Phoenix dactylifera]	XM_008802991.1	PREDICTED: Phoenix dactylifera beta-glucosidase 31-like (LOC103715381), mRNA	K01188	E3.2.1.21	beta-glucosidase	B7F7K7	Beta-glucosidase 31 OS=Oryza sativa subsp. japonica GN=BGLU31 PE=2 SV=1	PF00150//PF00232	Cellulase (glycosyl hydrolase family 5)//Glycosyl hydrolase family 1	GO:0005975	carbohydrate metabolic process	GO:0004553	hydrolase activity, hydrolyzing O-glycosyl compounds	--	--	--
133	c176340_g1	443,6532184	81,75469371	2,4401	7,86E-09	1,42E-05	Up-regulated		XP_012855090.1	PREDICTED: uncharacterized protein LOC105974520 [Erythranthe guttatus]	--	--	--	--	--	--	--	--	--	--	--	--	--	--	--	--
134	c169051_g1	53,72152176	1,148201212	5,5481	8,03E-09	1,44E-05	Up-regulated		CAN68340.1	hypothetical protein VITISV_025981 [Vitis vinifera]	--	--	--	--	--	P10978	Retrovirus-related Pol polyprotein from transposon TNT 1-94 OS=Nicotiana tabacum PE=2 SV=1	PF00665	Integrase core domain	GO:0015074	DNA integration	--	--	--	--	--
135	c167890_g2	39,39744558	0	-	1,06E-08	1,88E-05	Up-regulated		XP_004244096.1	PREDICTED: endoglucanase 11-like [Solanum lycopersicum]	--	--	--	--	--	Q84Q51	Endoglucanase 21 OS=Oryza sativa subsp. japonica GN=GLU9 PE=2 SV=1	PF00759	Glycosyl hydrolase family 9	GO:0005975	carbohydrate metabolic process	GO:0004553	hydrolase activity, hydrolyzing O-glycosyl compounds	--	--	--
136	c167389_g1	65,11678375	389,858633	-2,5818	1,11E-08	1,96E-05	Down-regulated		XP_008783138.1	PREDICTED: probable transcription factor GLK1 [Phoenix dactylifera]	XM_011049395.1	PREDICTED: Populus euphratica transcription activator GLK1-like (LOC105141969), mRNA	--	--	--	Q9SIV3	Transcription activator GLK1 OS=Arabidopsis thaliana GN=GLK1 PE=1 SV=2	--	--	--	--	--	--	--	--	--
137	c6201_g1	0	42,07591119	-	1,13E-08	1,97E-05	Down-regulated		--	--	--	--	--	--	--	--	--	--	--	--	--	--	--	--	--	--
138	c173486_g2	112,7157892	11,90658087	3,2429	1,18E-08	2,05E-05	Up-regulated		XP_003638432.1	Craniofacial development protein [Medicago truncatula]	--	--	--	--	--	--	--	--	--	--	--	--	--	--	--	--
139	c117042_g1	192,198227	929,5848782	-2,274	1,39E-08	2,40E-05	Down-regulated		XP_010935530.1	PREDICTED: probable acyl-activating enzyme 5, peroxisomal [Elaeis guineensis]	XM_004288516.2	PREDICTED: Fragaria vesca subsp. vesca probable acyl-activating enzyme 5, peroxisomal (LOC101314025), mRNA	--	--	--	Q9FFE6	Probable acyl-activating enzyme 5, peroxisomal OS=Arabidopsis thaliana GN=AAE5 PE=2 SV=1	PF00501	AMP-binding enzyme	GO:0008152	metabolic process	GO:0003824	catalytic activity	--	--	KOG1176
140	c174807_g6	61,50031233	1,537392515	5,322	1,40E-08	2,41E-05	Up-regulated		--	--	--	--	--	--	--	--	--	--	--	--	--	--	--	--	--	--
141	c289769_g1	59,8466923	0,481224962	6,9584	1,43E-08	2,44E-05	Up-regulated		XP_008780214.1	PREDICTED: UPF0481 protein At3g47200-like, partial [Phoenix dactylifera]	--	--	--	--	--	Q9SD53	UPF0481 protein At3g47200 OS=Arabidopsis thaliana GN=At3g47200 PE=2 SV=1	--	--	--	--	--	--	--	--	--
142	c67744_g1	0,265829582	40,31138499	-7,2445	1,45E-08	2,46E-05	Down-regulated		XP_010265882.1	PREDICTED: selenoprotein O-like [Nelumbo nucifera]	--	--	--	--	--	Q7UKT5	UPF0061 protein RB9953 OS=Rhodopirellula baltica (strain SH1) GN=RB9953 PE=3 SV=1	--	--	--	--	--	--	--	--	KOG2542
143	c158202_g1	83,76590049	4,77223773	4,1336	1,54E-08	2,58E-05	Up-regulated		XP_010260769.1	PREDICTED: organic cation/carnitine transporter 3-like [Nelumbo nucifera]	--	--	--	--	--	O64515	Organic cation/carnitine transporter 2 OS=Arabidopsis thaliana GN=OCT2 PE=2 SV=1	PF00083//PF07690	Sugar (and other) transporter//Major Facilitator Superfamily	GO:0055085	transmembrane transport	GO:0022857	transmembrane transporter activity	GO:0016021	integral component of membrane	--
144	c171523_g1	52,26872815	0,908430717	5,8464	1,55E-08	2,58E-05	Up-regulated		XP_012836542.1	PREDICTED: uncharacterized protein LOC105957167 [Erythranthe guttatus]	--	--	--	--	--	--	--	--	--	--	--	--	--	--	--	--
145	c22048_g1	43,46779923	0,333488125	7,0262	1,72E-08	2,84E-05	Up-regulated		XP_007017131.1	Uncharacterized protein TCM_033752 [Theobroma cacao]>gi|508722459|gb|EOY14356.1| Uncharacterized protein TCM_033752 [Theobroma cacao]	--	--	--	--	--	O00370	LINE-1 retrotransposable element ORF2 protein OS=Homo sapiens PE=1 SV=1	--	--	--	--	--	--	--	--	KOG1075
146	c161843_g2	6,894065843	89,44720301	-3,6976	1,78E-08	2,93E-05	Down-regulated		--	--	--	--	--	--	--	--	--	--	--	--	--	--	--	--	--	--
147	c291496_g1	25,36797967	181,9273912	-2,8423	1,91E-08	3,11E-05	Down-regulated		XP_010920666.1	PREDICTED: short-chain dehydrogenase TIC 32, chloroplastic-like [Elaeis guineensis]	XM_008812580.1	PREDICTED: Phoenix dactylifera short-chain dehydrogenase TIC 32, chloroplastic-like (LOC103722136), mRNA	--	--	--	Q6RVV4	Short-chain dehydrogenase TIC 32, chloroplastic OS=Pisum sativum GN=TIC32 PE=1 SV=1	PF00106//PF01370	short chain dehydrogenase//NAD dependent epimerase/dehydratase family	GO:0008152	metabolic process	GO:0003824//GO:0016491//GO:0050662	catalytic activity//oxidoreductase activity//coenzyme binding	--	--	KOG1208
148	c168732_g2	279,0949246	1349,805025	-2,2739	1,92E-08	3,12E-05	Down-regulated		XP_008792869.1	PREDICTED: subtilisin-like protease [Phoenix dactylifera]	NM_001054836.1	Oryza sativa Japonica Group Os02g0779200 (Os02g0779200) mRNA, complete cds	--	--	--	O65351	Subtilisin-like protease SBT1.7 OS=Arabidopsis thaliana GN=SBT1.7 PE=1 SV=1	PF00082//PF03839	Subtilase family//Translocation protein Sec62	GO:0006508//GO:0015031	proteolysis//protein transport	GO:0008565//GO:0004252	protein transporter activity//serine-type endopeptidase activity	GO:0016021	integral component of membrane	--
149	c175251_g3	3,494217071	68,21348999	-4,287	2,01E-08	3,24E-05	Down-regulated		--	--	KF264502.1	Nietneria paniculata voucher Hokche &amp; Maas 849 (U) NADH dehydrogenase subunit 1 (NAD1) gene, intron 2; mitochondrial	--	--	--	--	--	--	--	--	--	--	--	--	--	--
150	c106753_g1	135,2211682	736,1136501	-2,4446	2,28E-08	3,65E-05	Down-regulated		XP_009395677.1	PREDICTED: LOW QUALITY PROTEIN: probable acyl-activating enzyme 5, peroxisomal [Musa acuminata subsp. malaccensis]	CR936257.1	Natronomonas pharaonis DSM 2160 complete genome	--	--	--	Q9FFE9	Probable acyl-activating enzyme 6 OS=Arabidopsis thaliana GN=AAE6 PE=2 SV=1	PF00501	AMP-binding enzyme	GO:0008152	metabolic process	GO:0003824	catalytic activity	--	--	KOG1176
151	c115490_g1	308,2178711	65,58907025	2,2324	2,53E-08	4,03E-05	Up-regulated		XP_010909504.1	PREDICTED: UPF0481 protein At3g47200-like [Elaeis guineensis]	--	--	--	--	--	Q9SD53	UPF0481 protein At3g47200 OS=Arabidopsis thaliana GN=At3g47200 PE=2 SV=1	--	--	--	--	--	--	--	--	--
152	c173928_g3	122,9757728	12,99612844	3,2422	2,58E-08	4,07E-05	Up-regulated		XP_008245529.1	PREDICTED: LOW QUALITY PROTEIN: uncharacterized protein LOC103343662 [Prunus mume]	--	--	--	--	--	O00370	LINE-1 retrotransposable element ORF2 protein OS=Homo sapiens PE=1 SV=1	PF07516//PF07733	SecA Wing and Scaffold domain//Bacterial DNA polymerase III alpha subunit	GO:0017038//GO:0006260	protein import//DNA replication	GO:0008408	3'-5' exonuclease activity	GO:0016020	membrane	KOG1075
153	c123648_g1	37,37122213	477,2445149	-3,6747	2,68E-08	4,21E-05	Down-regulated		XP_012570493.1	PREDICTED: uncharacterized protein LOC101511025 [Cicer arietinum]	--	--	--	--	--	--	--	PF07646//PF16588//PF00098	Kelch motif//C2H2 zinc-finger//Zinc knuckle	--	--	GO:0003676//GO:0005515//GO:0008270	nucleic acid binding//protein binding//zinc ion binding	--	--	--
154	c173131_g1	133,413099	640,6272348	-2,2636	2,87E-08	4,47E-05	Down-regulated		XP_008452950.1	PREDICTED: small nuclear ribonucleoprotein Sm D3-like [Cucumis melo]	XM_010943110.1	PREDICTED: Elaeis guineensis small nuclear ribonucleoprotein Sm D3-like (LOC105059697), mRNA	K11088	SNRPD3, SMD3	small nuclear ribonucleoprotein D3	Q9LM92	Small nuclear ribonucleoprotein SmD3b OS=Arabidopsis thaliana GN=SMD3B PE=2 SV=1	--	--	--	--	--	--	--	--	KOG3172
155	c131372_g1	42,45595038	0,333488125	6,9922	3,10E-08	4,79E-05	Up-regulated		XP_007046404.1	Uncharacterized protein TCM_011923 [Theobroma cacao]>gi|508710339|gb|EOY02236.1| Uncharacterized protein TCM_011923 [Theobroma cacao]	--	--	--	--	--	P14381	Transposon TX1 uncharacterized 149 kDa protein OS=Xenopus laevis PE=3 SV=1	--	--	--	--	--	--	--	--	--
156	c17086_g1	41,89700138	0,333488125	6,9731	3,20E-08	4,92E-05	Up-regulated		CAN76679.1	hypothetical protein VITISV_034325 [Vitis vinifera]	--	--	--	--	--	P10978	Retrovirus-related Pol polyprotein from transposon TNT 1-94 OS=Nicotiana tabacum PE=2 SV=1	PF03082	Male accessory gland secretory protein	GO:0007618	mating	--	--	GO:0005576	extracellular region	--
157	c277789_g1	0	33,74988299	-	3,34E-08	5,10E-05	Down-regulated		--	--	--	--	--	--	--	--	--	--	--	--	--	--	--	--	--	--
158	c170525_g1	0	86,8997652	-	3,46E-08	5,26E-05	Down-regulated		XP_007152976.1	hypothetical protein PHAVU_004G176100g [Phaseolus vulgaris]>gi|561026285|gb|ESW24970.1| hypothetical protein PHAVU_004G176100g [Phaseolus vulgaris]	--	--	--	--	--	Q9AXT8	DNA (cytosine-5)-methyltransferase 1 OS=Zea mays GN=MET2A PE=1 SV=1	--	--	--	--	--	--	--	--	--
159	c107786_g1	37,22132149	0	-	3,50E-08	5,27E-05	Up-regulated		--	--	--	--	--	--	--	--	--	--	--	--	--	--	--	--	--	--
160	c169850_g1	383,2831744	72,43142432	2,4037	3,66E-08	5,49E-05	Up-regulated		XP_008777844.1	PREDICTED: single myb histone 6-like [Phoenix dactylifera]	--	--	--	--	--	--	--	--	--	--	--	--	--	--	--	--
161	c162124_g1	4,197653238	141,4915596	-5,075	3,80E-08	5,66E-05	Down-regulated		--	--	--	--	--	--	--	--	--	--	--	--	--	--	--	--	--	--
162	c173312_g8	36,63666125	0	-	3,84E-08	5,69E-05	Up-regulated		--	--	--	--	--	--	--	--	--	--	--	--	--	--	--	--	--	--
163	c166488_g1	85,57820803	8,662049308	3,3045	3,95E-08	5,81E-05	Up-regulated		XP_009129000.1	PREDICTED: putative ribonuclease H protein At1g65750 [Brassica rapa]	--	--	--	--	--	P0C2F6	Putative ribonuclease H protein At1g65750 OS=Arabidopsis thaliana GN=At1g65750 PE=3 SV=1	--	--	--	--	--	--	--	--	--
164	c171308_g10	16,62036755	135,3596642	-3,0258	4,51E-08	6,59E-05	Down-regulated		--	--	--	--	--	--	--	--	--	--	--	--	--	--	--	--	--	--
165	c174865_g3	1,482790181	48,46957271	-5,0307	5,18E-08	7,52E-05	Down-regulated		XP_007224079.1	hypothetical protein PRUPE_ppa015473mg, partial [Prunus persica]>gi|462421015|gb|EMJ25278.1| hypothetical protein PRUPE_ppa015473mg, partial [Prunus persica]	KJ501994.1	Erycina pusilla clone BAC clone 089F15_c2 mitochondrion sequence	--	--	--	--	--	--	--	--	--	--	--	--	--	--
166	c128309_g2	35,56450354	0	-	5,27E-08	7,62E-05	Up-regulated		CDP20930.1	unnamed protein product [Coffea canephora]	--	--	--	--	--	--	--	PF10588	NADH-ubiquinone oxidoreductase-G iron-sulfur binding region	GO:0055114	oxidation-reduction process	GO:0016491	oxidoreductase activity	--	--	--
167	c173587_g1	16,64152473	135,0015294	-3,0201	5,98E-08	8,58E-05	Down-regulated		XP_007046404.1	Uncharacterized protein TCM_011923 [Theobroma cacao]>gi|508710339|gb|EOY02236.1| Uncharacterized protein TCM_011923 [Theobroma cacao]	--	--	--	--	--	O00370	LINE-1 retrotransposable element ORF2 protein OS=Homo sapiens PE=1 SV=1	PF04813	Hepatocyte nuclear factor 1 (HNF-1), alpha isoform C terminus	GO:0045893	positive regulation of transcription, DNA-templated	--	--	GO:0005634	nucleus	--
168	c132029_g1	251,9448454	17,11371327	3,8799	6,03E-08	8,61E-05	Up-regulated		--	--	--	--	--	--	--	--	--	PF05856//PF09329	ARP2/3 complex 20 kDa subunit (ARPC4)//Primase zinc finger	GO:0006260//GO:0034314//GO:0030041	DNA replication//Arp2/3 complex-mediated actin nucleation//actin filament polymerization	--	--	GO:0005885//GO:0015629//GO:0005634	Arp2/3 protein complex//actin cytoskeleton//nucleus	--
169	c106930_g1	0	32,03979347	-	6,27E-08	8,87E-05	Down-regulated		XP_012091485.1	PREDICTED: protein TRANSPORT INHIBITOR RESPONSE 1-like isoform X1 [Jatropha curcas]>gi|643703815|gb|KDP20879.1| hypothetical protein JCGZ_21350 [Jatropha curcas]	--	--	K14485	TIR1	transport inhibitor response 1	Q07078	Heat shock protein 81-3 OS=Oryza sativa subsp. japonica GN=HSP81-3 PE=2 SV=2	PF03121//PF00183	Herpesviridae UL52/UL70 DNA primase//Hsp90 protein	GO:0006950//GO:0006260//GO:0006351//GO:0006269//GO:0006457	response to stress//DNA replication//transcription, DNA-templated//DNA replication, synthesis of RNA primer//protein folding	GO:0005524//GO:0003896//GO:0051082	ATP binding//DNA primase activity//unfolded protein binding	GO:0005657//GO:0005730	replication fork//nucleolus	KOG0019
170	c167897_g9	35,62873501	0	-	6,29E-08	8,87E-05	Up-regulated		--	--	--	--	--	--	--	--	--	--	--	--	--	--	--	--	--	--
171	c172473_g3	0	48,85561816	-	6,47E-08	9,07E-05	Down-regulated		XP_009412834.1	PREDICTED: peroxygenase-like [Musa acuminata subsp. malaccensis]	--	--	K17991	PXG	peroxygenase	Q9SQ57	Peroxygenase OS=Sesamum indicum GN=SOP1 PE=1 SV=1	PF03278	IpaB/EvcA family	GO:0009405	pathogenesis	--	--	--	--	--
172	c168845_g1	238,5898007	41,36881903	2,5279	6,71E-08	9,36E-05	Up-regulated		XP_010941413.1	PREDICTED: transmembrane protein 184 homolog DDB_G0279555-like [Elaeis guineensis]>gi|743855436|ref|XP_010941414.1| PREDICTED: transmembrane protein 184 homolog DDB_G0279555-like [Elaeis guineensis]	--	--	--	--	--	--	--	PF12131//PF02544//PF05297	Protein of unknown function (DUF3586)//3-oxo-5-alpha-steroid 4-dehydrogenase//Herpesvirus latent membrane protein 1 (LMP1)	GO:0006508//GO:0006629//GO:0019087	proteolysis//lipid metabolic process//transformation of host cell by virus	GO:0004197//GO:0016627	cysteine-type endopeptidase activity//oxidoreductase activity, acting on the CH-CH group of donors	GO:0016021//GO:0005737	integral component of membrane//cytoplasm	--
173	c152139_g2	0	33,08490417	-	7,16E-08	9,93E-05	Down-regulated		CBI38033.3	unnamed protein product [Vitis vinifera]	XM_010908857.1	PREDICTED: Elaeis guineensis peptide methionine sulfoxide reductase B5 (LOC105033890), partial mRNA	K07305	msrB	peptide-methionine (R)-S-oxide reductase	Q10L32	Peptide methionine sulfoxide reductase B5 OS=Oryza sativa subsp. japonica GN=MSRB5 PE=2 SV=1	--	--	--	--	--	--	--	--	KOG0856
174	c174672_g2	113,2143361	12,36548267	3,1947	7,38E-08	0,00010172	Up-regulated		--	--	--	--	--	--	--	--	--	PF04111	Autophagy protein Apg6	GO:0006914	autophagy	--	--	--	--	--
175	c115301_g1	120,4220408	11,67955121	3,366	7,72E-08	0,00010572	Up-regulated		--	--	--	--	--	--	--	--	--	--	--	--	--	--	--	--	--	--
176	c1523_g1	34,80274055	0	-	8,12E-08	0,00011062	Up-regulated		XP_008382787.1	PREDICTED: putative ribonuclease H protein At1g65750 [Malus domestica]	--	--	--	--	--	P0C2F6	Putative ribonuclease H protein At1g65750 OS=Arabidopsis thaliana GN=At1g65750 PE=3 SV=1	--	--	--	--	--	--	--	--	--
177	c169005_g2	7,629573882	84,5741983	-3,4705	9,29E-08	0,00012585	Down-regulated		XP_010684120.1	PREDICTED: uncharacterized protein LOC104898717 [Beta vulgaris subsp. vulgaris]	--	--	--	--	--	--	--	--	--	--	--	--	--	--	--	--
178	c98211_g1	1,382376972	47,26788784	-5,0956	9,36E-08	0,00012606	Down-regulated		--	--	--	--	--	--	--	--	--	--	--	--	--	--	--	--	--	--
179	c172355_g1	38,51745037	409,2840605	-3,4095	1,05E-07	0,00014119	Down-regulated		XP_008801094.1	PREDICTED: transforming growth factor-beta receptor-associated protein 1 [Phoenix dactylifera]	--	--	--	--	--	--	--	--	--	--	--	--	--	--	--	--
180	c173063_g7	34,22001536	0	-	1,09E-07	0,00014498	Up-regulated		--	--	--	--	--	--	--	--	--	PF04088	Peroxin 13, N-terminal region	GO:0016560	protein import into peroxisome matrix, docking	--	--	GO:0016021//GO:0005777	integral component of membrane//peroxisome	--
181	c165462_g2	33,96356886	0	-	1,28E-07	0,00016975	Up-regulated		--	--	--	--	--	--	--	--	--	--	--	--	--	--	--	--	--	--
182	c152858_g1	33,54314986	0	-	1,29E-07	0,00017031	Up-regulated		--	--	--	--	--	--	--	--	--	--	--	--	--	--	--	--	--	--
183	c160210_g1	207,3916994	31,83003505	2,7039	1,55E-07	0,00020309	Up-regulated		XP_010918954.1	PREDICTED: tyrosine decarboxylase 1-like [Elaeis guineensis]	XM_008812594.1	PREDICTED: Phoenix dactylifera tyrosine decarboxylase 1-like (LOC103722148), mRNA	K01592	E4.1.1.25	tyrosine decarboxylase	Q7XHL3	Tyrosine decarboxylase 1 OS=Oryza sativa subsp. japonica GN=Os07g0437500 PE=2 SV=1	PF00155//PF01212//PF00282//PF05889	Aminotransferase class I and II//Beta-eliminating lyase//Pyridoxal-dependent decarboxylase conserved domain//O-phosphoseryl-tRNA(Sec) selenium transferase, SepSecS	GO:0006520//GO:0009058//GO:0019752	cellular amino acid metabolic process//biosynthetic process//carboxylic acid metabolic process	GO:0016829//GO:0016740//GO:0016831//GO:0030170	lyase activity//transferase activity//carboxy-lyase activity//pyridoxal phosphate binding	--	--	KOG0629
184	c170945_g2	0	31,1009332	-	1,82E-07	0,00023656	Down-regulated		--	--	--	--	--	--	--	--	--	--	--	--	--	--	--	--	--	--
185	c172494_g4	37,5130903	0,287471296	7,0278	1,83E-07	0,00023656	Up-regulated		--	--	--	--	--	--	--	--	--	--	--	--	--	--	--	--	--	--
186	c173748_g5	209,1312574	37,48563932	2,48	1,90E-07	0,00024523	Up-regulated		XP_008791836.1	PREDICTED: probable E3 ubiquitin-protein ligase ARI8, partial [Phoenix dactylifera]	AK376933.1	Hordeum vulgare subsp. vulgare mRNA for predicted protein, complete cds, clone: NIASHv3144G15	K11968	ARIH1	ariadne-1	Q84RR0	Probable E3 ubiquitin-protein ligase ARI7 OS=Arabidopsis thaliana GN=ARI7 PE=2 SV=1	--	--	--	--	--	--	--	--	--
187	c152976_g3	32,95920879	0	-	1,92E-07	0,00024578	Up-regulated		--	--	--	--	--	--	--	--	--	--	--	--	--	--	--	--	--	--
188	c178689_g1	11,71503981	2610,027901	-7,7996	2,06E-07	0,00026277	Down-regulated		XP_010920893.1	PREDICTED: chalcone synthase 3-like [Elaeis guineensis]	--	--	K00660	CHS	chalcone synthase	Q01287	Chalcone synthase 2 OS=Pisum sativum GN=CHS2 PE=2 SV=1	--	--	--	--	--	--	--	--	--
189	c172903_g4	190,5802506	29,73783028	2,68	2,07E-07	0,00026282	Up-regulated		XP_010680400.1	PREDICTED: transposon Tf2-1 polyprotein isoform X1 [Beta vulgaris subsp. vulgaris]	LN713259.1	Cucumis melo genomic chromosome, chr_5	--	--	--	Q7LHG5	Transposon Ty3-I Gag-Pol polyprotein OS=Saccharomyces cerevisiae (strain ATCC 204508 / S288c) GN=TY3B-I PE=3 SV=2	--	--	--	--	--	--	--	--	KOG0017
190	c36837_g1	37,38673786	0,287471296	7,023	2,27E-07	0,00028674	Up-regulated		--	--	--	--	--	--	--	--	--	--	--	--	--	--	--	--	--	--
191	c175391_g5	0	28,88266113	-	2,47E-07	0,00030978	Down-regulated		--	--	--	--	--	--	--	--	--	--	--	--	--	--	--	--	--	--
192	c177856_g1	77,22683526	0	-	2,64E-07	0,00032936	Up-regulated		--	--	--	--	--	--	--	--	--	--	--	--	--	--	--	--	--	--
193	c150810_g2	31,94244317	0	-	2,75E-07	0,00034025	Up-regulated		--	--	--	--	--	--	--	--	--	--	--	--	--	--	--	--	--	--
194	c172635_g3	0	29,04398781	-	2,76E-07	0,00034025	Down-regulated		--	--	--	--	--	--	--	--	--	PF02817	e3 binding domain	GO:0008152	metabolic process	GO:0016746	transferase activity, transferring acyl groups	--	--	--
195	c159326_g1	40,09912216	0,962449923	5,3807	2,83E-07	0,00034779	Up-regulated		--	--	--	--	--	--	--	--	--	--	--	--	--	--	--	--	--	--
196	c174612_g1	276,3157665	49,62304792	2,4772	2,86E-07	0,00034905	Up-regulated		XP_010921564.1	PREDICTED: putative disease resistance protein RGA1 [Elaeis guineensis]	--	--	--	--	--	Q7XA42	Putative disease resistance protein RGA1 OS=Solanum bulbocastanum GN=RGA1 PE=2 SV=2	PF02180//PF00931//PF04043//PF00448//PF13855//PF00560	Bcl-2 homology region 4//NB-ARC domain//Plant invertase/pectin methylesterase inhibitor//SRP54-type protein, GTPase domain//Leucine rich repeat//Leucine Rich Repeat	GO:0006614//GO:0042981	SRP-dependent cotranslational protein targeting to membrane//regulation of apoptotic process	GO:0005525//GO:0043531//GO:0005515//GO:0004857	GTP binding//ADP binding//protein binding//enzyme inhibitor activity	--	--	--
197	c137340_g1	31,98119139	0	-	3,01E-07	0,0003656	Up-regulated		--	--	--	--	--	--	--	--	--	PF02060	Slow voltage-gated potassium channel	GO:0006811//GO:0006813	ion transport//potassium ion transport	GO:0005249	voltage-gated potassium channel activity	GO:0008076//GO:0016020	voltage-gated potassium channel complex//membrane	--
198	c174690_g2	174,7939569	27,16678877	2,6857	3,30E-07	0,00039889	Up-regulated		--	--	--	--	--	--	--	--	--	--	--	--	--	--	--	--	--	--
199	c144218_g2	62,99781134	5,137735363	3,6161	3,72E-07	0,00044819	Up-regulated		--	--	--	--	--	--	--	--	--	--	--	--	--	--	--	--	--	--
200	c92566_g1	31,13254889	0	-	3,74E-07	0,00044819	Up-regulated		--	--	--	--	--	--	--	--	--	--	--	--	--	--	--	--	--	--
201	c170050_g2	58,0226984	3,001393126	4,2729	3,86E-07	0,00046031	Up-regulated		EMT27390.1	Serine hydroxymethyltransferase 1 [Aegilops tauschii]	--	--	--	--	--	O23254	Serine hydroxymethyltransferase 4 OS=Arabidopsis thaliana GN=SHM4 PE=1 SV=1	PF01004//PF00464	Flavivirus envelope glycoprotein M//Serine hydroxymethyltransferase	GO:0019058	viral life cycle	GO:0016740	transferase activity	GO:0019031	viral envelope	--
202	c168195_g1	31,74409551	0	-	4,08E-07	0,00048412	Up-regulated		XP_007037177.1	DNA/RNA polymerases superfamily protein [Theobroma cacao]>gi|508774422|gb|EOY21678.1| DNA/RNA polymerases superfamily protein [Theobroma cacao]	--	--	--	--	--	P0CT39	Transposon Tf2-6 polyprotein OS=Schizosaccharomyces pombe (strain 972 / ATCC 24843) GN=Tf2-6 PE=3 SV=1	PF00665//PF13683	Integrase core domain//Integrase core domain	GO:0015074	DNA integration	--	--	--	--	KOG0017
203	c161528_g2	40,47046271	224,5265507	-2,4719	4,15E-07	0,00048881	Down-regulated		XP_010916896.1	PREDICTED: UDP-glycosyltransferase 88A1-like [Elaeis guineensis]	XM_009404632.1	PREDICTED: Musa acuminata subsp. malaccensis anthocyanidin 5,3-O-glucosyltransferase-like (LOC103986598), mRNA	--	--	--	Q4R1I9	Anthocyanidin 5,3-O-glucosyltransferase OS=Rosa hybrid cultivar GN=RhGT1 PE=2 SV=1	PF00201	UDP-glucoronosyl and UDP-glucosyl transferase	GO:0008152	metabolic process	GO:0016758	transferase activity, transferring hexosyl groups	--	--	--
204	c173124_g2	1490,603284	406,8201718	1,8734	4,16E-07	0,00048881	Up-regulated		XP_008792721.1	PREDICTED: UDP-glycosyltransferase 83A1-like [Phoenix dactylifera]	XM_009390119.1	PREDICTED: Musa acuminata subsp. malaccensis UDP-glycosyltransferase 83A1-like (LOC103975215), mRNA	--	--	--	Q9SGA8	UDP-glycosyltransferase 83A1 OS=Arabidopsis thaliana GN=UGT83A1 PE=2 SV=1	PF00201	UDP-glucoronosyl and UDP-glucosyl transferase	GO:0008152	metabolic process	GO:0016758	transferase activity, transferring hexosyl groups	--	--	KOG1192
205	c247288_g1	30,56936155	0	-	4,34E-07	0,00050694	Up-regulated		CDP14239.1	unnamed protein product [Coffea canephora]	--	--	--	--	--	--	--	--	--	--	--	--	--	--	--	--
206	c169188_g1	54,88953863	3,314555524	4,0496	4,44E-07	0,00051328	Up-regulated		XP_007199084.1	hypothetical protein PRUPE_ppa019160mg, partial [Prunus persica]>gi|462394484|gb|EMJ00283.1| hypothetical protein PRUPE_ppa019160mg, partial [Prunus persica]	--	--	--	--	--	Q9SZL8	Protein FAR1-RELATED SEQUENCE 5 OS=Arabidopsis thaliana GN=FRS5 PE=2 SV=1	PF00872//PF04434	Transposase, Mutator family//SWIM zinc finger	GO:0006313	transposition, DNA-mediated	GO:0004803//GO:0003677//GO:0008270	transposase activity//DNA binding//zinc ion binding	--	--	--
207	c172234_g2	125,884073	15,83714792	2,9907	4,42E-07	0,00051328	Up-regulated		--	--	--	--	--	--	--	--	--	--	--	--	--	--	--	--	--	--
208	c162006_g2	240,6848919	45,91486347	2,3901	5,00E-07	0,00057414	Up-regulated		XP_010910116.1	PREDICTED: LOW QUALITY PROTEIN: MATE efflux family protein 5-like [Elaeis guineensis]	XM_006280314.1	Capsella rubella hypothetical protein (CARUB_v10026303mg) mRNA, complete cds	K03327	TC.MATE, SLC47A, norM, mdtK, dinF	multidrug resistance protein, MATE family	Q9SIA3	MATE efflux family protein 6 OS=Arabidopsis thaliana GN=DTXL2 PE=3 SV=2	PF04369//PF01554	Lactococcin-like family//MatE	GO:0015893//GO:0006855//GO:0042742//GO:0006810//GO:0055085	drug transport//drug transmembrane transport//defense response to bacterium//transport//transmembrane transport	GO:0015297//GO:0015238	antiporter activity//drug transmembrane transporter activity	GO:0005576//GO:0016020	extracellular region//membrane	KOG1347
209	c171917_g2	84,62667356	381,312193	-2,1718	5,01E-07	0,00057414	Down-regulated		--	--	--	--	--	--	--	--	--	PF12513//PF06418	Mitochondrial degradasome RNA helicase subunit C terminal//CTP synthase N-terminus	GO:0006206//GO:0006221	pyrimidine nucleobase metabolic process//pyrimidine nucleotide biosynthetic process	GO:0016817//GO:0003883	hydrolase activity, acting on acid anhydrides//CTP synthase activity	--	--	--
210	c170590_g6	30,32685219	0	-	5,10E-07	0,00058174	Up-regulated		ACB28472.1	polyprotein [Ananas comosus]	--	--	--	--	--	Q7LHG5	Transposon Ty3-I Gag-Pol polyprotein OS=Saccharomyces cerevisiae (strain ATCC 204508 / S288c) GN=TY3B-I PE=3 SV=2	--	--	--	--	--	--	--	--	KOG0017
211	c160517_g3	30,35653304	0	-	5,59E-07	0,00063458	Up-regulated		--	--	--	--	--	--	--	--	--	--	--	--	--	--	--	--	--	--
212	c171642_g1	13,70012402	102,8959148	-2,9089	5,87E-07	0,00066288	Down-regulated		--	--	--	--	--	--	--	--	--	--	--	--	--	--	--	--	--	--
213	c29755_g1	29,67240675	0	-	7,39E-07	0,00083138	Up-regulated		XP_003594634.1	hypothetical protein MTR_2g032720 [Medicago truncatula]>gi|355483682|gb|AES64885.1| hypothetical protein MTR_2g032720 [Medicago truncatula]	--	--	--	--	--	--	--	--	--	--	--	--	--	--	--	--
214	c132060_g1	0	26,53445903	-	8,17E-07	0,00091447	Down-regulated		--	--	--	--	--	--	--	--	--	--	--	--	--	--	--	--	--	--
215	c171286_g1	6,607710509	70,16798443	-3,4086	8,25E-07	0,0009187	Down-regulated		--	--	--	--	--	--	--	--	--	--	--	--	--	--	--	--	--	--
216	c265729_g1	349,1474368	42,08085908	3,0526	8,38E-07	0,00092934	Up-regulated		XP_010942733.1	PREDICTED: isoflavone reductase-like protein isoform X1 [Elaeis guineensis]	--	--	--	--	--	E1U332	Isoflavone reductase-like protein OS=Olea europaea PE=1 SV=1	PF01370//PF01297//PF03435//PF03427//PF08503//PF01073//PF01118	NAD dependent epimerase/dehydratase family//Zinc-uptake complex component A periplasmic//Saccharopine dehydrogenase NADP binding domain//Carbohydrate binding domain (family 19)//Tetrahydrodipicolinate succinyltransferase N-terminal//3-beta hydroxysteroid dehydrogenase/isomerase family//Semialdehyde dehydrogenase, NAD binding domain	GO:0055114//GO:0008209//GO:0008210//GO:0008207//GO:0006531//GO:0006032//GO:0006694//GO:0030001//GO:0042967//GO:0006522	oxidation-reduction process//androgen metabolic process//estrogen metabolic process//C21-steroid hormone metabolic process//aspartate metabolic process//chitin catabolic process//steroid biosynthetic process//metal ion transport//acyl-carrier-protein biosynthetic process//alanine metabolic process	GO:0008061//GO:0003824//GO:0003854//GO:0051287//GO:0050662//GO:0016620//GO:0046872//GO:0047200//GO:0016616//GO:0016491	chitin binding//catalytic activity//3-beta-hydroxy-delta5-steroid dehydrogenase activity//NAD binding//coenzyme binding//oxidoreductase activity, acting on the aldehyde or oxo group of donors, NAD or NADP as acceptor//metal ion binding//tetrahydrodipicolinate N-acetyltransferase activity//oxidoreductase activity, acting on the CH-OH group of donors, NAD or NADP as acceptor//oxidoreductase activity	--	--	--
217	c174668_g3	44,49394793	597,9392816	-3,7483	9,05E-07	0,00099879	Down-regulated		CAN66710.1	hypothetical protein VITISV_006397 [Vitis vinifera]	--	--	--	--	--	P04146	Copia protein OS=Drosophila melanogaster GN=GIP PE=1 SV=3	PF00665//PF00098//PF13683	Integrase core domain//Zinc knuckle//Integrase core domain	GO:0015074	DNA integration	GO:0008270//GO:0003676	zinc ion binding//nucleic acid binding	--	--	--
218	c173915_g8	0,319058642	90,20072947	-8,1432	9,16E-07	0,0010065	Down-regulated		--	--	--	--	--	--	--	--	--	--	--	--	--	--	--	--	--	--
219	c98947_g1	0	26,34870774	-	9,25E-07	0,0010111	Down-regulated		--	--	--	--	--	--	--	--	--	--	--	--	--	--	--	--	--	--
220	c155507_g3	0	26,5141333	-	9,57E-07	0,0010373	Down-regulated		--	--	--	--	--	--	--	--	--	--	--	--	--	--	--	--	--	--
221	c177633_g1	0	26,84425348	-	9,53E-07	0,0010373	Down-regulated		--	--	--	--	--	--	--	--	--	--	--	--	--	--	--	--	--	--
222	c98450_g1	186,2418166	35,20883168	2,4032	9,70E-07	0,001046	Up-regulated		--	--	--	--	--	--	--	--	--	PF02411//PF04186	MerT mercuric transport protein//FxsA cytoplasmic membrane protein	GO:0015694	mercury ion transport	GO:0015097	mercury ion transmembrane transporter activity	GO:0016020	membrane	--
223	c2340_g1	429,1939684	98,81688002	2,1188	9,90E-07	0,0010634	Up-regulated		XP_010912721.1	PREDICTED: 22.7 kDa class IV heat shock protein-like [Elaeis guineensis]	--	--	K13993	HSP20	HSP20 family protein	P19244	22.7 kDa class IV heat shock protein OS=Pisum sativum GN=HSP22.7 PE=2 SV=1	--	--	--	--	--	--	--	--	KOG0710
224	c25261_g1	62,33213549	6,737149462	3,2098	1,06E-06	0,0011335	Up-regulated		--	--	--	--	--	--	--	--	--	--	--	--	--	--	--	--	--	--
225	c121371_g2	47,39429714	2,693596104	4,1371	1,07E-06	0,0011389	Up-regulated		XP_010922886.1	PREDICTED: uncharacterized protein LOC105046088 isoform X1 [Elaeis guineensis]	--	--	--	--	--	--	--	--	--	--	--	--	--	--	--	--
226	c172428_g1	5903,488369	21203,09045	-1,8446	1,17E-06	0,001235	Down-regulated		XP_008787429.1	PREDICTED: BAHD acyltransferase DCR [Phoenix dactylifera]	XM_008789207.1	PREDICTED: Phoenix dactylifera BAHD acyltransferase DCR (LOC103705482), mRNA	--	--	--	Q9FF86	BAHD acyltransferase DCR OS=Arabidopsis thaliana GN=DCR PE=2 SV=1	PF02458	Transferase family	--	--	GO:0016747	transferase activity, transferring acyl groups other than amino-acyl groups	--	--	--
227	c170139_g1	340,3147808	58,76483503	2,5338	1,20E-06	0,0012672	Up-regulated		XP_010559036.1	PREDICTED: LOW QUALITY PROTEIN: F-box/FBD/LRR-repeat protein At1g16930-like [Tarenaya hassleriana]	AC235148.1	Glycine max strain Williams 82 clone GM_WBa0082C08, complete sequence	--	--	--	P10978	Retrovirus-related Pol polyprotein from transposon TNT 1-94 OS=Nicotiana tabacum PE=2 SV=1	--	--	--	--	--	--	--	--	--
228	c135596_g1	116,7322298	17,80933109	2,7125	1,21E-06	0,0012685	Up-regulated		XP_008782814.1	PREDICTED: uncharacterized protein LOC103702257 isoform X2 [Phoenix dactylifera]	--	--	--	--	--	--	--	PF04277	Oxaloacetate decarboxylase, gamma chain	GO:0006525//GO:0071436//GO:0006560//GO:0006814//GO:0006090	arginine metabolic process//sodium ion export//proline metabolic process//sodium ion transport//pyruvate metabolic process	GO:0008948//GO:0015081	oxaloacetate decarboxylase activity//sodium ion transmembrane transporter activity	GO:0016020	membrane	--
229	c173325_g4	56,69531007	5,099720911	3,4747	1,21E-06	0,0012689	Up-regulated		--	--	--	--	--	--	--	--	--	--	--	--	--	--	--	--	--	--
230	c250804_g1	28,07345965	0	-	1,31E-06	0,0013686	Up-regulated		--	--	--	--	--	--	--	--	--	PF00220//PF07155//PF08131	Neurohypophysial hormones, N-terminal Domain//ECF-type riboflavin transporter, S component//Defensin-like peptide family	GO:0007218	neuropeptide signaling pathway	GO:0005185	neurohypophyseal hormone activity	GO:0005576//GO:0016020	extracellular region//membrane	--
231	c167700_g2	770,9571704	2757,92889	-1,8389	1,36E-06	0,0014078	Down-regulated		XP_009381769.1	PREDICTED: bidirectional sugar transporter SWEET4-like [Musa acuminata subsp. malaccensis]	GQ495905.1	Gladiolus grandiflorus clone GH13-13A senescence-associated protein 29 mRNA, partial cds	K15382	SLC50A, SWEET	solute carrier family 50 (sugar transporter)	Q6K4V2	Bidirectional sugar transporter SWEET4 OS=Oryza sativa subsp. japonica GN=SWEET4 PE=2 SV=1	PF03083	Sugar efflux transporter for intercellular exchange	--	--	--	--	GO:0016021	integral component of membrane	--
232	c164225_g1	0,531659165	32,32484986	-5,926	1,37E-06	0,0014152	Down-regulated		--	--	--	--	--	--	--	--	--	--	--	--	--	--	--	--	--	--
233	c164578_g1	8,78486949	77,12521823	-3,1341	1,48E-06	0,0015229	Down-regulated		--	--	--	--	--	--	--	--	--	PF07651	ANTH domain	--	--	GO:0005543	phospholipid binding	--	--	--
234	c169233_g4	76,31599584	6,324368507	3,593	1,50E-06	0,001535	Up-regulated		--	--	--	--	--	--	--	--	--	--	--	--	--	--	--	--	--	--
235	c157539_g3	138,3659854	542,2908221	-1,9706	1,51E-06	0,0015407	Down-regulated		XP_009383001.1	PREDICTED: sugar transport protein 8-like [Musa acuminata subsp. malaccensis]	XM_009390582.1	PREDICTED: Musa acuminata subsp. malaccensis sugar carrier protein C-like (LOC103975575), mRNA	--	--	--	Q9SBA7	Sugar transport protein 8 OS=Arabidopsis thaliana GN=STP8 PE=2 SV=2	PF00083//PF06085//PF07690	Sugar (and other) transporter//Lipoprotein Rz1 precursor//Major Facilitator Superfamily	GO:0019064//GO:0055085	fusion of virus membrane with host plasma membrane//transmembrane transport	GO:0022857	transmembrane transporter activity	GO:0019867//GO:0016021	outer membrane//integral component of membrane	KOG0254
236	c139564_g1	124,7886241	9,408422405	3,7294	1,52E-06	0,0015444	Up-regulated		NP_001132476.2	uncharacterized protein LOC100193934 [Zea mays]>gi|194702012|gb|ACF85090.1| unknown [Zea mays]>gi|414587394|tpg|DAA37965.1| TPA: hypothetical protein ZEAMMB73_618383 [Zea mays]	AK371719.1	Hordeum vulgare subsp. vulgare mRNA for predicted protein, complete cds, clone: NIASHv2140H02	K05359	ADT, PDT	arogenate/prephenate dehydratase	Q9ZUY3	Arogenate dehydratase 3, chloroplastic OS=Arabidopsis thaliana GN=ADT3 PE=1 SV=1	--	--	GO:0006571//GO:0000162//GO:0009094	tyrosine biosynthetic process//tryptophan biosynthetic process//L-phenylalanine biosynthetic process	GO:0004664	prephenate dehydratase activity	--	--	--
237	c158728_g1	2257,673321	7648,683986	-1,7604	1,54E-06	0,0015575	Down-regulated		XP_010912040.1	PREDICTED: uncharacterized protein LOC105038049 isoform X1 [Elaeis guineensis]	XM_008787650.1	PREDICTED: Phoenix dactylifera uncharacterized LOC103704387 (LOC103704387), transcript variant X1, mRNA	--	--	--	--	--	PF02212	Dynamin GTPase effector domain	--	--	GO:0005525//GO:0003924	GTP binding//GTPase activity	--	--	--
238	c132429_g1	53,17032474	0,962449923	5,7878	1,66E-06	0,0016607	Up-regulated		--	--	--	--	--	--	--	--	--	--	--	--	--	--	--	--	--	--
239	c173861_g1	0	39,62989256	-	1,67E-06	0,0016607	Down-regulated		--	--	--	--	--	--	--	--	--	--	--	--	--	--	--	--	--	--
240	c99604_g1	2,75902475	46,86732622	-4,0864	1,66E-06	0,0016607	Down-regulated		--	--	XM_009406882.1	PREDICTED: Musa acuminata subsp. malaccensis putative pectinesterase/pectinesterase inhibitor 45 (LOC103988338), mRNA	--	--	--	--	--	--	--	--	--	--	--	--	--	--
241	c144596_g1	51,51571681	239,2682501	-2,2155	1,72E-06	0,001707	Down-regulated		XP_010913934.1	PREDICTED: uncharacterized protein LOC105039473 [Elaeis guineensis]	XM_010655520.1	PREDICTED: Vitis vinifera uncharacterized LOC104880112 (LOC104880112), transcript variant X1, mRNA	--	--	--	Q2IG29	UDP-N-acetylmuramoylalanine--D-glutamate ligase OS=Anaeromyxobacter dehalogenans (strain 2CP-C) GN=murD PE=3 SV=1	PF08245//PF02737//PF02826	Mur ligase middle domain//3-hydroxyacyl-CoA dehydrogenase, NAD binding domain//D-isomer specific 2-hydroxyacid dehydrogenase, NAD binding domain	GO:0006554//GO:0006631//GO:0009058//GO:0018874//GO:0006633//GO:0006552//GO:0006550//GO:0055114//GO:0006568//GO:0006574	lysine catabolic process//fatty acid metabolic process//biosynthetic process//benzoate metabolic process//fatty acid biosynthetic process//leucine catabolic process//isoleucine catabolic process//oxidation-reduction process//tryptophan metabolic process//valine catabolic process	GO:0016491//GO:0005524//GO:0003857//GO:0051287	oxidoreductase activity//ATP binding//3-hydroxyacyl-CoA dehydrogenase activity//NAD binding	--	--	--
242	c165094_g7	0	46,98050792	-	1,91E-06	0,0018862	Down-regulated		--	--	--	--	--	--	--	--	--	--	--	--	--	--	--	--	--	--
243	c173928_g5	70,33570414	5,620644296	3,6454	1,98E-06	0,001951	Up-regulated		XP_012829392.1	PREDICTED: uncharacterized protein LOC105950572 [Erythranthe guttatus]	--	--	--	--	--	--	--	--	--	--	--	--	--	--	--	--
244	c174450_g8	39,14356557	0	-	2,00E-06	0,0019585	Up-regulated		XP_010935421.1	PREDICTED: uncharacterized protein LOC105055356 [Elaeis guineensis]	--	--	--	--	--	--	--	--	--	--	--	--	--	--	--	--
245	c116100_g1	0	24,48192598	-	2,04E-06	0,0019897	Down-regulated		--	--	--	--	--	--	--	--	--	--	--	--	--	--	--	--	--	--
246	c134645_g1	707,04493	182,3790215	1,9549	2,08E-06	0,0020203	Up-regulated		XP_008794050.1	PREDICTED: uncharacterized protein LOC103710183 [Phoenix dactylifera]>gi|672110200|ref|XP_008794058.1| PREDICTED: uncharacterized protein LOC103710183 [Phoenix dactylifera]	XM_008795836.1	PREDICTED: Phoenix dactylifera uncharacterized LOC103710183 (LOC103710183), transcript variant X2, mRNA	--	--	--	--	--	PF05479	Photosystem I reaction centre subunit N (PSAN or PSI-N)	GO:0015979	photosynthesis	GO:0005516	calmodulin binding	GO:0009522//GO:0042651	photosystem I//thylakoid membrane	--
247	c175289_g6	27,28147211	0	-	2,09E-06	0,0020278	Up-regulated		--	--	--	--	--	--	--	--	--	--	--	--	--	--	--	--	--	--
248	c153901_g2	0,797488747	34,19477747	-5,4222	2,21E-06	0,0021334	Down-regulated		--	--	--	--	--	--	--	--	--	PF11380//PF00502	Stealth protein CR2, conserved region 2//Phycobilisome protein	GO:0015979	photosynthesis	GO:0016772	transferase activity, transferring phosphorus-containing groups	GO:0030089	phycobilisome	--
249	c172727_g3	44,45280869	2,250385594	4,304	2,41E-06	0,0023164	Up-regulated		--	--	--	--	--	--	--	--	--	--	--	--	--	--	--	--	--	--
250	c155538_g1	81,50799463	345,4452364	-2,0834	2,44E-06	0,0023386	Down-regulated		XP_007017131.1	Uncharacterized protein TCM_033752 [Theobroma cacao]>gi|508722459|gb|EOY14356.1| Uncharacterized protein TCM_033752 [Theobroma cacao]	--	--	--	--	--	P14381	Transposon TX1 uncharacterized 149 kDa protein OS=Xenopus laevis PE=3 SV=1	PF01325	Iron dependent repressor, N-terminal DNA binding domain	--	--	GO:0003677	DNA binding	--	--	--
251	c170948_g1	58,04042968	4,105261479	3,8215	2,61E-06	0,0024849	Up-regulated		XP_009591764.1	PREDICTED: uncharacterized protein LOC104088736 isoform X2 [Nicotiana tomentosiformis]	--	--	--	--	--	--	--	PF14829//PF09177	Glycerol-3-phosphate acyltransferase N-terminal//Syntaxin 6, N-terminal	GO:0042967//GO:0046486//GO:0048193	acyl-carrier-protein biosynthetic process//glycerolipid metabolic process//Golgi vesicle transport	GO:0004366	glycerol-3-phosphate O-acyltransferase activity	GO:0016020	membrane	--
252	c124481_g1	0	23,83190752	-	2,82E-06	0,0026537	Down-regulated		--	--	--	--	--	--	--	--	--	--	--	--	--	--	--	--	--	--
253	c165820_g2	7,922605563	70,39890354	-3,1515	2,81E-06	0,0026537	Down-regulated		--	--	--	--	--	--	--	--	--	--	--	--	--	--	--	--	--	--
254	c172023_g4	26,57803594	0	-	2,80E-06	0,0026537	Up-regulated		XP_010930696.1	PREDICTED: LOW QUALITY PROTEIN: DNA topoisomerase 2-binding protein 1-A [Elaeis guineensis]	--	--	K10728	TOPBP1	topoisomerase (DNA) II binding protein 1	--	--	--	--	--	--	--	--	--	--	--
255	c166549_g2	26,52900448	0	-	2,84E-06	0,0026643	Up-regulated		--	--	--	--	--	--	--	--	--	--	--	--	--	--	--	--	--	--
256	c174729_g5	30,02019909	0,287471296	6,7064	3,72E-06	0,003476	Up-regulated		--	--	--	--	--	--	--	--	--	--	--	--	--	--	--	--	--	--
257	c170536_g3	3,872549684	51,20003484	-3,7248	3,82E-06	0,0035552	Down-regulated		--	--	--	--	--	--	--	--	--	--	--	--	--	--	--	--	--	--
258	c120596_g1	25,9353646	0	-	3,89E-06	0,0036084	Up-regulated		--	--	--	--	--	--	--	--	--	--	--	--	--	--	--	--	--	--
259	c162301_g1	4,773474096	54,61431294	-3,5162	3,94E-06	0,0036409	Down-regulated		--	--	--	--	--	--	--	--	--	PF16251	Nucleic acid-binding domain (NAR)	--	--	GO:0003676	nucleic acid binding	--	--	--
260	c131603_g1	0	44,4084487	-	4,07E-06	0,0037355	Down-regulated		--	--	--	--	--	--	--	--	--	--	--	--	--	--	--	--	--	--
261	c173266_g1	2,649544175	43,94269294	-4,0518	4,07E-06	0,0037355	Down-regulated		XP_012829606.1	PREDICTED: uncharacterized protein LOC105950786 [Erythranthe guttatus]	--	--	--	--	--	--	--	PF03589	Antitermination protein	GO:0006355	regulation of transcription, DNA-templated	GO:0003677	DNA binding	--	--	--
262	c247629_g1	38,47910561	1,149885183	5,0645	4,55E-06	0,0041511	Up-regulated		--	--	--	--	--	--	--	--	--	--	--	--	--	--	--	--	--	--
263	c170886_g2	0	22,66433361	-	4,84E-06	0,0044035	Down-regulated		--	--	--	--	--	--	--	--	--	--	--	--	--	--	--	--	--	--
264	c172003_g5	32,33254989	0,962449923	5,0701	4,88E-06	0,0044186	Up-regulated		--	--	--	--	--	--	--	--	--	--	--	--	--	--	--	--	--	--
265	c173234_g4	0	22,83944552	-	4,99E-06	0,0045035	Down-regulated		--	--	--	--	--	--	--	--	--	--	--	--	--	--	--	--	--	--
266	c171064_g1	1476,884168	442,341667	1,7393	5,03E-06	0,0045247	Up-regulated		XP_010648083.1	PREDICTED: uncharacterized protein LOC104878882 [Vitis vinifera]	--	--	--	--	--	--	--	--	--	--	--	--	--	--	--	--
267	c157887_g4	76,57446512	3,771773354	4,3435	5,13E-06	0,0046008	Up-regulated		--	--	--	--	--	--	--	--	--	PF07578	Lipid A Biosynthesis N-terminal domain	GO:0009245	lipid A biosynthetic process	GO:0008915	lipid-A-disaccharide synthase activity	--	--	--
268	c175097_g2	123,6187192	21,96302431	2,4927	5,17E-06	0,004618	Up-regulated		--	--	--	--	--	--	--	--	--	--	--	--	--	--	--	--	--	--
269	c244994_g1	25,27338339	0	-	5,44E-06	0,0048415	Up-regulated		--	--	--	--	--	--	--	--	--	--	--	--	--	--	--	--	--	--
270	c143698_g1	9,528813458	75,49747603	-2,9861	5,53E-06	0,004904	Down-regulated		--	--	--	--	--	--	--	--	--	--	--	--	--	--	--	--	--	--
271	c173555_g3	70,79221715	7,71865862	3,1972	5,94E-06	0,0052477	Up-regulated		CBI37296.3	unnamed protein product [Vitis vinifera]	AM476928.2	Vitis vinifera contig VV78X023854.2, whole genome shotgun sequence	--	--	--	P10978	Retrovirus-related Pol polyprotein from transposon TNT 1-94 OS=Nicotiana tabacum PE=2 SV=1	PF00665//PF13683//PF00098	Integrase core domain//Integrase core domain//Zinc knuckle	GO:0015074	DNA integration	GO:0003676//GO:0008270	nucleic acid binding//zinc ion binding	--	--	KOG0017
272	c169571_g3	1157,905994	330,4296542	1,8091	6,20E-06	0,0054548	Up-regulated		--	--	--	--	--	--	--	--	--	PF04277	Oxaloacetate decarboxylase, gamma chain	GO:0006090//GO:0006814//GO:0006560//GO:0071436//GO:0006525	pyruvate metabolic process//sodium ion transport//proline metabolic process//sodium ion export//arginine metabolic process	GO:0015081//GO:0008948	sodium ion transmembrane transporter activity//oxaloacetate decarboxylase activity	GO:0016020	membrane	--
273	c167052_g2	56,57865643	6,247922123	3,1788	6,24E-06	0,005467	Up-regulated		--	--	--	--	--	--	--	--	--	--	--	--	--	--	--	--	--	--
274	c146598_g2	38,97828945	1,529390137	4,6716	6,53E-06	0,0056984	Up-regulated		--	--	--	--	--	--	--	--	--	--	--	--	--	--	--	--	--	--
275	c175378_g2	3541,103573	10998,71888	-1,6351	6,55E-06	0,0056984	Down-regulated		XP_010911437.1	PREDICTED: cytochrome P450 86B1-like [Elaeis guineensis]	XM_010913135.1	PREDICTED: Elaeis guineensis cytochrome P450 86B1-like (LOC105037478), mRNA	--	--	--	Q9FVS9	Alkane hydroxylase MAH1 OS=Arabidopsis thaliana GN=CYP96A15 PE=2 SV=1	PF00067	Cytochrome P450	GO:0055114	oxidation-reduction process	GO:0005506//GO:0020037//GO:0016705	iron ion binding//heme binding//oxidoreductase activity, acting on paired donors, with incorporation or reduction of molecular oxygen	--	--	KOG0157
276	c79674_g1	426,174761	86,96609511	2,2929	6,63E-06	0,0057502	Up-regulated		ABK21293.1	unknown [Picea sitchensis]>gi|116783254|gb|ABK22857.1| unknown [Picea sitchensis]>gi|116793623|gb|ABK26815.1| unknown [Picea sitchensis]>gi|224286728|gb|ACN41067.1| unknown [Picea sitchensis]	XM_010927837.1	PREDICTED: Elaeis guineensis 14-3-3-like protein (LOC105048516), mRNA	K06630	YWHAE	14-3-3 protein epsilon	Q6EUP4	14-3-3-like protein GF14-E OS=Oryza sativa subsp. japonica GN=GF14E PE=2 SV=1	--	--	--	--	GO:0019904	protein domain specific binding	--	--	KOG0841
277	c158804_g1	93,07993862	5,002321876	4,2178	6,87E-06	0,0058966	Up-regulated		--	--	--	--	--	--	--	--	--	PF08107	Pleurocidin family	GO:0042742	defense response to bacterium	--	--	--	--	--
278	c168324_g1	98,01698177	17,17604832	2,5126	6,87E-06	0,0058966	Up-regulated		--	--	--	--	--	--	--	--	--	--	--	--	--	--	--	--	--	--
279	c172606_g1	33,93898577	1,102184382	4,9445	6,88E-06	0,0058966	Up-regulated		XP_002300874.1	GLUCAN SYNTHASE-LIKE 11 family protein [Populus trichocarpa]>gi|222842600|gb|EEE80147.1| GLUCAN SYNTHASE-LIKE 11 family protein [Populus trichocarpa]	XM_010558837.1	PREDICTED: Tarenaya hassleriana callose synthase 7 (LOC104826231), transcript variant X2, mRNA	K11000	CALS	callose synthase	Q9SHJ3	Callose synthase 7 OS=Arabidopsis thaliana GN=CALS7 PE=3 SV=3	--	--	--	--	--	--	--	--	--
280	c161056_g1	22,97519772	186,3273968	-3,0197	6,92E-06	0,00591	Down-regulated		XP_010909460.1	PREDICTED: LOW QUALITY PROTEIN: transcription factor PIF3-like [Elaeis guineensis]	--	--	--	--	--	--	--	--	--	--	--	--	--	--	--	--
281	c174560_g1	2,439966108	39,62303861	-4,0214	6,98E-06	0,0059459	Down-regulated		KHN30958.1	Retrovirus-related Pol polyprotein from transposon TNT 1-94, partial [Glycine soja]	--	--	--	--	--	P10978	Retrovirus-related Pol polyprotein from transposon TNT 1-94 OS=Nicotiana tabacum PE=2 SV=1	PF13683//PF00665	Integrase core domain//Integrase core domain	GO:0015074	DNA integration	--	--	--	--	--
282	c209767_g1	24,38391737	0	-	7,32E-06	0,0062051	Up-regulated		XP_010524744.1	PREDICTED: uncharacterized protein LOC104802714 [Tarenaya hassleriana]>gi|729458497|ref|XP_010524746.1| PREDICTED: uncharacterized protein LOC104802714 [Tarenaya hassleriana]>gi|729458500|ref|XP_010524747.1| PREDICTED: uncharacterized protein LOC104802714 [Tarenaya hassleriana]	--	--	--	--	--	--	--	--	--	--	--	--	--	--	--	--
283	c129216_g2	24,04758341	0	-	8,03E-06	0,006726	Up-regulated		--	--	--	--	--	--	--	--	--	--	--	--	--	--	--	--	--	--
284	c164822_g1	0	22,2248045	-	8,04E-06	0,006726	Down-regulated		--	--	--	--	--	--	--	--	--	--	--	--	--	--	--	--	--	--
285	c166372_g2	162,3966382	40,67099575	1,9974	8,02E-06	0,006726	Up-regulated		XP_010530580.1	PREDICTED: LINE-1 retrotransposable element ORF2 protein isoform X9 [Tarenaya hassleriana]	--	--	--	--	--	O00370	LINE-1 retrotransposable element ORF2 protein OS=Homo sapiens PE=1 SV=1	--	--	--	--	--	--	--	--	--
286	c37365_g1	0	21,95765893	-	7,97E-06	0,006726	Down-regulated		XP_010243263.1	PREDICTED: uncharacterized protein LOC104587376 [Nelumbo nucifera]	--	--	--	--	--	--	--	PF00098	Zinc knuckle	--	--	GO:0003676//GO:0008270	nucleic acid binding//zinc ion binding	--	--	--
287	c158531_g2	48,69042603	203,6074605	-2,0641	8,55E-06	0,007124	Down-regulated		XP_010264261.1	PREDICTED: small heat shock protein, chloroplastic-like [Nelumbo nucifera]	XM_010919011.1	PREDICTED: Elaeis guineensis small heat shock protein, chloroplastic-like (LOC105041935), transcript variant X2, mRNA	K13993	HSP20	HSP20 family protein	P46254	Heat shock 22 kDa protein, mitochondrial OS=Pisum sativum GN=HSP22 PE=2 SV=1	--	--	--	--	--	--	--	--	--
288	c174989_g8	23,80746507	0	-	8,59E-06	0,0071361	Up-regulated		XP_008466095.1	PREDICTED: uncharacterized protein LOC103503621 [Cucumis melo]>gi|659132242|ref|XP_008466096.1| PREDICTED: uncharacterized protein LOC103503621 [Cucumis melo]	--	--	--	--	--	--	--	--	--	--	--	--	--	--	--	--
289	c130225_g1	447,4442731	123,7406727	1,8544	9,00E-06	0,0074227	Up-regulated		XP_008797135.1	PREDICTED: uncharacterized protein LOC103712398 [Phoenix dactylifera]	XM_010931399.1	PREDICTED: Elaeis guineensis uncharacterized LOC105051106 (LOC105051106), transcript variant X2, mRNA	--	--	--	P24297	Rubredoxin OS=Pyrococcus furiosus (strain ATCC 43587 / DSM 3638 / JCM 8422 / Vc1) GN=rub PE=1 SV=2	PF00301//PF01155//PF04828//PF05191//PF02150	Rubredoxin//Hydrogenase/urease nickel incorporation, metallochaperone, hypA//Glutathione-dependent formaldehyde-activating enzyme//Adenylate kinase, active site lid//RNA polymerases M/15 Kd subunit	GO:0006144//GO:0008152//GO:0006206//GO:0006351//GO:0046034//GO:0006464	purine nucleobase metabolic process//metabolic process//pyrimidine nucleobase metabolic process//transcription, DNA-templated//ATP metabolic process//cellular protein modification process	GO:0016151//GO:0005506//GO:0016846//GO:0003677//GO:0003899//GO:0004017	nickel cation binding//iron ion binding//carbon-sulfur lyase activity//DNA binding//DNA-directed RNA polymerase activity//adenylate kinase activity	GO:0005730	nucleolus	--
290	c226767_g1	23,83498289	0	-	8,97E-06	0,0074227	Up-regulated		XP_008219733.1	PREDICTED: protein FAR1-RELATED SEQUENCE 5-like [Prunus mume]	--	--	--	--	--	--	--	--	--	--	--	--	--	--	--	--
291	c146858_g1	27,72449217	0,333488125	6,3774	9,08E-06	0,007467	Up-regulated		--	--	--	--	--	--	--	--	--	--	--	--	--	--	--	--	--	--
292	c119873_g1	36,21511409	1,629426173	4,4742	9,22E-06	0,0075493	Up-regulated		XP_010907638.1	PREDICTED: cysteine-rich receptor-like protein kinase 2 [Elaeis guineensis]	XM_010942007.1	PREDICTED: Elaeis guineensis cysteine-rich receptor-like protein kinase 2 (LOC105058923), mRNA	--	--	--	Q9CAL3	Cysteine-rich receptor-like protein kinase 2 OS=Arabidopsis thaliana GN=CRK2 PE=2 SV=1	PF01529//PF03494//PF00069//PF07714	DHHC palmitoyltransferase//Beta-amyloid peptide (beta-APP)//Protein kinase domain//Protein tyrosine kinase	GO:0006468	protein phosphorylation	GO:0008270//GO:0005524//GO:0004672	zinc ion binding//ATP binding//protein kinase activity	GO:0016021	integral component of membrane	--
293	c156710_g2	239,625566	831,2234506	-1,7945	9,43E-06	0,0076964	Down-regulated		XP_010918309.1	PREDICTED: uncharacterized protein LOC105042713 [Elaeis guineensis]	--	--	--	--	--	--	--	PF04508	Viral A-type inclusion protein repeat	GO:0016032	viral process	--	--	--	--	--
294	c172043_g4	1,645184098	364,378763	-7,791	9,68E-06	0,0078766	Down-regulated		EPS67093.1	hypothetical protein M569_07682, partial [Genlisea aurea]	--	--	--	--	--	O80932	Expansin-A3 OS=Arabidopsis thaliana GN=EXPA3 PE=2 SV=1	--	--	--	--	--	--	--	--	--
295	c159292_g2	166,3678297	35,99036014	2,2087	1,04E-05	0,0084187	Up-regulated		XP_008798668.1	PREDICTED: cytochrome b5-like isoform X1 [Phoenix dactylifera]>gi|672157893|ref|XP_008798669.1| PREDICTED: cytochrome b5-like isoform X2 [Phoenix dactylifera]	--	--	--	--	--	O22704	Cytochrome B5-like protein OS=Arabidopsis thaliana GN=CB5LP PE=2 SV=1	--	--	--	--	--	--	--	--	KOG0537
296	c115114_g2	1002,828529	290,6395187	1,7868	1,08E-05	0,0087473	Up-regulated		XP_009395148.1	PREDICTED: glycine cleavage system H protein, mitochondrial-like [Musa acuminata subsp. malaccensis]	XM_009396873.1	PREDICTED: Musa acuminata subsp. malaccensis glycine cleavage system H protein, mitochondrial-like (LOC103980445), mRNA	K02437	gcvH, GCSH	glycine cleavage system H protein	A3C6G9	Glycine cleavage system H protein, mitochondrial OS=Oryza sativa subsp. japonica GN=GDCSH PE=1 SV=1	--	--	--	--	--	--	--	--	KOG3373
297	c173290_g3	576,6070279	146,6150515	1,9756	1,16E-05	0,0093598	Up-regulated		KJB40446.1	hypothetical protein B456_007G063700 [Gossypium raimondii]	XM_011047411.1	PREDICTED: Populus euphratica actin-7 (LOC105140541), mRNA	K10355	ACTF	actin, other eukaryote	P24902	Actin (Fragment) OS=Pinus contorta PE=3 SV=1	--	--	--	--	--	--	--	--	KOG0676
298	c174719_g8	64,60677296	7,586926538	3,0901	1,21E-05	0,0096957	Up-regulated		CAN76793.1	hypothetical protein VITISV_026680 [Vitis vinifera]	--	--	K07437	CYP26A	cytochrome P450, family 26, subfamily A	Q7LHG5	Transposon Ty3-I Gag-Pol polyprotein OS=Saccharomyces cerevisiae (strain ATCC 204508 / S288c) GN=TY3B-I PE=3 SV=2	PF07348	Syd protein (SUKH-2)	--	--	--	--	GO:0009898	cytoplasmic side of plasma membrane	KOG0017
299	c129651_g1	26,98627739	0,481224962	5,8094	1,22E-05	0,0097563	Up-regulated		--	--	--	--	--	--	--	--	--	--	--	--	--	--	--	--	--	--
300	c159179_g1	0,319058642	33,49346817	-6,7139	1,29E-05	0,010255	Down-regulated		AJF38259.1	glycosyltransferase family 43 IRX9-like protein [Asparagus officinalis]	--	--	--	--	--	Q6AT32	Probable glucuronosyltransferase Os05g0559600 OS=Oryza sativa subsp. japonica GN=Os05g0559600 PE=2 SV=1	PF03360	Glycosyltransferase family 43	GO:0030206	chondroitin sulfate biosynthetic process	GO:0015018	galactosylgalactosylxylosylprotein 3-beta-glucuronosyltransferase activity	GO:0016020	membrane	--
301	c151272_g1	0	21,28731474	-	1,31E-05	0,010411	Down-regulated		XP_012846841.1	PREDICTED: uncharacterized protein LOC105966808 isoform X1 [Erythranthe guttatus]>gi|848893604|ref|XP_012846842.1| PREDICTED: uncharacterized protein LOC105966808 isoform X2 [Erythranthe guttatus]>gi|848893606|ref|XP_012846843.1| PREDICTED: uncharacterized protein LOC105966808 isoform X3 [Erythranthe guttatus]	--	--	--	--	--	--	--	--	--	--	--	--	--	--	--	--
302	c143867_g1	23,03663472	0	-	1,38E-05	0,010923	Up-regulated		XP_004308928.1	PREDICTED: probable LRR receptor-like serine/threonine-protein kinase At3g47570 [Fragaria vesca subsp. vesca]	--	--	K13428	EFR	LRR receptor-like serine/threonine-protein kinase EFR	C0LGT6	LRR receptor-like serine/threonine-protein kinase EFR OS=Arabidopsis thaliana GN=EFR PE=1 SV=1	PF11734//PF13855//PF00560	TilS substrate C-terminal domain//Leucine rich repeat//Leucine Rich Repeat	GO:0008033	tRNA processing	GO:0005515//GO:0016879//GO:0000166//GO:0005524	protein binding//ligase activity, forming carbon-nitrogen bonds//nucleotide binding//ATP binding	GO:0005737	cytoplasm	--
303	c173885_g3	105,7977192	19,15706882	2,4654	1,44E-05	0,011378	Up-regulated		--	--	--	--	--	--	--	--	--	--	--	--	--	--	--	--	--	--
304	c171970_g1	0	21,063549	-	1,64E-05	0,012871	Down-regulated		--	--	--	--	--	--	--	--	--	--	--	--	--	--	--	--	--	--
305	c106982_g2	22,46956551	0	-	1,70E-05	0,013361	Up-regulated		--	--	--	--	--	--	--	--	--	PF12300	Protein of unknown function (DUF3628)	--	--	GO:0016817	hydrolase activity, acting on acid anhydrides	--	--	--
306	c160154_g1	72,35588268	276,0736635	-1,9319	1,74E-05	0,013574	Down-regulated		XP_010904642.1	PREDICTED: DEAD-box ATP-dependent RNA helicase 53-like isoform X2 [Elaeis guineensis]	--	--	--	--	--	Q0ILZ4	DEAD-box ATP-dependent RNA helicase 9 OS=Oryza sativa subsp. japonica GN=Os12g0611200 PE=2 SV=1	--	--	--	--	--	--	--	--	KOG0343
307	c158221_g2	22,30081096	0	-	1,79E-05	0,013923	Up-regulated		--	--	--	--	--	--	--	--	--	--	--	--	--	--	--	--	--	--
308	c119252_g1	34,3939554	1,389655678	4,6294	1,80E-05	0,013966	Up-regulated		--	--	--	--	--	--	--	--	--	--	--	--	--	--	--	--	--	--
309	c37825_g1	22,38760275	0	-	1,84E-05	0,014219	Up-regulated		--	--	--	--	--	--	--	--	--	--	--	--	--	--	--	--	--	--
310	c174313_g4	236,9474636	745,9618181	-1,6545	1,87E-05	0,014461	Down-regulated		XP_009416639.1	PREDICTED: thymidylate kinase isoform X2 [Musa acuminata subsp. malaccensis]	XM_008672373.1	PREDICTED: Zea mays thymidylate kinase-like (LOC103647875), mRNA	K00943	tmk, DTYMK	dTMP kinase	Q54GN2	Thymidylate kinase OS=Dictyostelium discoideum GN=dtymk PE=3 SV=1	--	--	--	--	--	--	--	--	KOG3327
311	c174729_g1	78,82862936	11,39503037	2,7903	1,89E-05	0,014504	Up-regulated		--	--	--	--	--	--	--	--	--	--	--	--	--	--	--	--	--	--
312	c164202_g1	0,954153472	28,67248523	-4,9093	1,94E-05	0,014833	Down-regulated		--	--	--	--	--	--	--	--	--	--	--	--	--	--	--	--	--	--
313	c154276_g1	80,70238568	12,40349713	2,7019	1,97E-05	0,014892	Up-regulated		XP_010941678.1	PREDICTED: glyceraldehyde-3-phosphate dehydrogenase GAPCP1, chloroplastic-like [Elaeis guineensis]	--	--	K00134	GAPDH, gapA	glyceraldehyde 3-phosphate dehydrogenase	Q5E924	Glyceraldehyde-3-phosphate dehydrogenase GAPCP2, chloroplastic OS=Arabidopsis thaliana GN=GAPCP2 PE=2 SV=1	--	--	--	--	--	--	--	--	--
314	c154658_g1	0	20,67677261	-	1,97E-05	0,014892	Down-regulated		--	--	--	--	--	--	--	--	--	--	--	--	--	--	--	--	--	--
315	c159179_g2	1,169776449	44,8078352	-5,2594	1,97E-05	0,014892	Down-regulated		AJF38259.1	glycosyltransferase family 43 IRX9-like protein [Asparagus officinalis]	--	--	--	--	--	Q9SXC4	Probable beta-1,4-xylosyltransferase IRX9H OS=Arabidopsis thaliana GN=IRX9H PE=2 SV=2	PF03360	Glycosyltransferase family 43	GO:0030206	chondroitin sulfate biosynthetic process	GO:0015018	galactosylgalactosylxylosylprotein 3-beta-glucuronosyltransferase activity	GO:0016020	membrane	--
316	c169149_g1	273,4525752	74,87946707	1,8686	1,97E-05	0,014892	Up-regulated		XP_010927348.1	PREDICTED: uncharacterized protein LOC105049416 isoform X1 [Elaeis guineensis]	--	--	--	--	--	--	--	--	--	--	--	--	--	--	--	--
317	c47570_g1	655,9834049	190,9590229	1,7804	1,96E-05	0,014892	Up-regulated		XP_008806263.1	PREDICTED: RNA polymerase II degradation factor 1-like [Phoenix dactylifera]	--	--	--	--	--	--	--	PF16094//PF01056//PF04889	Proteasome assembly chaperone 4//Myc amino-terminal region//Cwf15/Cwc15 cell cycle control protein	GO:0006355//GO:0043248//GO:0000398	regulation of transcription, DNA-templated//proteasome assembly//mRNA splicing, via spliceosome	GO:0003700	transcription factor activity, sequence-specific DNA binding	GO:0005681//GO:0005783//GO:0005667	spliceosomal complex//endoplasmic reticulum//transcription factor complex	--
318	c147979_g2	2910,826701	8979,052364	-1,6251	2,07E-05	0,015503	Down-regulated		XP_010933036.1	PREDICTED: acyl-[acyl-carrier-protein] desaturase 5, chloroplastic-like [Elaeis guineensis]	XM_010526043.1	PREDICTED: Tarenaya hassleriana acyl-[acyl-carrier-protein] desaturase 2, chloroplastic (LOC104802432), transcript variant X2, mRNA	K03921	DESA1	acyl-	P29108	Acyl-[acyl-carrier-protein] desaturase, chloroplastic OS=Brassica napus PE=2 SV=1	PF03405//PF02915	Fatty acid desaturase//Rubrerythrin	GO:0055114//GO:0006631	oxidation-reduction process//fatty acid metabolic process	GO:0046872//GO:0045300//GO:0016491	metal ion binding//acyl-[acyl-carrier-protein] desaturase activity//oxidoreductase activity	--	--	--
319	c288878_g1	28,20779204	0	-	2,06E-05	0,015503	Up-regulated		--	--	--	--	--	--	--	--	--	--	--	--	--	--	--	--	--	--
320	c164226_g1	28,62270984	0,962449923	4,8943	2,09E-05	0,01558	Up-regulated		ADY77002.1	iron-sulfur cluster assembly protein NFU4 [Ipomoea batatas]>gi|325087311|gb|ADY77005.1| iron-sulfur cluster assembly protein NFU4 [Ipomoea batatas]	--	--	--	--	--	Q9C8J2	NifU-like protein 5, mitochondrial OS=Arabidopsis thaliana GN=NIFU5 PE=2 SV=1	PF07646//PF01106	Kelch motif//NifU-like domain	GO:0016226	iron-sulfur cluster assembly	GO:0005488//GO:0005506//GO:0051536//GO:0005515	binding//iron ion binding//iron-sulfur cluster binding//protein binding	--	--	--
321	c102211_g1	2367,019064	749,4429883	1,6592	2,11E-05	0,015633	Up-regulated		XP_008783427.1	PREDICTED: photosystem II 22 kDa protein, chloroplastic [Phoenix dactylifera]	--	--	K03542	psbS	photosystem II 22kDa protein	Q02060	Photosystem II 22 kDa protein, chloroplastic OS=Spinacia oleracea GN=PSBS PE=1 SV=1	--	--	--	--	--	--	--	--	--
322	c166370_g1	510,4665446	1549,845275	-1,6022	2,11E-05	0,015633	Down-regulated		YP_006291825.1	orf57 gene product (mitochondrion) [Daucus carota subsp. sativus]>gi|374082010|gb|AEY81202.1| orf57 (mitochondrion) [Daucus carota subsp. sativus]	--	--	--	--	--	--	--	PF01213	Adenylate cyclase associated (CAP) N terminal	GO:0007010	cytoskeleton organization	GO:0003779	actin binding	--	--	--
323	c170822_g5	22,10061598	0	-	2,10E-05	0,015633	Up-regulated		--	--	--	--	--	--	--	--	--	--	--	--	--	--	--	--	--	--
324	c157398_g2	40,04751244	1,102184382	5,1833	2,12E-05	0,015641	Up-regulated		--	--	--	--	--	--	--	--	--	--	--	--	--	--	--	--	--	--
325	c84530_g1	45,60986388	180,8376342	-1,9873	2,19E-05	0,016121	Down-regulated		--	--	--	--	--	--	--	--	--	PF04281//PF15761//PF05793	Mitochondrial import receptor subunit Tom22//Immortalisation up-regulated protein//Transcription initiation factor IIF, alpha subunit (TFIIF-alpha)	GO:0006886//GO:0006367//GO:0032968	intracellular protein transport//transcription initiation from RNA polymerase II promoter//positive regulation of transcription elongation from RNA polymerase II promoter	GO:0003677	DNA binding	GO:0005741//GO:0005634	mitochondrial outer membrane//nucleus	--
326	c167858_g3	78,28248935	11,38534402	2,7815	2,23E-05	0,016377	Up-regulated		--	--	--	--	--	--	--	--	--	--	--	--	--	--	--	--	--	--
327	c160347_g1	22,01445563	0	-	2,27E-05	0,016534	Up-regulated		--	--	--	--	--	--	--	--	--	--	--	--	--	--	--	--	--	--
328	c167616_g3	169,7127423	40,00917543	2,0847	2,27E-05	0,016534	Up-regulated		XP_002302840.2	hypothetical protein POPTR_0002s22140g [Populus trichocarpa]>gi|550345568|gb|EEE82113.2| hypothetical protein POPTR_0002s22140g [Populus trichocarpa]	--	--	--	--	--	--	--	--	--	--	--	--	--	--	--	--
329	c170433_g3	33,35386956	1,343638849	4,6336	2,31E-05	0,016807	Up-regulated		--	--	--	--	--	--	--	--	--	--	--	--	--	--	--	--	--	--
330	c167375_g1	65,93082864	309,9360886	-2,2329	2,39E-05	0,017288	Down-regulated		XP_010937384.1	PREDICTED: peroxidase 17-like [Elaeis guineensis]	XM_003578225.2	PREDICTED: Brachypodium distachyon peroxidase 17-like (LOC100833529), mRNA	K00430	E1.11.1.7	peroxidase	Q9SJZ2	Peroxidase 17 OS=Arabidopsis thaliana GN=PER17 PE=2 SV=1	PF07267//PF00141	Nucleopolyhedrovirus capsid protein P87//Peroxidase	GO:0006804//GO:0055114//GO:0006979	obsolete peroxidase reaction//oxidation-reduction process//response to oxidative stress	GO:0004601//GO:0020037	peroxidase activity//heme binding	GO:0019028	viral capsid	--
331	c100124_g1	8,075932114	2889,845065	-8,4831	2,40E-05	0,017301	Down-regulated		--	--	--	--	--	--	--	--	--	--	--	--	--	--	--	--	--	--
332	c169718_g1	63,20833656	9,360721605	2,7554	2,43E-05	0,017501	Up-regulated		--	--	--	--	--	--	--	--	--	--	--	--	--	--	--	--	--	--
333	c162735_g2	100,6243518	19,44044123	2,3718	2,52E-05	0,018121	Up-regulated		--	--	--	--	--	--	--	--	--	PF02298	Plastocyanin-like domain	GO:0006118	obsolete electron transport	GO:0009055	electron carrier activity	--	--	--
334	c128375_g1	0,531659165	31,03564769	-5,8673	2,65E-05	0,018962	Down-regulated		XP_010931198.1	PREDICTED: protein NDR1-like [Elaeis guineensis]	--	--	--	--	--	O48915	Protein NDR1 OS=Arabidopsis thaliana GN=NDR1 PE=1 SV=1	--	--	--	--	--	--	--	--	--
335	c155335_g1	32,41203389	1,287935671	4,6534	2,80E-05	0,019917	Up-regulated		--	--	--	--	--	--	--	--	--	--	--	--	--	--	--	--	--	--
336	c82754_g1	47,15720126	5,193438541	3,1827	2,80E-05	0,019917	Up-regulated		AGH20663.1	reverse transcriptase, partial [Turritis glabra]	--	--	K14641	APY1_2	apyrase	--	--	--	--	--	--	--	--	--	--	--
337	c101726_g1	0	18,9976482	-	2,87E-05	0,02036	Down-regulated		--	--	--	--	--	--	--	--	--	--	--	--	--	--	--	--	--	--
338	c172584_g5	1,216960598	724,2687689	-9,2171	2,88E-05	0,020393	Down-regulated		--	--	--	--	--	--	--	--	--	--	--	--	--	--	--	--	--	--
339	c135174_g1	38,89912116	2,104332729	4,2083	2,90E-05	0,020444	Up-regulated		XP_009389630.1	PREDICTED: alpha carbonic anhydrase 1, chloroplastic-like [Musa acuminata subsp. malaccensis]	--	--	K01674	cah	carbonic anhydrase	O04846	Alpha carbonic anhydrase 1, chloroplastic OS=Arabidopsis thaliana GN=ACA1 PE=1 SV=2	--	--	--	--	--	--	--	--	KOG0382
340	c159506_g1	0	166,6926902	-	2,92E-05	0,020502	Down-regulated		--	--	--	--	--	--	--	--	--	--	--	--	--	--	--	--	--	--
341	c139981_g1	24,97182805	0,333488125	6,2265	2,96E-05	0,020766	Up-regulated		CDP14239.1	unnamed protein product [Coffea canephora]	--	--	--	--	--	--	--	PF03552//PF16588	Cellulose synthase//C2H2 zinc-finger	GO:0005982//GO:0005985//GO:0006011//GO:0030244	starch metabolic process//sucrose metabolic process//UDP-glucose metabolic process//cellulose biosynthetic process	GO:0003676//GO:0008270//GO:0016760	nucleic acid binding//zinc ion binding//cellulose synthase (UDP-forming) activity	GO:0016020	membrane	--
342	c121763_g1	0	19,72159412	-	2,99E-05	0,02087	Down-regulated		--	--	--	--	--	--	--	--	--	--	--	--	--	--	--	--	--	--
343	c171393_g2	0	19,66589094	-	3,03E-05	0,021121	Down-regulated		--	--	--	--	--	--	--	--	--	--	--	--	--	--	--	--	--	--
344	c173188_g2	219,635101	671,9784978	-1,6133	3,04E-05	0,021138	Down-regulated		--	--	--	--	--	--	--	--	--	--	--	--	--	--	--	--	--	--
345	c85189_g1	3,559535953	51,92240081	-3,8666	3,09E-05	0,021406	Down-regulated		ERN13065.1	hypothetical protein AMTR_s00040p00140300 [Amborella trichopoda]	--	--	--	--	--	--	--	--	--	--	--	--	--	--	--	--
346	c164390_g1	0	33,02192956	-	3,15E-05	0,021783	Down-regulated		--	--	XM_012847808.1	PREDICTED: Setaria italica uncharacterized LOC101775038 (LOC101775038), mRNA	--	--	--	--	--	--	--	--	--	--	--	--	--	--
347	c113668_g1	44,19176115	179,2650736	-2,0202	3,18E-05	0,021907	Down-regulated		XP_010933881.1	PREDICTED: lysophospholipid acyltransferase 1-like [Elaeis guineensis]	--	--	--	--	--	--	--	--	--	--	--	--	--	--	--	--
348	c150598_g1	50,24607086	4,024598141	3,6421	3,27E-05	0,022443	Up-regulated		EPS63383.1	hypothetical protein M569_11401 [Genlisea aurea]	--	--	--	--	--	O00370	LINE-1 retrotransposable element ORF2 protein OS=Homo sapiens PE=1 SV=1	PF06449	Mitochondrial domain of unknown function (DUF1082)	--	--	GO:0016820	hydrolase activity, acting on acid anhydrides, catalyzing transmembrane movement of substances	GO:0016021//GO:0005739	integral component of membrane//mitochondrion	KOG1075
349	c151168_g2	98,7271468	348,1158698	-1,818	3,28E-05	0,02246	Down-regulated		XP_009412392.1	PREDICTED: probable 3-ketoacyl-CoA synthase 2 [Musa acuminata subsp. malaccensis]	XM_009414117.1	PREDICTED: Musa acuminata subsp. malaccensis probable 3-ketoacyl-CoA synthase 2 (LOC103993891), mRNA	K15397	KCS	3-ketoacyl-CoA synthase	Q9MAM3	3-ketoacyl-CoA synthase 1 OS=Arabidopsis thaliana GN=KCS1 PE=2 SV=1	PF08392//PF01754	FAE1/Type III polyketide synthase-like protein//A20-like zinc finger	GO:0006633	fatty acid biosynthetic process	GO:0016747//GO:0003677//GO:0008270	transferase activity, transferring acyl groups other than amino-acyl groups//DNA binding//zinc ion binding	GO:0016020	membrane	--
350	c157659_g1	241,9865338	63,88224325	1,9214	3,30E-05	0,022565	Up-regulated		XP_008795093.1	PREDICTED: pyruvate, phosphate dikinase, chloroplastic [Phoenix dactylifera]	XM_008796871.1	PREDICTED: Phoenix dactylifera pyruvate, phosphate dikinase, chloroplastic (LOC103710937), transcript variant X2, mRNA	K01006	ppdK	pyruvate, orthophosphate dikinase	Q42910	Pyruvate, phosphate dikinase, chloroplastic OS=Mesembryanthemum crystallinum GN=PPD PE=2 SV=1	PF00391//PF03328//PF02896//PF01326//PF07137	PEP-utilising enzyme, mobile domain//HpcH/HpaI aldolase/citrate lyase family//PEP-utilising enzyme, TIM barrel domain//Pyruvate phosphate dikinase, PEP/pyruvate binding domain//VDE lipocalin domain	GO:0016310//GO:0055114	phosphorylation//oxidation-reduction process	GO:0046422//GO:0016301//GO:0016772//GO:0003824//GO:0005524	violaxanthin de-epoxidase activity//kinase activity//transferase activity, transferring phosphorus-containing groups//catalytic activity//ATP binding	GO:0009507	chloroplast	--
351	c140688_g1	509,3437767	1500,41243	-1,5586	3,41E-05	0,023216	Down-regulated		XP_010930371.1	PREDICTED: uncharacterized protein LOC105051566 [Elaeis guineensis]	--	--	K06995	K06995	uncharacterized protein	--	--	--	--	--	--	--	--	--	--	--
352	c166592_g1	49,96124712	4,605859138	3,4393	3,42E-05	0,023216	Up-regulated		--	--	--	--	--	--	--	--	--	PF11081	Protein of unknown function (DUF2890)	GO:0016032	viral process	--	--	--	--	--
353	c173161_g5	1,432583576	31,19338434	-4,4445	3,43E-05	0,023216	Down-regulated		--	--	--	--	--	--	--	--	--	--	--	--	--	--	--	--	--	--
354	c175047_g5	58,70046406	6,524440579	3,1694	3,44E-05	0,023216	Up-regulated		ABD63135.1	Retrotransposon gag protein [Asparagus officinalis]	--	--	--	--	--	--	--	--	--	--	--	--	--	--	--	--
355	c163312_g1	10,82286704	70,84023469	-2,7105	3,50E-05	0,023555	Down-regulated		XP_009414854.1	PREDICTED: uncharacterized protein At4g26450 isoform X2 [Musa acuminata subsp. malaccensis]	--	--	--	--	--	--	--	--	--	--	--	--	--	--	--	--
356	c131595_g1	99,63691612	343,9301657	-1,7874	3,57E-05	0,023783	Down-regulated		--	--	--	--	--	--	--	--	--	PF13851//PF07716//PF10186//PF03131//PF11264//PF15898//PF06156//PF00170//PF06005//PF02183	Growth-arrest specific micro-tubule binding//Basic region leucine zipper//Vacuolar sorting 38 and autophagy-related subunit 14//bZIP Maf transcription factor//Thylakoid formation protein//cGMP-dependent protein kinase interacting domain//Protein of unknown function (DUF972)//bZIP transcription factor//Protein of unknown function (DUF904)//Homeobox associated leucine zipper	GO:0010207//GO:0043093//GO:0006260//GO:0000917//GO:0006355//GO:0048870//GO:0015979//GO:0010508	photosystem II assembly//FtsZ-dependent cytokinesis//DNA replication//barrier septum assembly//regulation of transcription, DNA-templated//cell motility//photosynthesis//positive regulation of autophagy	GO:0003700//GO:0043565//GO:0003677//GO:0019901	transcription factor activity, sequence-specific DNA binding//sequence-specific DNA binding//DNA binding//protein kinase binding	GO:0005667//GO:0005737//GO:0005634//GO:0031514	transcription factor complex//cytoplasm//nucleus//motile cilium	--
357	c167421_g1	309,8467443	1175,933327	-1,9242	3,57E-05	0,023783	Down-regulated		XP_008783922.1	PREDICTED: transcription factor PCF5-like [Phoenix dactylifera]>gi|672121256|ref|XP_008783923.1| PREDICTED: transcription factor PCF5-like [Phoenix dactylifera]>gi|672121258|ref|XP_008783924.1| PREDICTED: transcription factor PCF5-like [Phoenix dactylifera]>gi|672121260|ref|XP_008783925.1| PREDICTED: transcription factor PCF5-like [Phoenix dactylifera]	XM_009421513.1	PREDICTED: Musa acuminata subsp. malaccensis transcription factor PCF5-like (LOC103999693), mRNA	--	--	--	Q8LPR5	Transcription factor TCP4 OS=Arabidopsis thaliana GN=TCP4 PE=1 SV=1	PF01213	Adenylate cyclase associated (CAP) N terminal	GO:0007010	cytoskeleton organization	GO:0003779	actin binding	--	--	--
358	c169960_g1	129,6527366	915,0460663	-2,8192	3,57E-05	0,023783	Down-regulated		AFJ53023.1	UDP-glycosyltransferase 1 [Linum usitatissimum]	XM_010945065.1	PREDICTED: Elaeis guineensis UDP-glycosyltransferase 89B1-like (LOC105061107), mRNA	--	--	--	Q9C9B0	UDP-glycosyltransferase 89B1 OS=Arabidopsis thaliana GN=UGT89B1 PE=2 SV=2	PF00816//PF00201	H-NS histone family//UDP-glucoronosyl and UDP-glucosyl transferase	GO:0006355//GO:0008152	regulation of transcription, DNA-templated//metabolic process	GO:0003677//GO:0016758	DNA binding//transferase activity, transferring hexosyl groups	GO:0005622	intracellular	--
359	c173091_g2	11,61160414	72,38582497	-2,6401	3,56E-05	0,023783	Down-regulated		XP_006857652.1	PREDICTED: probable sucrose-phosphate synthase 3 [Amborella trichopoda]>gi|548861748|gb|ERN19119.1| hypothetical protein AMTR_s00061p00145220 [Amborella trichopoda]	--	--	K00696	E2.4.1.14	sucrose-phosphate synthase	Q0JGK4	Probable sucrose-phosphate synthase 1 OS=Oryza sativa subsp. japonica GN=SPS1 PE=2 SV=2	--	--	--	--	--	--	--	--	--
360	c296759_g1	45,40641846	5,774699539	2,9751	3,99E-05	0,026481	Up-regulated		--	--	--	--	--	--	--	--	--	--	--	--	--	--	--	--	--	--
361	c166756_g1	50,34228647	5,409201905	3,2183	4,15E-05	0,027499	Up-regulated		XP_008801184.1	PREDICTED: beta-glucosidase 31-like [Phoenix dactylifera]	--	--	K01188	E3.2.1.21	beta-glucosidase	B7F7K7	Beta-glucosidase 31 OS=Oryza sativa subsp. japonica GN=BGLU31 PE=2 SV=1	PF00232	Glycosyl hydrolase family 1	GO:0005975	carbohydrate metabolic process	GO:0004553	hydrolase activity, hydrolyzing O-glycosyl compounds	--	--	--
362	c152268_g2	0	18,78020087	-	4,18E-05	0,027518	Down-regulated		--	--	--	--	--	--	--	--	--	--	--	--	--	--	--	--	--	--
363	c166084_g1	35,95203199	1074,325841	-4,9012	4,17E-05	0,027518	Down-regulated		--	--	--	--	--	--	--	--	--	--	--	--	--	--	--	--	--	--
364	c175219_g1	884,8215435	191,9701267	2,2045	4,26E-05	0,027957	Up-regulated		XP_009595461.1	PREDICTED: uncharacterized protein LOC104091763 [Nicotiana tomentosiformis]>gi|697173073|ref|XP_009595463.1| PREDICTED: uncharacterized protein LOC104091763 [Nicotiana tomentosiformis]>gi|697173075|ref|XP_009595464.1| PREDICTED: uncharacterized protein LOC104091763 [Nicotiana tomentosiformis]>gi|697173077|ref|XP_009595465.1| PREDICTED: uncharacterized protein LOC104091763 [Nicotiana tomentosiform…	--	--	--	--	--	--	--	PF00872	Transposase, Mutator family	GO:0006313	transposition, DNA-mediated	GO:0004803//GO:0003677	transposase activity//DNA binding	--	--	--
365	c169911_g3	24,00558475	0,333488125	6,1696	4,39E-05	0,028747	Up-regulated		--	--	--	--	--	--	--	--	--	--	--	--	--	--	--	--	--	--
366	c172143_g5	0,316036187	41,39093275	-7,0331	4,40E-05	0,028747	Down-regulated		--	--	--	--	--	--	--	--	--	--	--	--	--	--	--	--	--	--
367	c146272_g1	28,93811459	1,148201212	4,6555	4,47E-05	0,029113	Up-regulated		--	--	--	--	--	--	--	--	--	--	--	--	--	--	--	--	--	--
368	c167466_g1	8914,214448	25107,16713	-1,4939	4,51E-05	0,029315	Down-regulated		XP_010923095.1	PREDICTED: glycerol-3-phosphate 2-O-acyltransferase 6 [Elaeis guineensis]	XM_009394412.1	PREDICTED: Musa acuminata subsp. malaccensis glycerol-3-phosphate 2-O-acyltransferase 6-like (LOC103978575), mRNA	K13508	GPAT	glycerol-3-phosphate acyltransferase	O80437	Glycerol-3-phosphate 2-O-acyltransferase 6 OS=Arabidopsis thaliana GN=GPAT6 PE=1 SV=1	PF02949//PF01553	7tm Odorant receptor//Acyltransferase	GO:0008152//GO:0007187//GO:0007608	metabolic process//G-protein coupled receptor signaling pathway, coupled to cyclic nucleotide second messenger//sensory perception of smell	GO:0004984//GO:0016746//GO:0005549	olfactory receptor activity//transferase activity, transferring acyl groups//odorant binding	GO:0016020	membrane	--
369	c165588_g4	1,967265196	34,52152971	-4,1332	4,54E-05	0,029391	Down-regulated		--	--	--	--	--	--	--	--	--	--	--	--	--	--	--	--	--	--
370	c39189_g1	33,1181768	149,2375666	-2,1719	4,57E-05	0,029489	Down-regulated		XP_008812104.1	PREDICTED: protein PHLOEM PROTEIN 2-LIKE A10-like [Phoenix dactylifera]	--	--	--	--	--	Q9SY57	Protein PHLOEM PROTEIN 2-LIKE A10 OS=Arabidopsis thaliana GN=PP2A10 PE=2 SV=1	PF04612	Type II secretion system (T2SS), protein M	GO:0006858	extracellular transport	--	--	--	--	--
371	c180803_g1	0	19,70590283	-	4,59E-05	0,029591	Down-regulated		--	--	--	--	--	--	--	--	--	--	--	--	--	--	--	--	--	--
372	c157339_g1	40,99345796	2,965062645	3,7893	4,70E-05	0,030191	Up-regulated		XP_009389175.1	PREDICTED: amino acid permease 4-like [Musa acuminata subsp. malaccensis]	XM_009390900.1	PREDICTED: Musa acuminata subsp. malaccensis amino acid permease 4-like (LOC103975810), mRNA	--	--	--	Q38967	Amino acid permease 2 OS=Arabidopsis thaliana GN=AAP2 PE=1 SV=1	PF09510//PF04726	Rtt102p-like transcription regulator protein//Microvirus J protein	GO:0006338	chromatin remodeling	GO:0003677	DNA binding	GO:0016586//GO:0016514//GO:0005634	RSC complex//SWI/SNF complex//nucleus	--
373	c195204_g1	20,35804113	0	-	4,73E-05	0,03031	Up-regulated		--	--	--	--	--	--	--	--	--	--	--	--	--	--	--	--	--	--
374	c102092_g2	6,905839947	76,46317583	-3,4689	4,85E-05	0,031005	Down-regulated		XP_009408788.1	PREDICTED: piriformospora indica-insensitive protein 2-like [Musa acuminata subsp. malaccensis]	--	--	--	--	--	Q5PP26	Piriformospora indica-insensitive protein 2 OS=Arabidopsis thaliana GN=PII-2 PE=2 SV=1	PF13855//PF00560	Leucine rich repeat//Leucine Rich Repeat	--	--	GO:0005515	protein binding	--	--	KOG0619
375	c1283_g1	23,73673271	0,333488125	6,1533	4,94E-05	0,0315	Up-regulated		--	--	--	--	--	--	--	--	--	--	--	--	--	--	--	--	--	--
376	c172303_g1	105,2417049	18,95499932	2,4731	4,99E-05	0,031658	Up-regulated		XP_008788145.1	PREDICTED: poly [ADP-ribose] polymerase 3 isoform X2 [Phoenix dactylifera]	XM_011006218.1	PREDICTED: Populus euphratica poly [ADP-ribose] polymerase 3 (LOC105110991), mRNA	K10798	PARP	poly	Q9SWB4	Poly [ADP-ribose] polymerase 3 OS=Glycine max GN=PARP3 PE=2 SV=1	PF00301//PF02877//PF00644//PF08063	Rubredoxin//Poly(ADP-ribose) polymerase, regulatory domain//Poly(ADP-ribose) polymerase catalytic domain//PADR1 (NUC008) domain	GO:0006471	protein ADP-ribosylation	GO:0003950//GO:0005506	NAD+ ADP-ribosyltransferase activity//iron ion binding	GO:0005634	nucleus	KOG1037
377	c266288_g1	29,11570852	1,148201212	4,6644	4,99E-05	0,031658	Up-regulated		--	--	--	--	--	--	--	--	--	--	--	--	--	--	--	--	--	--
378	c174441_g3	68,81674401	493,480383	-2,8422	5,11E-05	0,032293	Down-regulated		XP_008804747.1	PREDICTED: uncharacterized protein LOC103717938 [Phoenix dactylifera]	XM_010934838.1	PREDICTED: Elaeis guineensis uncharacterized LOC105053605 (LOC105053605), transcript variant X2, mRNA	--	--	--	--	--	PF11525	Copper resistance protein K	--	--	GO:0046872	metal ion binding	--	--	--
379	c163956_g2	0,638117285	24,43717564	-5,2591	5,13E-05	0,032329	Down-regulated		--	--	--	--	--	--	--	--	--	--	--	--	--	--	--	--	--	--
380	c171065_g2	31,33671348	1,149885183	4,7683	5,14E-05	0,032343	Up-regulated		--	--	--	--	--	--	--	--	--	--	--	--	--	--	--	--	--	--
381	c175270_g1	581,1645046	187,352938	1,6332	5,18E-05	0,032491	Up-regulated		XP_010692480.1	PREDICTED: uncharacterized protein LOC104905592 [Beta vulgaris subsp. vulgaris]	--	--	K19619	TDP2	tyrosyl-DNA phosphodiesterase 2	P10978	Retrovirus-related Pol polyprotein from transposon TNT 1-94 OS=Nicotiana tabacum PE=2 SV=1	PF00665//PF13683//PF03586//PF05529//PF01810//PF00521	Integrase core domain//Integrase core domain//Herpesvirus UL36 tegument protein//B-cell receptor-associated protein 31-like//LysE type translocator//DNA gyrase/topoisomerase IV, subunit A	GO:0006265//GO:0039693//GO:0015074//GO:0006508//GO:0006886//GO:0006865	DNA topological change//viral DNA genome replication//DNA integration//proteolysis//intracellular protein transport//amino acid transport	GO:0003918//GO:0019784//GO:0005524//GO:0003677	DNA topoisomerase type II (ATP-hydrolyzing) activity//NEDD8-specific protease activity//ATP binding//DNA binding	GO:0016020//GO:0005783//GO:0016021	membrane//endoplasmic reticulum//integral component of membrane	KOG2756
382	c172104_g2	584,8464531	189,7230191	1,6242	5,23E-05	0,032703	Up-regulated		KDO46178.1	hypothetical protein CISIN_1g036608mg, partial [Citrus sinensis]	--	--	--	--	--	--	--	--	--	--	--	--	--	--	--	--
383	c147197_g1	33,62853852	0	-	5,54E-05	0,034551	Up-regulated		--	--	--	--	--	--	--	--	--	--	--	--	--	--	--	--	--	--
384	c95174_g1	2,850370593	36,55320147	-3,6808	5,63E-05	0,035042	Down-regulated		XP_009628182.1	PREDICTED: cullin-1-like isoform X2 [Nicotiana tomentosiformis]	--	--	K03347	CUL1, CDC53	cullin 1	Q94AH6	Cullin-1 OS=Arabidopsis thaliana GN=CUL1 PE=1 SV=1	PF00888//PF14865	Cullin family//Macin	GO:0006952//GO:0006511	defense response//ubiquitin-dependent protein catabolic process	GO:0031625	ubiquitin protein ligase binding	--	--	--
385	c141684_g1	19,92647946	0	-	5,65E-05	0,035051	Up-regulated		--	--	--	--	--	--	--	--	--	--	--	--	--	--	--	--	--	--
386	c118303_g1	1658,995749	578,3405302	1,5203	5,77E-05	0,035703	Up-regulated		ACY92095.1	photosystem I subunit H [Lycoris radiata]	GU143414.1	Lycoris radiata photosystem I subunit H (PsaH) mRNA, complete cds	K02695	psaH	photosystem I subunit VI	Q9SUI6	Photosystem I reaction center subunit VI-2, chloroplastic OS=Arabidopsis thaliana GN=PSAH2 PE=2 SV=1	PF03244	Photosystem I reaction centre subunit VI	GO:0015979	photosynthesis	--	--	GO:0009522//GO:0009538	photosystem I//photosystem I reaction center	--
387	c130781_g1	0	363,5059305	-	5,87E-05	0,03621	Down-regulated		XP_005649781.1	hypothetical protein COCSUDRAFT_52805 [Coccomyxa subellipsoidea C-169]>gi|384251760|gb|EIE25237.1| hypothetical protein COCSUDRAFT_52805 [Coccomyxa subellipsoidea C-169]	--	--	K07573	CSL4, EXOSC1	exosome complex component CSL4	Q9Y3B2	Exosome complex component CSL4 OS=Homo sapiens GN=EXOSC1 PE=1 SV=1	PF02777//PF10447//PF05843	Iron/manganese superoxide dismutases, C-terminal domain//Exosome component EXOSC1/CSL4//Suppressor of forked protein (Suf)	GO:0006801//GO:0006397//GO:0055114	superoxide metabolic process//mRNA processing//oxidation-reduction process	GO:0003723//GO:0046872//GO:0004784	RNA binding//metal ion binding//superoxide dismutase activity	GO:0005634//GO:0000178	nucleus//exosome (RNase complex)	KOG2396
388	c169488_g3	48,92364004	5,501235563	3,1527	5,88E-05	0,03621	Up-regulated		XP_010942740.1	PREDICTED: 26S proteasome non-ATPase regulatory subunit 13 homolog B [Elaeis guineensis]	--	--	--	--	--	--	--	--	--	--	--	--	--	--	--	--
389	c144675_g1	0	1641,410843	-	6,01E-05	0,036896	Down-regulated		--	--	--	--	--	--	--	--	--	--	--	--	--	--	--	--	--	--
390	c145949_g1	50,16739928	309,289178	-2,6241	6,04E-05	0,036999	Down-regulated		AAM82604.1	putative AP endonuclease/reverse transcriptase [Brassica napus]	--	--	--	--	--	P08548	LINE-1 reverse transcriptase homolog OS=Nycticebus coucang PE=3 SV=1	PF00098	Zinc knuckle	--	--	GO:0008270//GO:0003676	zinc ion binding//nucleic acid binding	--	--	KOG1075
391	c137340_g2	19,84149424	0	-	6,10E-05	0,037235	Up-regulated		--	--	--	--	--	--	--	--	--	--	--	--	--	--	--	--	--	--
392	c174313_g2	13,79783049	76,86553949	-2,4779	6,11E-05	0,037235	Down-regulated		--	--	--	--	--	--	--	--	--	--	--	--	--	--	--	--	--	--
393	c160074_g3	5735,871385	1837,548837	1,6422	6,16E-05	0,037432	Up-regulated		XP_009387401.1	PREDICTED: uncharacterized protein LOC103974324 [Musa acuminata subsp. malaccensis]	XM_010924071.1	PREDICTED: Elaeis guineensis uncharacterized LOC105045706 (LOC105045706), mRNA	--	--	--	--	--	PF16954	Haem-transporter, endosomal/lysosomal, haem-responsive gene	GO:0015886	heme transport	GO:0015232	heme transporter activity	--	--	--
394	c113069_g1	730,254849	2148,42047	-1,5568	6,22E-05	0,037636	Down-regulated		XP_010936692.1	PREDICTED: uncharacterized protein LOC105056255 [Elaeis guineensis]	NM_001054402.1	Oryza sativa Japonica Group Os02g0705400 (Os02g0705400) mRNA, complete cds	--	--	--	--	--	PF00582	Universal stress protein family	GO:0006950	response to stress	--	--	--	--	--
395	c144255_g1	28,47425306	0,954447546	4,8988	6,22E-05	0,037636	Up-regulated		XP_010648887.1	PREDICTED: uncharacterized protein LOC104879085 [Vitis vinifera]	--	--	--	--	--	--	--	--	--	--	--	--	--	--	--	--
396	c142840_g1	2693,800364	981,9700857	1,4559	6,39E-05	0,038587	Up-regulated		ACY92095.1	photosystem I subunit H [Lycoris radiata]	XM_010926291.1	PREDICTED: Elaeis guineensis photosystem I reaction center subunit VI, chloroplastic (LOC105047376), mRNA	K02695	psaH	photosystem I subunit VI	O04006	Photosystem I reaction center subunit VI, chloroplastic OS=Brassica campestris GN=PSAH PE=2 SV=1	PF03244	Photosystem I reaction centre subunit VI	GO:0015979	photosynthesis	--	--	GO:0009522//GO:0009538	photosystem I//photosystem I reaction center	--
397	c158467_g1	42,35125184	3,162184254	3,7434	6,64E-05	0,039841	Up-regulated		--	--	--	--	--	--	--	--	--	--	--	--	--	--	--	--	--	--
398	c160891_g2	25,82890648	0,814713087	4,9866	6,63E-05	0,039841	Up-regulated		CAN66710.1	hypothetical protein VITISV_006397 [Vitis vinifera]	AC254331.1	Phaseolus vulgaris clone PV_GBb030-G06, complete sequence	--	--	--	P10978	Retrovirus-related Pol polyprotein from transposon TNT 1-94 OS=Nicotiana tabacum PE=2 SV=1	PF13683//PF00665	Integrase core domain//Integrase core domain	GO:0015074	DNA integration	--	--	--	--	--
399	c9010_g2	0,265829582	20,76344089	-6,2874	6,75E-05	0,040422	Down-regulated		--	--	--	--	--	--	--	--	--	--	--	--	--	--	--	--	--	--
400	c223883_g1	6,681781039	76,61259663	-3,5193	6,81E-05	0,040705	Down-regulated		--	--	--	--	--	--	--	--	--	--	--	--	--	--	--	--	--	--
401	c159858_g1	189,0956483	52,79417494	1,8407	6,86E-05	0,040859	Up-regulated		--	--	--	--	--	--	--	--	--	--	--	--	--	--	--	--	--	--
402	c21242_g1	19,60471408	0	-	6,89E-05	0,040982	Up-regulated		--	--	--	--	--	--	--	--	--	PF08039	Mitochondrial proteolipid	--	--	--	--	GO:0005739	mitochondrion	--
403	c154909_g1	150,4000603	37,96613334	1,986	6,93E-05	0,041085	Up-regulated		XP_008804784.1	PREDICTED: alcohol dehydrogenase-like 7 isoform X1 [Phoenix dactylifera]	XM_004958294.2	PREDICTED: Setaria italica alcohol dehydrogenase-like 7 (LOC101781423), mRNA	K00121	frmA, ADH5, adhC	S-(hydroxymethyl)glutathione dehydrogenase / alcohol dehydrogenase	Q9FH04	Alcohol dehydrogenase-like 7 OS=Arabidopsis thaliana GN=At5g42250 PE=2 SV=1	PF08240//PF03721//PF00107//PF02826	Alcohol dehydrogenase GroES-like domain//UDP-glucose/GDP-mannose dehydrogenase family, NAD binding domain//Zinc-binding dehydrogenase//D-isomer specific 2-hydroxyacid dehydrogenase, NAD binding domain	GO:0055114	oxidation-reduction process	GO:0051287//GO:0016616	NAD binding//oxidoreductase activity, acting on the CH-OH group of donors, NAD or NADP as acceptor	--	--	KOG0022
404	c166779_g2	307,1768326	851,560009	-1,471	7,43E-05	0,043707	Down-regulated		XP_008778865.1	PREDICTED: U-box domain-containing protein 33-like isoform X2 [Phoenix dactylifera]	--	--	--	--	--	Q8GUH1	U-box domain-containing protein 33 OS=Arabidopsis thaliana GN=PUB33 PE=2 SV=2	--	--	--	--	--	--	--	--	KOG1187
405	c172626_g3	83,67121648	16,67081622	2,3274	7,41E-05	0,043707	Up-regulated		--	--	JN375330.1	Phoenix dactylifera mitochondrion, complete genome	--	--	--	--	--	--	--	--	--	--	--	--	--	--
406	c174975_g3	199,1875441	596,5730582	-1,5826	7,42E-05	0,043707	Down-regulated		XP_010915755.1	PREDICTED: delta(8)-fatty-acid desaturase 2 [Elaeis guineensis]	XM_010927506.1	PREDICTED: Elaeis guineensis delta(8)-fatty-acid desaturase-like (LOC105048251), mRNA	K13076	SLD	delta8-fatty-acid desaturase	Q3EBF7	Delta(8)-fatty-acid desaturase 2 OS=Arabidopsis thaliana GN=SLD2 PE=1 SV=1	PF00487//PF00906	Fatty acid desaturase//Hepatitis core antigen	GO:0009405//GO:0006629	pathogenesis//lipid metabolic process	GO:0005198	structural molecule activity	--	--	KOG4232
407	c169570_g1	7,694892764	55,14955711	-2,8414	7,46E-05	0,043822	Down-regulated		KMT19416.1	hypothetical protein BVRB_1g012650 [Beta vulgaris subsp. vulgaris]	--	--	--	--	--	--	--	--	--	--	--	--	--	--	--	--
408	c148381_g1	2,11788501	33,13260497	-3,9676	7,68E-05	0,044839	Down-regulated		--	--	--	--	--	--	--	--	--	PF05509	TraY domain	GO:0000746	conjugation	GO:0003677	DNA binding	--	--	--
409	c170053_g7	0	170,710478	-	7,66E-05	0,044839	Down-regulated		--	--	--	--	--	--	--	--	--	--	--	--	--	--	--	--	--	--
410	c136962_g1	49,188166	5,033064893	3,2888	7,77E-05	0,045305	Up-regulated		--	--	--	--	--	--	--	--	--	--	--	--	--	--	--	--	--	--
411	c41125_g1	19,36306414	0	-	7,80E-05	0,045349	Up-regulated		--	--	--	--	--	--	--	--	--	--	--	--	--	--	--	--	--	--
412	c171792_g4	0,316036187	34,51194737	-6,7709	7,85E-05	0,045503	Down-regulated		--	--	--	--	--	--	--	--	--	--	--	--	--	--	--	--	--	--
413	c171743_g2	2166,492169	8258,497777	-1,9305	7,87E-05	0,045517	Down-regulated		XP_009412392.1	PREDICTED: probable 3-ketoacyl-CoA synthase 2 [Musa acuminata subsp. malaccensis]	XM_010926767.1	PREDICTED: Elaeis guineensis 3-ketoacyl-CoA synthase 4-like (LOC105047716), mRNA	K15397	KCS	3-ketoacyl-CoA synthase	O65677	Probable 3-ketoacyl-CoA synthase 2 OS=Arabidopsis thaliana GN=KCS2 PE=2 SV=1	PF08541//PF08545//PF01589//PF08392	3-Oxoacyl-[acyl-carrier-protein (ACP)] synthase III C terminal//3-Oxoacyl-[acyl-carrier-protein (ACP)] synthase III//Alphavirus E1 glycoprotein//FAE1/Type III polyketide synthase-like protein	GO:0006633//GO:0008610//GO:0042967	fatty acid biosynthetic process//lipid biosynthetic process//acyl-carrier-protein biosynthetic process	GO:0004315//GO:0004252//GO:0016747	3-oxoacyl-[acyl-carrier-protein] synthase activity//serine-type endopeptidase activity//transferase activity, transferring acyl groups other than amino-acyl groups	GO:0005835//GO:0055036//GO:0019028//GO:0016020	fatty acid synthase complex//virion membrane//viral capsid//membrane	--
414	c172179_g6	1,896217121	88,12639617	-5,5384	8,03E-05	0,046361	Down-regulated		--	--	--	--	--	--	--	--	--	--	--	--	--	--	--	--	--	--
415	c168625_g1	41,88292399	4,61849595	3,1809	8,20E-05	0,047218	Up-regulated		XP_004310201.2	PREDICTED: uncharacterized protein LOC101298860 [Fragaria vesca subsp. vesca]	--	--	--	--	--	--	--	--	--	--	--	--	--	--	--	--
416	c67106_g1	144,0116149	1,000464375	7,1694	8,25E-05	0,047368	Up-regulated		CDY62398.1	BnaC07g50880D [Brassica napus]	--	--	--	--	--	--	--	--	--	--	--	--	--	--	--	--
417	c144364_g1	0,265829582	54,69958402	-7,6849	8,39E-05	0,04808	Down-regulated		CDP16574.1	unnamed protein product [Coffea canephora]	--	--	--	--	--	Q9XID3	G-type lectin S-receptor-like serine/threonine-protein kinase At1g34300 OS=Arabidopsis thaliana GN=At1g34300 PE=2 SV=1	--	--	--	--	--	--	--	--	--
418	c164908_g2	1502,327126	4149,130968	-1,4656	8,52E-05	0,048723	Down-regulated		XP_011092558.1	PREDICTED: 40S ribosomal protein S16-like [Sesamum indicum]	XM_010918635.1	PREDICTED: Elaeis guineensis 40S ribosomal protein S16-like (LOC105041659), transcript variant X2, mRNA	K02960	RP-S16e, RPS16	small subunit ribosomal protein S16e	O22647	40S ribosomal protein S16 OS=Fritillaria agrestis GN=RPS16 PE=2 SV=1	PF00380	Ribosomal protein S9/S16	GO:0042254//GO:0006412	ribosome biogenesis//translation	GO:0003735	structural constituent of ribosome	GO:0005840	ribosome	KOG1753
419	c165003_g3	2,865167152	42,20248734	-3,8806	8,54E-05	0,048726	Down-regulated		EPS72090.1	hypothetical protein M569_02668, partial [Genlisea aurea]	--	--	K09338	HD-ZIP	homeobox-leucine zipper protein	Q0J9X2	Homeobox-leucine zipper protein ROC2 OS=Oryza sativa subsp. japonica GN=ROC2 PE=2 SV=1	PF02183//PF06005//PF07716//PF06156//PF15898	Homeobox associated leucine zipper//Protein of unknown function (DUF904)//Basic region leucine zipper//Protein of unknown function (DUF972)//cGMP-dependent protein kinase interacting domain	GO:0006260//GO:0000917//GO:0006355//GO:0043093	DNA replication//barrier septum assembly//regulation of transcription, DNA-templated//FtsZ-dependent cytokinesis	GO:0019901//GO:0003700//GO:0043565	protein kinase binding//transcription factor activity, sequence-specific DNA binding//sequence-specific DNA binding	GO:0005667//GO:0005737	transcription factor complex//cytoplasm	--
420	c98709_g1	7,807395795	59,44244924	-2,9286	8,60E-05	0,048911	Down-regulated		XP_009421052.1	PREDICTED: uncharacterized protein LOC104000675 [Musa acuminata subsp. malaccensis]	--	--	--	--	--	Q2QR54	TPD1 protein homolog 1A OS=Oryza sativa subsp. japonica GN=TDL1A PE=1 SV=1	--	--	--	--	--	--	--	--	--
421	c165300_g1	126,4037357	436,6770805	-1,7885	8,77E-05	0,049668	Down-regulated		--	--	--	--	--	--	--	--	--	PF06112	Gammaherpesvirus capsid protein	--	--	--	--	GO:0019028	viral capsid	--
422	c16688_g1	163,75984	41,81730354	1,9694	8,77E-05	0,049668	Up-regulated		XP_010241522.1	PREDICTED: basic leucine zipper and W2 domain-containing protein 2-like [Nelumbo nucifera]	XM_009385061.1	PREDICTED: Musa acuminata subsp. malaccensis basic leucine zipper and W2 domain-containing protein 2-like (LOC103971107), mRNA	--	--	--	Q6PD83	Basic leucine zipper and W2 domain-containing protein 1-A OS=Danio rerio GN=bzw1a PE=2 SV=1	PF02020	eIF4-gamma/eIF5/eIF2-epsilon	--	--	GO:0005515	protein binding	--	--	KOG2297
