# Supplementary material for: Transcriptome Analysis of Key Genes Involved in Color Variation between Blue and White Flowers of Iris bulleyana
Source: Biomed Res Int. 2023 Jan 18;2023:7407772. doi: 10.1155/2023/7407772 (PMC9876678; doi:10.1155/2023/7407772)
Supplement: Supplementary Materials — Additional File 1: flavonoid targeted metabolomics. (a) Clustering of identified metabolites in Southwest iris (LHYW) and its white variant (BHYW). (b) KEGG enrichment map of different metabolites. (c) KEGG enrichment for flavonoid metabolic pathways. Table S2: top 20 most abundant metabolites in pitaya fruit peel. Table S3: top 20 most abundant metabolites in pitaya fruit pulp. Additional File 2: flavonoid profile of Southwest iris (LHYW) and its white variant (BHYW). Additional File 3: histogram of identified carotenoids and their corresponding levels in Southwest iris (LHYW) and its white variant (BHYW). Additional File 4: targeted metabolomics for carotenoids and identified carotenoids between BHYW (white) and LHYW (Southwest blue iris). Additional File 5: metabolic profile of carotenoids and identified carotenoids between BHYW (white) and LHYW (Southwest blue iris). Additional File 6; summary of sequencing data quality. Additional File 7: list of differentially expressed genes (DEGs) identified as a result of the transcriptomic study of Southwest iris. Additional File 8: list of primers used for qRT-PCR. [file 7407772.f1.zip › Additional file 8.txt]

Additional file 8; List of primers used for qRT-PCR
No.	Gene Symbol	Gene	Forward primer	Reverse primer	Product length(bp)	Ta(?)
1	c178689_g1	CHS	GGCATTCCTACCTAACGTG	TTGTGGTCGTAGGCCAAG	64	60
2	c165047_g2	CHS2	CAGTCCGAGTACCCGGATTA	CATCGACTTGTCACACATTC	96	60
3	c151362_g1	CHI	CTACGAAGCCCTAATCTCAG	CTCCTTTATCACCACGACT	61	60
4	c173776_g1	FNS	GCAGGCAGGAACAGATAC	CAGCTTGTCAGGATTGCTA	76	60
5	c172658_g1	FLS	GAGATATTGAGCAACGGGAAA	TTCTCCTTGTTCACTGTCGTC	62	60
6	c145508_g1	F3H	CTCCATTCCTTCCTACCATCT	CTCCTCGTCACGCACAAA	65	60
7	c144091_g2	F3'H	CTTGCTCCTAAACCTGTTCAC	CAACTATGGCCCATTCTACT	68	60
8	c144091_g1	F3'5'H	GTGCTCATCGGGATCAGG	TTGATGGCGGTATCGGTG	65	60
9	c151171_g1	DFR	CTCATACCCTTCCCTGAGAAT	GTCCTCTGCTCCATGAACTA	87	60
10	c117196_g1	ANS	GAGAAGGAGAGGCTGCATT	CTATCCCGTGGTTCACGA	85	60
11	c174379_g1	3GT	AGTCGTATCGAAGTTGTGGA	ATGATAGCATCTGCCACATTG	81	60
12	c134319_g1	5GT	GATCACGACACGAGCGACTA	CCGAAGCAAACGTACACCA	74	60
13	c167438_g1	3AT	CTTCCATCATTGCCAACCT	GCGAACTCGTTCTTGAGC	86	60
14	c161528_g2	5,3GT	TAGCGGCAACTCGGACAA	AGAAACCCTTCGGGAAGTA	75	60
15	c160759_g1	PSY2	AACCAGCTAACAAACATACTCC	GTAAATCCGTCCTCTTCTTGC	60	60
16	c172816_g1	PDS	TTGAGGCTCAGGATGGTT	TTGACTCGATCAGGCACAC	67	60
17	c168460_g1	ZDS	GTTGTTTCCTCCAGAACCTGA	CAAGCCCAGCTCCAATAATAG	71	60
18	c168442_g1	LCYB	GCTTTCAGGTGAAGCACT	CCTTCTCCTCTCGATAGGC	64	60
19	c144636_g1	ZEP	GTTACAGTGACACTTGAGAACG	TACCATCAGCTCCAACCAGA	64	60
20	c143882_g1	VDE	TGCCCGAGACCATAATCC	GCCACACGTATTGTCTGTT	92	60
21	Reference gene	ACT	GGATTACGAACAGGAGCTAGA	CCCATCAGGCATTTCATAAGT	73	60
